# Supplementary material for: Tracking the Origin and Deciphering the Phylogenetic Relationship of Porcine Epidemic Diarrhea Virus in Ecuador
Source: Hindawi journal article supplement (doi:10.1155/2017/2978718), 2017-01-01

# **Tracking the origin and deciphering the phylogenetic relationships of porcine epidemic diarrhea virus in Ecuador.**

Maritza Barrera<sup>a,b</sup>, Ana Garrido-Haro<sup>a</sup>, María S. Vaca<sup>a</sup>, Danilo Granda<sup>a</sup>, Lester J. Pérez<sup>c\*</sup>

<sup>a</sup>*Laboratorio de Biología Molecular. Agencia Ecuatoriana de Aseguramiento de Calidad del Agro (Agrocalidad), Av. Interoceánica Km. 14.5, La Granja MAGAP, Tumbaco, Pichincha, Ecuador.*

<sup>b</sup>*Proyecto Prometeo. Secretaría Nacional de Educación Superior, Ciencia, Tecnología e Innovación-SENESCYT, Casa Patrimonial, calle 9 de Octubre y Ramírez Dávalos, Quito, Pichincha.*

<sup>c</sup>*Dalhousie Medicine New Brunswick (DMNB), Saint John, New Brunswick, E2L4L5, Canada.*

\*Corresponding Author: +1 506-636-6977, Fax:+1 506-636-6258.

E-mail address: lester.perez@dal.ca (Pérez, L.J.)

## **Supplementary material**

**Table S1. Sequence used for phylogenetic inferences and phylogeographic approaches**

| <b>GenBank Assession No.</b> | <b>Year of collection</b> | <b>Country</b> | <b>Isolate/strain</b> |
|------------------------------|---------------------------|----------------|-----------------------|
| AB548618                     |                           | Japan          | 83P-5                 |
| AB548619                     |                           | Japan          | 83P-5 34th p          |
| AB548620                     |                           | Japan          | 83P-5 61 th p         |
| AB548621                     |                           | Japan          | 83P-5 6100th p        |
| AB548622                     |                           | Japan          | KH                    |
| AB548623                     |                           | Japan          | NK                    |
| AB548624                     |                           | Japan          | MK                    |
| AB857233                     | 2012                      | China          | GDS01                 |
| AB857234                     | 2013                      | China          | GDS02                 |
| AB857235                     | 2013                      | China          | GDS03                 |
| AY653204                     |                           | China          | JS-2004-2             |
| DQ462404                     |                           | South Korea    | DR13( atenuada)gen S  |
| DQ862099                     |                           | South Korea    | DR13( atenuada)Genoma |
| JN315706                     | 2011                      | China          | CH/FJND-2/2011        |
| JN543367                     | 2011                      | China          | CH/FJND-1/2011        |
| JN599150                     | 1994                      | China          | CV777                 |
| JN825706                     | 2011                      | China          | BJ-2011-2             |
| JN825707                     | 2011                      | China          | HB-2011-1             |
| JN825708                     | 2011                      | China          | HB-2011-2             |
| JN825709                     | 2011                      | China          | HB-2011-3             |
| JN825710                     | 2011                      | China          | ZJ-2011-1             |
| JN825711                     | 2011                      | China          | ZJ-2011-2             |
| JN825712*                    | 2011                      | China          | BJ-2011-1             |
| JN980698                     | 2011                      | China          | CHGD-01               |
| JQ239429                     | 2011                      | China          | CH1                   |
| JQ239430                     | 2011                      | China          | CH2                   |
| JQ239431                     | 2011                      | China          | CH3                   |
| JQ239432                     | 2011                      | China          | CH4                   |
| JQ239433                     | 2011                      | China          | CH5                   |
| JQ239434                     | 2011                      | China          | CH6                   |
| JQ239435                     | 2011                      | China          | CH7                   |
| JQ239436                     | 2011                      | China          | CH8                   |
| JN381492                     | 2011                      | China          | CH/FJND-3/2011        |

|          |      |       |                |
|----------|------|-------|----------------|
| JQ517274 | 2011 | China | HuN            |
| JQ627653 | 2011 | China | CH/AY/11       |
| JQ627654 | 2011 | China | CH/CG/11       |
| JQ638915 | 2011 | China | CH/GD/2011     |
| JQ638916 | 2011 | China | CH/HLJHH/2011  |
| JQ638917 | 2011 | China | CH/SDLY/2011   |
| JQ638918 | 2011 | China | CH/HBBD/2011   |
| JQ638919 | 2011 | China | CH/SDQD/2011   |
| JQ638920 | 2011 | China | CH/JLCC/2011   |
| JQ638921 | 2011 | China | CH/BJSY/2011   |
| JQ638922 | 2011 | China | CH/HBQHD/2011  |
| JQ638923 | 2011 | China | CH/JLGZL/2011  |
| JQ638924 | 2011 | China | CH/JL/2011     |
| JQ979287 | 2011 | China | CH9-FJ         |
| JQ979288 | 2011 | China | CH13-GX        |
| JQ979289 | 2011 | China | CH17-GZ        |
| JQ979290 | 2011 | China | CH22-JS        |
| JQ979291 | 2011 | China | CH18-Hainan    |
| JX018179 | 2012 | China | CH/GXNN/2012   |
| JX018180 | 2012 | China | CH/YNKM/2012   |
| JX018181 | 2012 | China | CH/AHHF/2012   |
| JX018182 | 2012 | China | CH/AHHF-2/2012 |
| JX018183 | 2012 | China | CH/HBSN/2012   |
| JX070671 | 2012 | China | CH/FJXM-1/2012 |
| JX070672 | 2012 | China | CH/FJXM-2/2012 |
| JX112709 | 2012 | China | GD-A           |
| JX163294 | 2012 | China | HBMC2012       |
| JX188454 | 2011 | China | AJ1102         |
| JX258672 | 2012 | China | FQ/FJ/2012     |
| JX261936 | 2011 | China | CHGD-01        |
| JX435298 | 2011 | China | BJ-2011-3      |
| JX435299 | 2012 | China | BJ-2012-1      |
| JX435300 | 2012 | China | BJ-2012-2      |
| JX435301 | 2011 | China | HB-2011-4      |
| JX435302 | 2012 | China | HB-2012-1      |
| JX435303 | 2012 | China | HB-2012-2      |

|           |      |             |                   |
|-----------|------|-------------|-------------------|
| JX435304  | 2012 | China       | HB-2012-3         |
| JX435305  | 2012 | China       | HB-2012-4         |
| JX489155  | 2011 | China       | LC                |
| JX524137  | 2011 | China       | ZJCZ4             |
| JX647847  | 2011 | China       | GD-1              |
| KC196276* | 2011 | China       | CH/ZMDZY/11       |
| KC210147* | 2012 | China       | JS-HZ2012         |
| KC242898  | 2012 | China       | HeN12-20122       |
| KC242899  | 2012 | China       | HB1-20122         |
| KC242900  | 2012 | China       | HB2-20122         |
| KC242902  | 2012 | China       | HB3-20123         |
| KC242903  | 2012 | China       | ZJ17-20125        |
| KC242904  | 2012 | China       | YN2-20127         |
| KC242905  | 2012 | China       | FJ5-20128         |
| KC242906  | 2012 | China       | FJZZ9-20128       |
| KC242907  | 2012 | China       | JX4-20129         |
| KC242908  | 2012 | China       | HN4-20129         |
| KC242897  | 2011 | China       | FJZZ1-2011        |
| KC242901  | 2012 | China       | AH2-20123         |
| KC242911  | 2012 | China       | HN6-201211        |
| KC242912  | 2012 | China       | HN8-201211        |
| KC879275  | 2011 | South Korea | AS01              |
| KC879276  | 2012 | South Korea | AS02              |
| KC879277  | 2012 | South Korea | AS03              |
| KC879278  | 2011 | South Korea | NJ01              |
| KC879279  | 2012 | South Korea | NJ02              |
| KC879280  | 2011 | South Korea | AD01              |
| KC879281  | 2012 | South Korea | AD02              |
| KC879282  | 2012 | South Korea | AD03              |
| KF177254  | 2012 | China       | JY5C              |
| KF177257  | 2012 | China       | YJ3F              |
| KF177258  | 2012 | China       | YJ7C              |
| KF272920* | 2013 | USA         | USA/Colorado/2013 |
| KF294254  | 2013 | China       | HZXS-1            |
| KF294255  | 2013 | China       | HZXS-2            |
| KF294256  | 2012 | China       | GJL               |

|           |      |             |                          |
|-----------|------|-------------|--------------------------|
| KF384500  | 2012 | China       | CH/GDGZ/2012             |
| KF452322* | 2013 | USA         | USA/Iowa/16465/2013      |
| KF468752* | 2013 | USA         | MN                       |
| KF468753* | 2013 | USA         | IA1                      |
| KF468754* | 2013 | USA         | IA1                      |
| KF468755  | 2013 | China       | XS2013                   |
| KF546800  | 2012 | China       | GDFS/2011                |
| KF546801  | 2012 | China       | GDQY/2011                |
| KF546802  | 2012 | China       | GDDG/2011                |
| KF546803  | 2012 | China       | GDJM/2012                |
| KF546804  | 2012 | China       | GDZQ/2012                |
| KF577730  | 2013 | China       | YNKM/2012                |
| KF577731  | 2013 | China       | GDMZ/2013                |
| KF577732  | 2013 | China       | GDGZ/2013                |
| KF601195  | 2013 | China       | GXLZ/2013                |
| KF601196  | 2013 | China       | JXGZ/2013                |
| KF601197  | 2013 | China       | HNCZ/2013                |
| KF601198  | 2013 | China       | JXJA/2013                |
| KF601199  | 2013 | China       | GXHZ/2013                |
| KF601200  | 2013 | China       | GDEP/2013                |
| KF601201  | 2013 | China       | GXNN/2013                |
| KF650372* | 2013 | USA         | ISU13-19338E-IN-passage9 |
| KF650373  | 2013 | USA         | ISU13-22038-Iahomogenate |
| KF650374  | 2013 | USA         | ISU13-22038-IA-passage3, |
| KF650375  | 2013 | USA         | ISU13-22038-IA-passage9  |
| KF738258  | 2012 | China       | GD120330                 |
| KF738259  | 2013 | China       | JS130604                 |
| KF738260  | 2013 | China       | JX130506                 |
| KF738261  | 2013 | China       | SD130502                 |
| KF738262  | 2013 | China       | SD130611                 |
| KF738263  | 2012 | China       | SH121229                 |
| KF738264  | 2012 | China       | ZJ121030                 |
| KF760557  | 2013 | China       | CH/JX-1/2013             |
| KF761675  | 2013 | China       | CH/YNKM-8/2013           |
| KF779469  | 2013 | South Korea | MF3809/2008/South Korea  |
| KF840537  | 2012 | China       | CH/ZJCX-1/2012           |
| KF840538  | 2012 | China       | CH/ZJHY-2/2012           |

|             |      |             |                         |
|-------------|------|-------------|-------------------------|
| KF840539    | 2012 | China       | CH/ZJJS-Z/2012          |
| KF840540    | 2012 | China       | CH/ZJJS-1Z/2012         |
| KF840541    | 2012 | China       | CH/JXZS-3H/2012         |
| KF840542    | 2012 | China       | CH/JXZS-2H/2012         |
| KF840543    | 2012 | China       | CH/ZJXS212/2012         |
| KF840544    | 2013 | China       | CH/ZJHZHY-6/2013        |
| KF840545    | 2012 | China       | CH/JXJDZ-F/2012         |
| KF840546    | 2012 | China       | CH/ZJJS-2Z/2012         |
| KF840547    | 2012 | China       | CH/JXZS-3L              |
| KF738258    | 2013 | China       | GD120330                |
| KF738259    | 2013 | China       | JS130604                |
| KF738260    | 2013 | China       | JX130506                |
| KF738261    | 2013 | China       | SD130502                |
| KF738262    | 2013 | China       | SD130611                |
| KF738263    | 2012 | China       | SH121229                |
| KF738264    | 2012 | China       | ZJ121030                |
| KF760557    | 2013 | China       | CH/JX-1/2013            |
| KF761675    | 2013 | China       | CH/YNKM-8/2013          |
| KF779469    | 2008 | South Korea | MF3809/2008/South Korea |
| KF840537    | 2012 | China       | CH/ZJCX-1/2012          |
| KF840538    | 2012 | China       | CH/ZJHY-2/2012          |
| KF840539    | 2012 | China       | CH/ZJJS-Z/2012          |
| KF840540    | 2012 | China       | CH/ZJJS-1Z/2012         |
| KF840541    | 2012 | China       | CH/JXZS-3H/2012         |
| KF840542    | 2012 | China       | CH/JXZS-2H/2012         |
| KF840543    | 2012 | China       | CH/ZJXS212/2012         |
| KF840544    | 2013 | China       | CH/ZJHZHY-6/2013        |
| KF840545    | 2012 | China       | CH/JXJDZ-F/2012         |
| KF840546    | 2012 | China       | CH/ZJJS-2Z/2012         |
| KF840547    | 2012 | China       | CH/JXZS-3L              |
| KF840548    | 2012 | China       | CH/JXZS-1223L           |
| KF840549    | 2012 | China       | CH/SDZD-1/2012          |
| KF840550    | 2012 | China       | CH/SDZD-2/2012          |
| KF840551    | 2012 | China       | CH/HuBWHYQ/2012         |
| KF840552    | 2012 | China       | CH/ZJQZ-2/2012          |
| KF840553.1_ | 2012 | China       | CH/ZJHZ-1C/2012         |
| KF840555    | 2012 | China       | CH/JXJDZ-1/2012         |

|             |      |             |                        |
|-------------|------|-------------|------------------------|
| KF840556    | 2012 | China       | CH/ZJJS-4X/2012        |
| KF840561    | 2013 | China       | CH/JSZL-S2/2013        |
| KF840562    | 2013 | China       | CH/JSZL-N2/2013        |
| KF898124    | 1997 | South Korea | KPEDV-9                |
| KJ020932    | 2013 | China       | CHYJ130330             |
| KJ184549    | 2013 | USA         | USA/KS/2013            |
| KJ196348    | 2013 | China       | SHQP/YM/2013           |
| KJ399978    | 2014 | USA         | OH851                  |
| KJ408801    | 2014 | USA         | OH1414                 |
| KJ526096    | 2013 | China       | CH/JX-2/2013           |
| KJ539151    | 2013 | South Korea | K13JA12-1              |
| KJ539152    | 2013 | South Korea | K13JA12-3              |
| KJ539153    | 2013 | South Korea | K13JA11-4              |
| KJ584361    | 2013 | USA         | OH15962                |
| KF452323.1_ | 2013 | USA         | USA/Indiana/17846/2013 |
| KJ539154.1_ | 2014 | South Korea | K14JB01                |
| KJ646578    | 2013 | China       | FJ-ZP 2013             |
| KJ646579    | 2013 | China       | FJ-CL 2013             |
| KJ646580    | 2014 | China       | FJ-FQ 2014             |
| KJ646581    | 2012 | China       | FJ-FQ1 2012            |
| KJ646582    | 2012 | China       | FJ-FQ2 2012            |
| KJ646583    | 2012 | China       | FJ-LY 2012             |
| KJ646584    | 2013 | China       | FJ-LY 2013             |
| KJ646585    | 2012 | China       | FJ-ND 2012             |
| KJ646586    | 2013 | China       | FJ-ND 2013             |
| KJ646587    | 2013 | China       | FJ-PT 2013             |
| KJ646588    | 2013 | China       | FJ-QK 2013             |
| KJ646589    | 2013 | China       | FJ-QZ 2013             |
| KJ646590    | 2013 | China       | FJ-YX 2013             |
| KJ646591    | 2014 | China       | FJ-ZP 2014             |
| KJ662670    | 2013 | South Korea | KNU-1305               |
| KJ777677    | 2012 | China       | FGE_20140427           |
| KJ777678    | 2012 | China       | CPGEN_20140427         |
| KJ778616    | 2013 | USA         | NPL-PEDv/2013/P10      |
| KM052365*   | 2013 | USA         | NPL-PEDv/2013/p10.1    |
| KM108348    | 2014 | South Korea | KPV1401                |
| KM108349    | 2014 | South Korea | KPV1402                |

|            |      |             |                                     |
|------------|------|-------------|-------------------------------------|
| KM108350   | 2014 | South Korea | KPV1403                             |
| KM108351   | 2014 | South Korea | KPV1404                             |
| KM108352   | 2014 | South Korea | KPV1405                             |
| KM108353   | 2014 | South Korea | KPV1406                             |
| KJ778615.1 | 2013 | USA         | NPL-PEDv/2013                       |
| KM189367.2 | 2014 | Canada      | ON-018                              |
| KM189368   | 2014 | Canada      | PEI-023                             |
| KM196109   | 2014 | Canada      | SK-030                              |
| KM196110   | 2014 | Canada      | 2014-022; Bioassay Piglet # 30 3dpi |
| KM196111   | 2014 | Canada      | MB-021                              |
| KM213245   |      | China       | ZJ13LY1201                          |
| KM242131   | 2014 | China       | CH/GDZQ/2014                        |
| KM403155   | 2014 | South Korea | KNU-1406-1                          |
| KM406178   |      | China       | LS1401                              |
| KM406179   | 2014 | China       | MY1402                              |
| KM406180   | 2014 | China       | DY1403                              |
| KM406181   | 2014 | China       | SH1404                              |
| KM406182   | 2014 | China       | MX1405                              |
| KM406183   | 2014 | China       | PZ1406                              |
| KM406184   | 2014 | China       | PJ1407                              |
| KM609203   | 2012 | China       | PEDV-1C                             |
| KM609204   | 2011 | China       | PEDV-7C                             |
| KM609205   |      | China       | PEDV-8C                             |
| KM609206   | 2012 | China       | PEDV-10F                            |
| KM609207   | 2011 | China       | PEDV-14                             |
| KM609208   | 2012 | China       | PEDV-15F                            |
| KM609209   | 2013 | China       | PEDV-CHZ                            |
| KM609210   | 2014 | China       | PEDV-LY                             |
| KM609211   | 2014 | China       | PEDV-LS                             |
| KM609212   | 2014 | China       | PEDV-LYG                            |
| KM609213   | 2014 | China       | PEDV-WS                             |
| KP276244.1 | 2014 | Taiwan      | TW-Chiayi-24                        |
| KP276247   | 2014 | Taiwan      | TW-Yunlin-82                        |
| KP276248   | 2014 | Taiwan      | TW-Yunlin-91                        |
| KP276249   | 2014 | Taiwan      | TW-Yunlin-71                        |
| KP276250   | 2014 | Taiwan      | TW-Pingtung-63                      |
| KP276251   | 2014 | Taiwan      | TW-Pingtung-41                      |



|          |      |          |                   |
|----------|------|----------|-------------------|
| KP276252 | 2014 | Taiwan   | TW-Pingtung-52    |
| KP455313 | 2013 | Viet Nam | HUA-PED45         |
| KP455314 | 2013 | Viet Nam | HUA-PED47         |
| KP455315 | 2013 | Viet Nam | HUA-PED55         |
| KP455316 | 2014 | Viet Nam | HUA-PED58         |
| KP455317 | 2014 | Viet Nam | HUA-PED60         |
| KP455318 | 2014 | Viet Nam | HUA-PED63         |
| KP455319 | 2014 | Viet Nam | HUA-PED67         |
| KP455320 | 2014 | Viet Nam | HUA-PED68         |
| KR003452 | 2015 | Belgium  | 15V010/BEL/2015   |
| KR011756 | 2014 | France   | FR/001/2014       |
| KR296663 | 2015 | China    | CH-GGC-01-2015    |
| KR296664 | 2015 | China    | CH-GLC-02-2015    |
| KR296665 | 2014 | China    | CH-GLC-12-2014    |
| KR296666 | 2015 | China    | CH-HFEC-01-2015   |
| KR296667 | 2015 | China    | CH-HGC-01-2015    |
| KR296668 | 2015 | China    | CH-HSYKFC-01-2015 |
| KR296669 | 2015 | China    | CH-JPYC-02-2015   |
| KR296670 | 2015 | China    | CH-QTC-01-2015    |
| KR296671 | 2015 | China    | CH-SBC-03-2015    |
| KR296672 | 2014 | China    | CH-SFC-12-2014    |
| KR296673 | 2014 | China    | CH-SHC-12-2014    |
| KR296674 | 2014 | China    | CH-STC-12-2014    |
| KR296675 | 2014 | China    | CH-TPC-12-2014    |
| KR296676 | 2015 | China    | CH-WTC-02-2015    |
| KR296677 | 2015 | China    | CH-XBC-01-2015    |
| KR296678 | 2015 | China    | CH-YGC-01-2015    |
| KR296679 | 2015 | China    | CH-ZSC-01-2015    |
| KR296680 | 2015 | China    | CH-ZWBZa-01-2015  |
| KR296681 | 2015 | China    | CH-ZWBZb-01-201   |
| KR296682 | 2015 | China    | CH-ZWC-01-2015    |
| KR296683 | 2015 | China    | CH-CLC-01-2015    |
| KM213246 |      | China    | SH131202          |
| EF185992 |      | China    | LZC               |
| JN547228 | 1986 | China    | CH/S              |
| JX560761 | 2012 | China    | SD-M              |
| KF840557 | 2012 | China    | CH/ZJQZ-2w/2012   |

|           |      |             |                            |
|-----------|------|-------------|----------------------------|
| KF840558  | 2012 | China       | CH/ZJDX-1/2012             |
| KJ158152  | 2011 | China       | AH-M                       |
| KM213244  |      | China       | ZJ14NB0401                 |
| KM213247  |      | China       | ZJ13SX1101                 |
| KM213248  |      | China       | ZJ13XS0401                 |
| KM213249  |      | China       | ZJ14HZ0301                 |
| JX088695* | 2012 | China       | Strain-GD-B                |
| KC210145* | 2012 | China       | AH2012                     |
| KF468754* | 2013 | USA         | Isolate-IA2                |
| KM392227* | 2013 | USA         | TC-PC170-P2                |
| KM189366* | 2014 | Canada      | Isolate-ON-007             |
| KJ588063* | 2014 | Korea       | KUIDL-PED 2014-002         |
| KJ767196* | 2014 | USA         | Strain-OhioVBS2            |
| KJ645707* | 2013 | USA         | USA-Minnesota84            |
| KJ645703* | 2014 | USA         | Strain-USA-Minnesota127    |
| KJ645698* | 2014 | USA         | USA-Ohio120                |
| KJ645694* | 2013 | USA         | USA-Iowa103                |
| KJ645692* | 2013 | USA         | USA-Missouri101            |
| KJ645689* | 2013 | USA         | USA-Illinois97             |
| KJ645688* | 2013 | USA         | USA-Iowa96                 |
| KJ645686* | 2013 | USA         | Strain-USA-Minnesota94     |
| KJ645662* | 2013 | USA         | Strain-USA-NorthCarolina66 |
| KJ645645* | 2013 | USA         | USA-Texas39                |
| KJ645638* | 2013 | USA         | USA-Colorado30             |
| KJ662670* | 2013 | South Korea | KNU-1305-S                 |

## Supplementary material

**Table S2. Comparison of topologies obtained for the complete S gene using ML, NJ and BI methods.**

| Tree | Li         | pKH   | pSH   | pRELL |
|------|------------|-------|-------|-------|
| S-BI | -12018.922 | -1    | -1    | 0.592 |
| S-ML | -12021.478 | 0.129 | 0.719 | 0.078 |
| S-NJ | -12032.416 | 0.285 | 0.540 | 0.270 |

**Li:** log-likelihoods

**pKH:** P value for KH normal test (Kishino & Hasegawa 1989).

**pRELL:** RELL bootstrap proportions (Kishino & Hasegawa 1989)

**pSH:** P value with multiple-comparison correction (MC in table 1 of Shimodaira & Hasegawa 1999)

(-1 for P values means N/A)

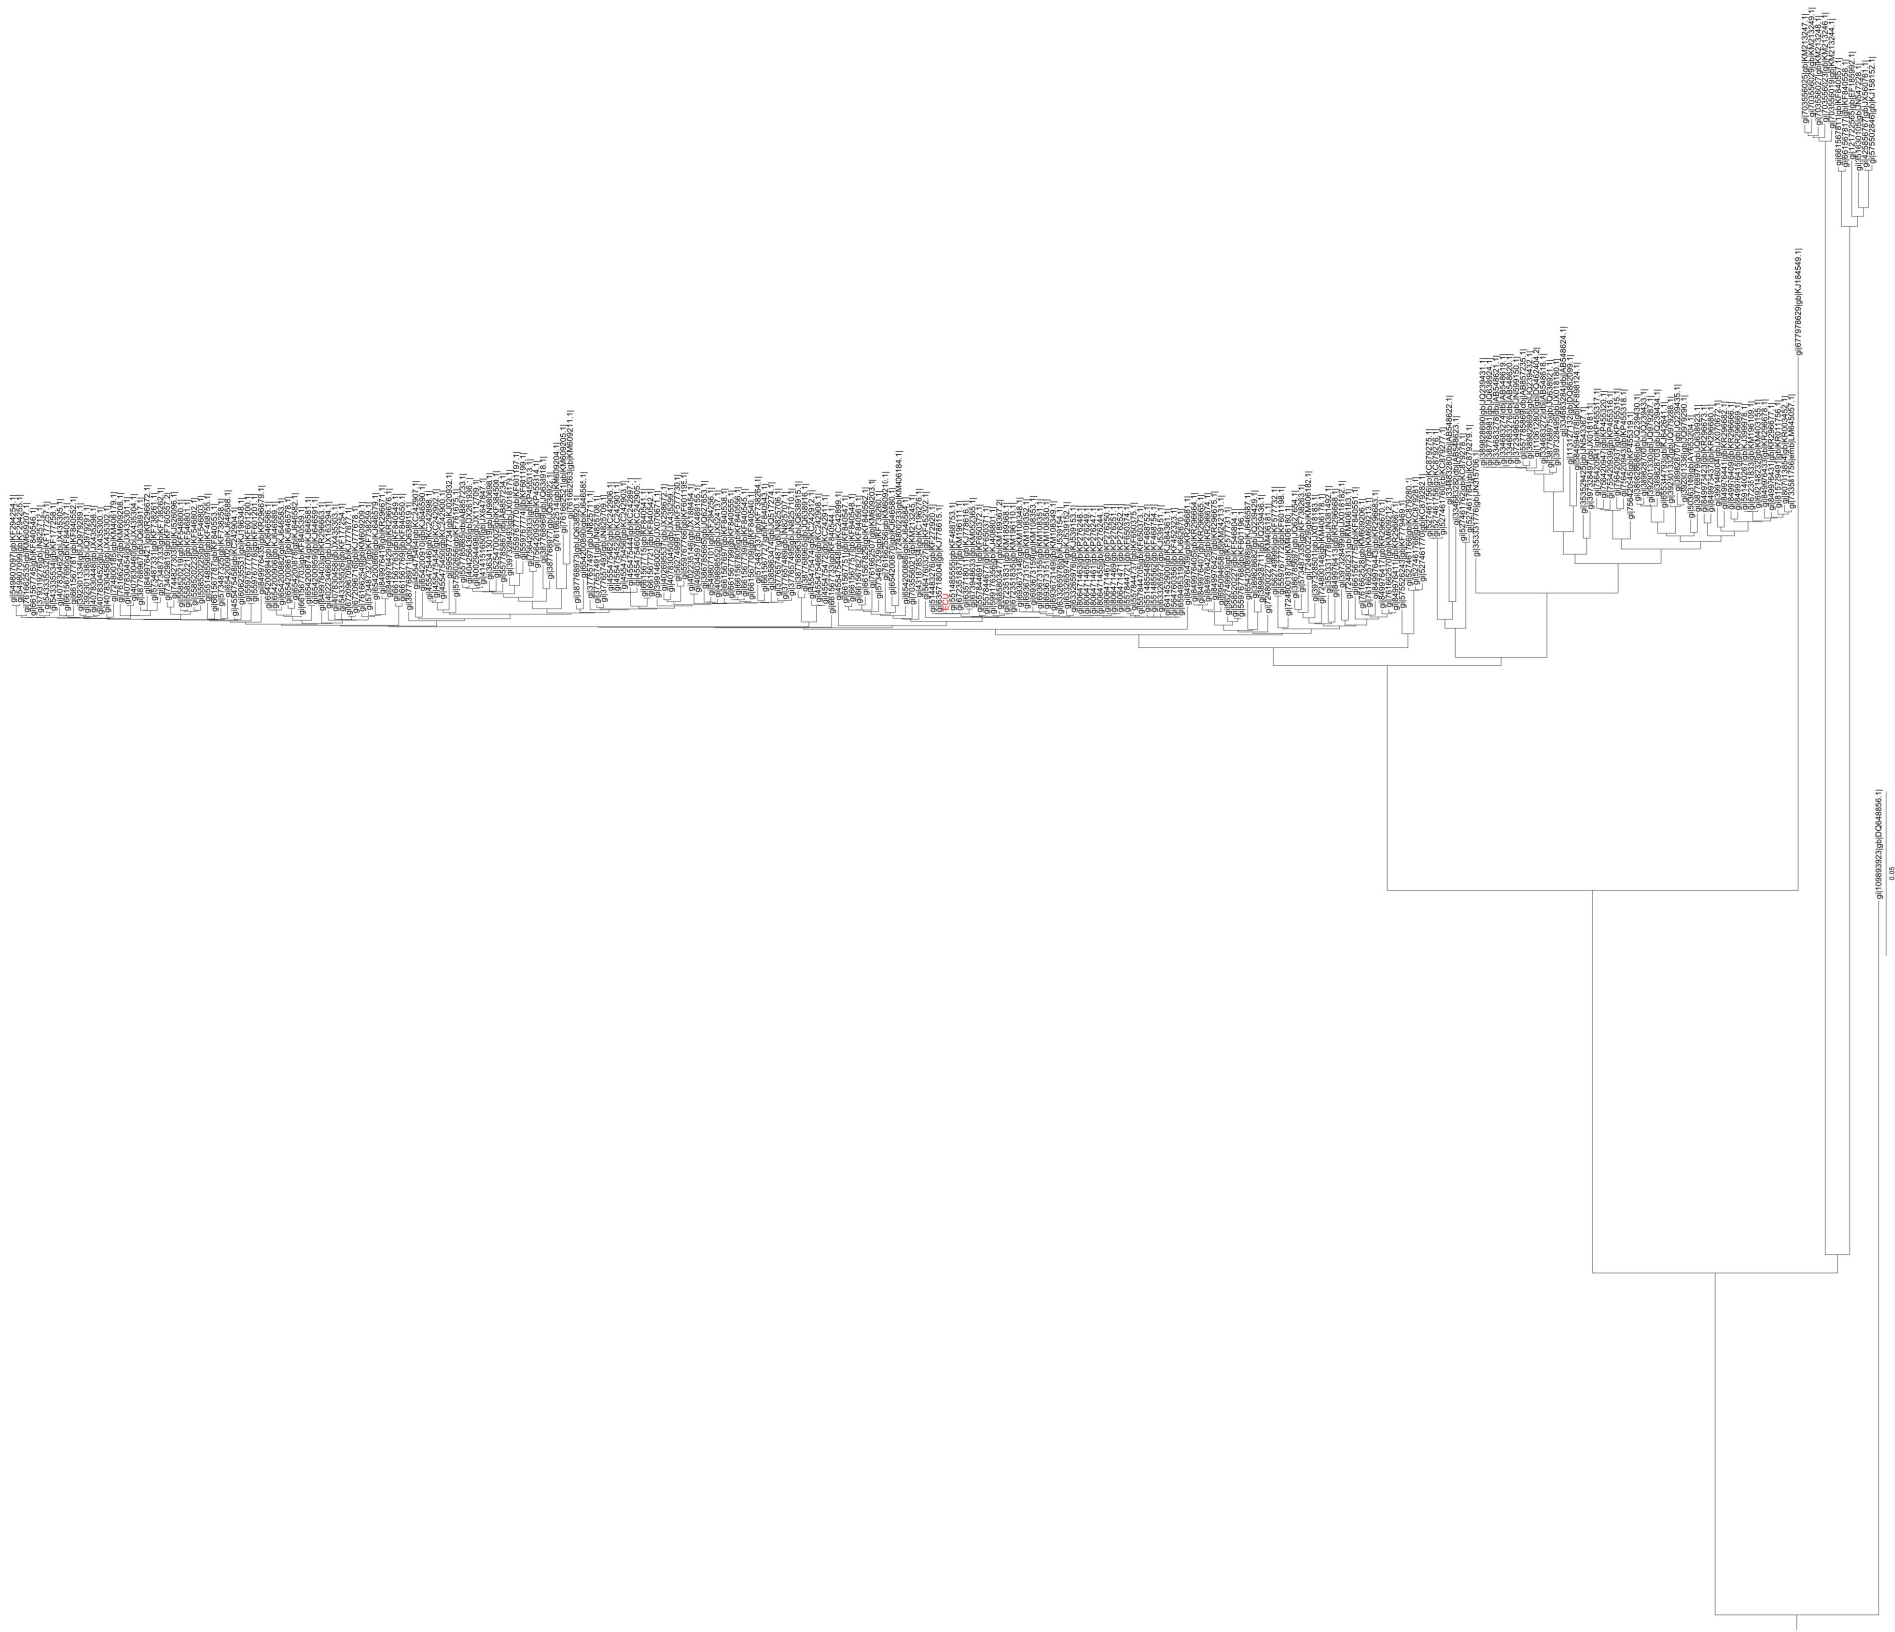

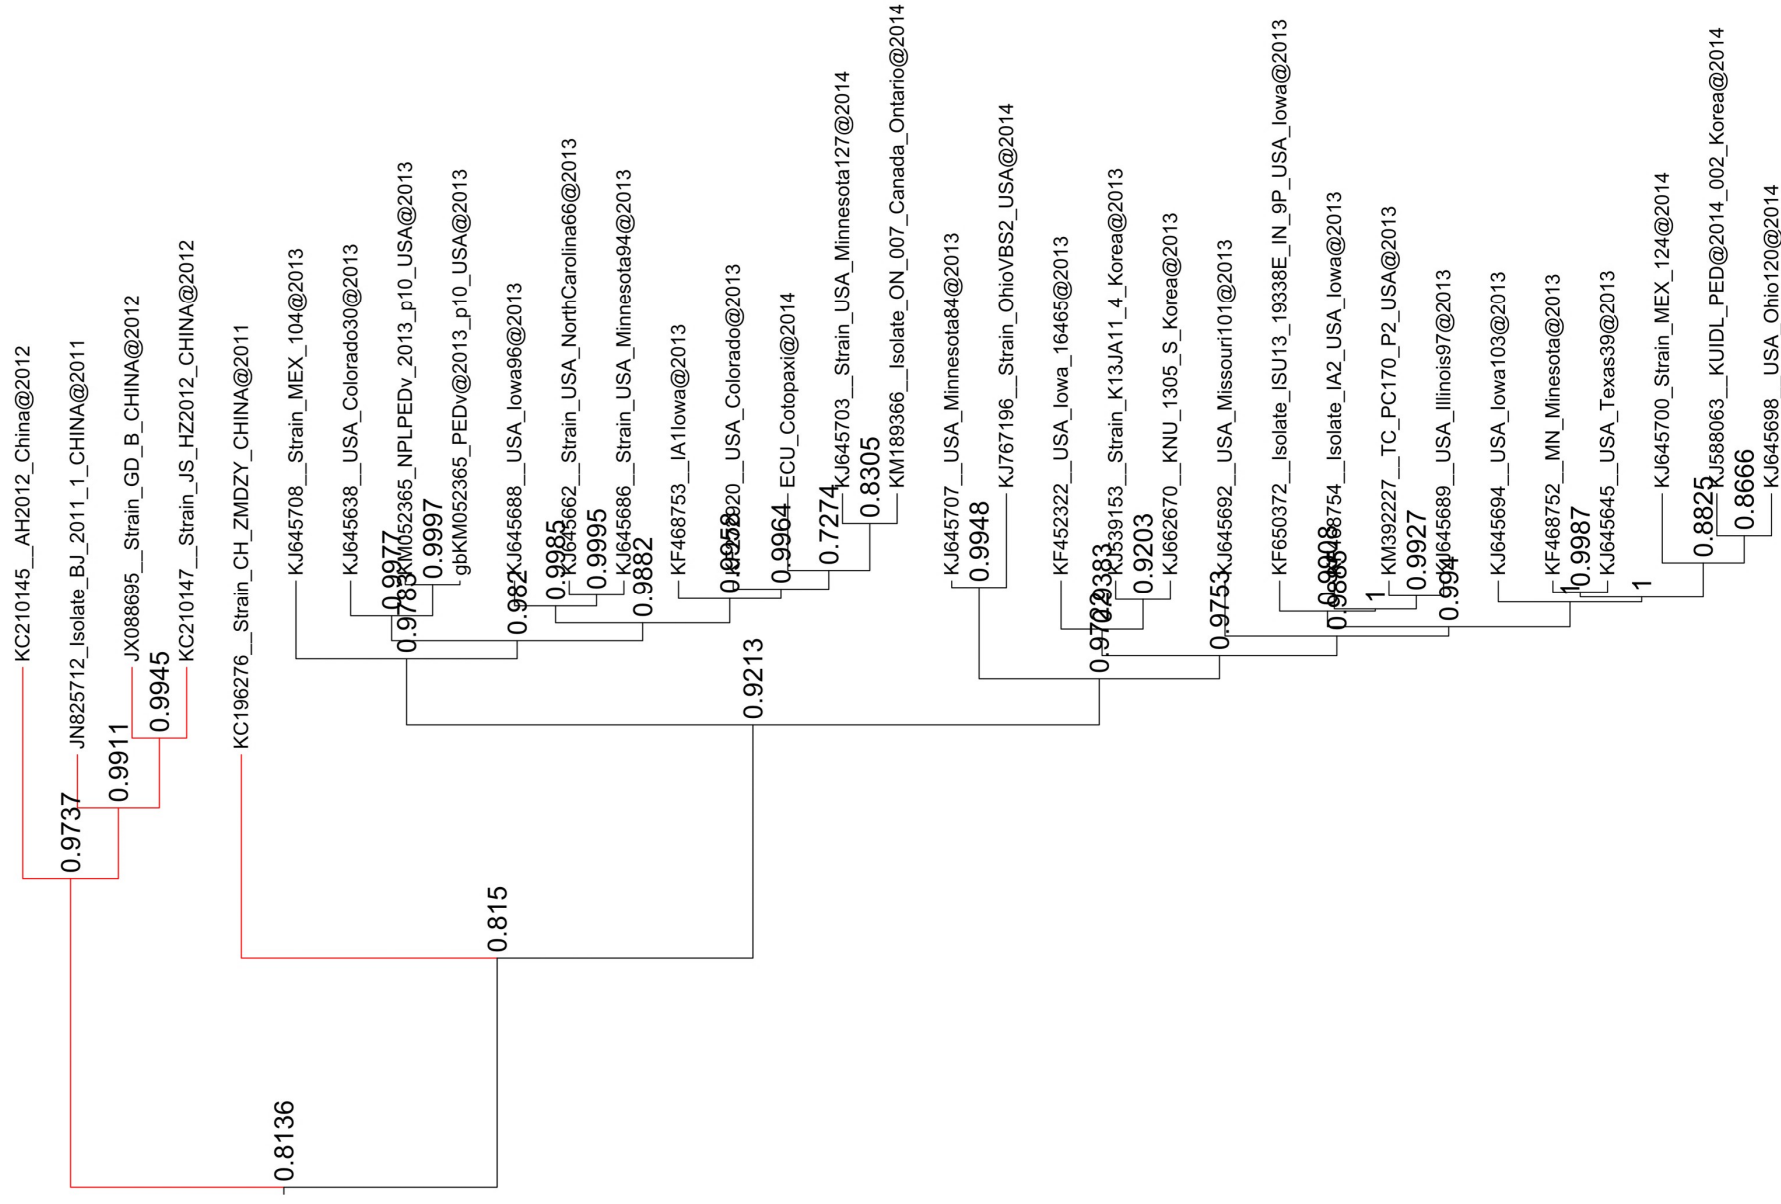

Supplement: f1 [file 2978718.f1.zip]
