# Supplementary material for: Tracking the Origin and Deciphering the Phylogenetic Relationship of Porcine Epidemic Diarrhea Virus in Ecuador
Source: Biomed Res Int. 2017 Dec 12;2017:2978718. doi: 10.1155/2017/2978718 (PMC5742880; doi:10.1155/2017/2978718)
Supplement: Supplementary Materials — Table S1. PEDV sequences of the complete S gene used in the current study (xls). Table S2. Comparison of topologies obtained for the complete S gene using ML, NJ, and BI methods. Figure S1. Phylogenetic tree obtained from the complete S gene and all sequences collected (Table S1) (TIFF). Figure S2. Maximum credibility phylogeographic tree. The posterior probabilities for state were denoted (TIFF). Video S1. Dynamics of spatial PEDV diffusion. The most probable temporal distribution of PEDV is provided; only rates supported by a BF of >5 were considered significant. [file 2978718.f1.zip]

Archive with 3 entries (2 files):
- 2978718.f1/
- 2978718.f1/2978718.f1.pdf
- 2978718.f1/2978718.f2.kml
