# Supplementary material for: Tracking the Origin and Deciphering the Phylogenetic Relationship of Porcine Epidemic Diarrhea Virus in Ecuador
Source: Biomed Res Int. 2017 Dec 12;2017:2978718. doi: 10.1155/2017/2978718 (PMC5742880; doi:10.1155/2017/2978718)
Supplement: Supplementary Materials — Table S1. PEDV sequences of the complete S gene used in the current study (xls). Table S2. Comparison of topologies obtained for the complete S gene using ML, NJ, and BI methods. Figure S1. Phylogenetic tree obtained from the complete S gene and all sequences collected (Table S1) (TIFF). Figure S2. Maximum credibility phylogeographic tree. The posterior probabilities for state were denoted (TIFF). Video S1. Dynamics of spatial PEDV diffusion. The most probable temporal distribution of PEDV is provided; only rates supported by a BF of >5 were considered significant. [file 2978718.f1.zip › 2978718.f1/2978718.f2.kml]

<?xml version="1.0" encoding="UTF-8"?>
<kml xmlns="http://www.opengis.net/kml/2.2">
	<Document>
		<Style id="branch_style1">
			<LineStyle>
				<color>ff1300fa</color>
				<width>4.0</width>
			</LineStyle>
		</Style>
		<Style id="branch_style1">
			<LineStyle>
				<color>ff1300fa</color>
				<width>4.0</width>
			</LineStyle>
		</Style>
		<Style id="branch_style1">
			<LineStyle>
				<color>ff1300fa</color>
				<width>4.0</width>
			</LineStyle>
		</Style>
		<Style id="branch_style1">
			<LineStyle>
				<color>ff1300fa</color>
				<width>4.0</width>
			</LineStyle>
		</Style>
		<Style id="branch_style1">
			<LineStyle>
				<color>ff1300fa</color>
				<width>4.0</width>
			</LineStyle>
		</Style>
		<Style id="branch_style1">
			<LineStyle>
				<color>ff1300fa</color>
				<width>4.0</width>
			</LineStyle>
		</Style>
		<Style id="branch_style1">
			<LineStyle>
				<color>ff1300fa</color>
				<width>4.0</width>
			</LineStyle>
		</Style>
		<Style id="branch_style1">
			<LineStyle>
				<color>ff1300fa</color>
				<width>4.0</width>
			</LineStyle>
		</Style>
		<Style id="branch_style1">
			<LineStyle>
				<color>ff1300fa</color>
				<width>4.0</width>
			</LineStyle>
		</Style>
		<Style id="branch_style1">
			<LineStyle>
				<color>ff1300fa</color>
				<width>4.0</width>
			</LineStyle>
		</Style>
		<Style id="branch_style1">
			<LineStyle>
				<color>ff1300fa</color>
				<width>4.0</width>
			</LineStyle>
		</Style>
		<Style id="branch_style1">
			<LineStyle>
				<color>ff1300fa</color>
				<width>4.0</width>
			</LineStyle>
		</Style>
		<Style id="branch_style1">
			<LineStyle>
				<color>ff1300fa</color>
				<width>4.0</width>
			</LineStyle>
		</Style>
		<Style id="branch_style1">
			<LineStyle>
				<color>ff1300fa</color>
				<width>4.0</width>
			</LineStyle>
		</Style>
		<Style id="branch_style1">
			<LineStyle>
				<color>ff1300fa</color>
				<width>4.0</width>
			</LineStyle>
		</Style>
		<Style id="branch_style1">
			<LineStyle>
				<color>ff1300fa</color>
				<width>4.0</width>
			</LineStyle>
		</Style>
		<Style id="branch_style1">
			<LineStyle>
				<color>ff1300fa</color>
				<width>4.0</width>
			</LineStyle>
		</Style>
		<Style id="branch_style1">
			<LineStyle>
				<color>ff1300fa</color>
				<width>4.0</width>
			</LineStyle>
		</Style>
		<Style id="branch_style1">
			<LineStyle>
				<color>ff1300fa</color>
				<width>4.0</width>
			</LineStyle>
		</Style>
		<Style id="branch_style1">
			<LineStyle>
				<color>ff1300fa</color>
				<width>4.0</width>
			</LineStyle>
		</Style>
		<Style id="branch_style1">
			<LineStyle>
				<color>ff1300fa</color>
				<width>4.0</width>
			</LineStyle>
		</Style>
		<Style id="branch_style1">
			<LineStyle>
				<color>ff1300fa</color>
				<width>4.0</width>
			</LineStyle>
		</Style>
		<Style id="branch_style1">
			<LineStyle>
				<color>ff1300fa</color>
				<width>4.0</width>
			</LineStyle>
		</Style>
		<Style id="branch_style1">
			<LineStyle>
				<color>ff1300fa</color>
				<width>4.0</width>
			</LineStyle>
		</Style>
		<Style id="branch_style1">
			<LineStyle>
				<color>ff1300fa</color>
				<width>4.0</width>
			</LineStyle>
		</Style>
		<Style id="branch_style1">
			<LineStyle>
				<color>ff1300fa</color>
				<width>4.0</width>
			</LineStyle>
		</Style>
		<Style id="branch_style1">
			<LineStyle>
				<color>ff1300fa</color>
				<width>4.0</width>
			</LineStyle>
		</Style>
		<Style id="branch_style1">
			<LineStyle>
				<color>ff1300fa</color>
				<width>4.0</width>
			</LineStyle>
		</Style>
		<Style id="branch_style1">
			<LineStyle>
				<color>ff1300fa</color>
				<width>4.0</width>
			</LineStyle>
		</Style>
		<Style id="branch_style1">
			<LineStyle>
				<color>ff1300fa</color>
				<width>4.0</width>
			</LineStyle>
		</Style>
		<Style id="branch_style1">
			<LineStyle>
				<color>ff1300fa</color>
				<width>4.0</width>
			</LineStyle>
		</Style>
		<Style id="branch_style1">
			<LineStyle>
				<color>ff1300fa</color>
				<width>4.0</width>
			</LineStyle>
		</Style>
		<Style id="branch_style1">
			<LineStyle>
				<color>ff1300fa</color>
				<width>4.0</width>
			</LineStyle>
		</Style>
		<Style id="branch_style1">
			<LineStyle>
				<color>ff1300fa</color>
				<width>4.0</width>
			</LineStyle>
		</Style>
		<Style id="branch_style1">
			<LineStyle>
				<color>ff1300fa</color>
				<width>4.0</width>
			</LineStyle>
		</Style>
		<Style id="branch_style1">
			<LineStyle>
				<color>ff1300fa</color>
				<width>4.0</width>
			</LineStyle>
		</Style>
		<Style id="branch_style1">
			<LineStyle>
				<color>ff1300fa</color>
				<width>4.0</width>
			</LineStyle>
		</Style>
		<Style id="branch_style1">
			<LineStyle>
				<color>ff1300fa</color>
				<width>4.0</width>
			</LineStyle>
		</Style>
		<Style id="branch_style1">
			<LineStyle>
				<color>ff1300fa</color>
				<width>4.0</width>
			</LineStyle>
		</Style>
		<Style id="branch_style1">
			<LineStyle>
				<color>ff1300fa</color>
				<width>4.0</width>
			</LineStyle>
		</Style>
		<Style id="branch_style1">
			<LineStyle>
				<color>ff1300fa</color>
				<width>4.0</width>
			</LineStyle>
		</Style>
		<Style id="branch_style1">
			<LineStyle>
				<color>ff1300fa</color>
				<width>4.0</width>
			</LineStyle>
		</Style>
		<Style id="branch_style1">
			<LineStyle>
				<color>ff1300fa</color>
				<width>4.0</width>
			</LineStyle>
		</Style>
		<Style id="branch_style1">
			<LineStyle>
				<color>ff1300fa</color>
				<width>4.0</width>
			</LineStyle>
		</Style>
		<Style id="branch_style1">
			<LineStyle>
				<color>ff1300fa</color>
				<width>4.0</width>
			</LineStyle>
		</Style>
		<Style id="branch_style1">
			<LineStyle>
				<color>ff1300fa</color>
				<width>4.0</width>
			</LineStyle>
		</Style>
		<Style id="branch_style1">
			<LineStyle>
				<color>ff1300fa</color>
				<width>4.0</width>
			</LineStyle>
		</Style>
		<Style id="branch_style1">
			<LineStyle>
				<color>ff1300fa</color>
				<width>4.0</width>
			</LineStyle>
		</Style>
		<Style id="branch_style1">
			<LineStyle>
				<color>ff1300fa</color>
				<width>4.0</width>
			</LineStyle>
		</Style>
		<Style id="branch_style1">
			<LineStyle>
				<color>ff1300fa</color>
				<width>4.0</width>
			</LineStyle>
		</Style>
		<Style id="branch_style1">
			<LineStyle>
				<color>ff1300fa</color>
				<width>4.0</width>
			</LineStyle>
		</Style>
		<Style id="branch_style1">
			<LineStyle>
				<color>ff1300fa</color>
				<width>4.0</width>
			</LineStyle>
		</Style>
		<Style id="branch_style1">
			<LineStyle>
				<color>ff1300fa</color>
				<width>4.0</width>
			</LineStyle>
		</Style>
		<Style id="branch_style1">
			<LineStyle>
				<color>ff1300fa</color>
				<width>4.0</width>
			</LineStyle>
		</Style>
		<Style id="branch_style1">
			<LineStyle>
				<color>ff1300fa</color>
				<width>4.0</width>
			</LineStyle>
		</Style>
		<Style id="branch_style1">
			<LineStyle>
				<color>ff1300fa</color>
				<width>4.0</width>
			</LineStyle>
		</Style>
		<Style id="branch_style1">
			<LineStyle>
				<color>ff1300fa</color>
				<width>4.0</width>
			</LineStyle>
		</Style>
		<Style id="branch_style1">
			<LineStyle>
				<color>ff1300fa</color>
				<width>4.0</width>
			</LineStyle>
		</Style>
		<Style id="branch_style1">
			<LineStyle>
				<color>ff1300fa</color>
				<width>4.0</width>
			</LineStyle>
		</Style>
		<Style id="branch_style1">
			<LineStyle>
				<color>ff1300fa</color>
				<width>4.0</width>
			</LineStyle>
		</Style>
		<Style id="branch_style1">
			<LineStyle>
				<color>ff1300fa</color>
				<width>4.0</width>
			</LineStyle>
		</Style>
		<Style id="branch_style1">
			<LineStyle>
				<color>ff1300fa</color>
				<width>4.0</width>
			</LineStyle>
		</Style>
		<Style id="branch_style1">
			<LineStyle>
				<color>ff1300fa</color>
				<width>4.0</width>
			</LineStyle>
		</Style>
		<Style id="branch_style1">
			<LineStyle>
				<color>ff1300fa</color>
				<width>4.0</width>
			</LineStyle>
		</Style>
		<Style id="branch_style1">
			<LineStyle>
				<color>ff1300fa</color>
				<width>4.0</width>
			</LineStyle>
		</Style>
		<Style id="branch_style1">
			<LineStyle>
				<color>ff1300fa</color>
				<width>4.0</width>
			</LineStyle>
		</Style>
		<Style id="branch_style1">
			<LineStyle>
				<color>ff1300fa</color>
				<width>4.0</width>
			</LineStyle>
		</Style>
		<Style id="branch_style1">
			<LineStyle>
				<color>ff1300fa</color>
				<width>4.0</width>
			</LineStyle>
		</Style>
		<Style id="branch_style1">
			<LineStyle>
				<color>ff1300fa</color>
				<width>4.0</width>
			</LineStyle>
		</Style>
		<Style id="branch_style1">
			<LineStyle>
				<color>ff1300fa</color>
				<width>4.0</width>
			</LineStyle>
		</Style>
		<Style id="branch_style1">
			<LineStyle>
				<color>ff1300fa</color>
				<width>4.0</width>
			</LineStyle>
		</Style>
		<Style id="branch_style1">
			<LineStyle>
				<color>ff1300fa</color>
				<width>4.0</width>
			</LineStyle>
		</Style>
		<Style id="branch_style1">
			<LineStyle>
				<color>ff1300fa</color>
				<width>4.0</width>
			</LineStyle>
		</Style>
		<Style id="branch_style1">
			<LineStyle>
				<color>ff1300fa</color>
				<width>4.0</width>
			</LineStyle>
		</Style>
		<Style id="branch_style1">
			<LineStyle>
				<color>ff1300fa</color>
				<width>4.0</width>
			</LineStyle>
		</Style>
		<Style id="branch_style1">
			<LineStyle>
				<color>ff1300fa</color>
				<width>4.0</width>
			</LineStyle>
		</Style>
		<Style id="branch_style1">
			<LineStyle>
				<color>ff1300fa</color>
				<width>4.0</width>
			</LineStyle>
		</Style>
		<Style id="branch_style1">
			<LineStyle>
				<color>ff1300fa</color>
				<width>4.0</width>
			</LineStyle>
		</Style>
		<Style id="branch_style1">
			<LineStyle>
				<color>ff1300fa</color>
				<width>4.0</width>
			</LineStyle>
		</Style>
		<Style id="branch_style1">
			<LineStyle>
				<color>ff1300fa</color>
				<width>4.0</width>
			</LineStyle>
		</Style>
		<Style id="branch_style1">
			<LineStyle>
				<color>ff1300fa</color>
				<width>4.0</width>
			</LineStyle>
		</Style>
		<Style id="branch_style1">
			<LineStyle>
				<color>ff1300fa</color>
				<width>4.0</width>
			</LineStyle>
		</Style>
		<Style id="branch_style1">
			<LineStyle>
				<color>ff1300fa</color>
				<width>4.0</width>
			</LineStyle>
		</Style>
		<Style id="branch_style1">
			<LineStyle>
				<color>ff1300fa</color>
				<width>4.0</width>
			</LineStyle>
		</Style>
		<Style id="branch_style1">
			<LineStyle>
				<color>ff1300fa</color>
				<width>4.0</width>
			</LineStyle>
		</Style>
		<Style id="branch_style1">
			<LineStyle>
				<color>ff1300fa</color>
				<width>4.0</width>
			</LineStyle>
		</Style>
		<Style id="branch_style1">
			<LineStyle>
				<color>ff1300fa</color>
				<width>4.0</width>
			</LineStyle>
		</Style>
		<Style id="branch_style1">
			<LineStyle>
				<color>ff1300fa</color>
				<width>4.0</width>
			</LineStyle>
		</Style>
		<Style id="branch_style1">
			<LineStyle>
				<color>ff1300fa</color>
				<width>4.0</width>
			</LineStyle>
		</Style>
		<Style id="branch_style1">
			<LineStyle>
				<color>ff1300fa</color>
				<width>4.0</width>
			</LineStyle>
		</Style>
		<Style id="branch_style1">
			<LineStyle>
				<color>ff1300fa</color>
				<width>4.0</width>
			</LineStyle>
		</Style>
		<Style id="branch_style1">
			<LineStyle>
				<color>ff1300fa</color>
				<width>4.0</width>
			</LineStyle>
		</Style>
		<Style id="branch_style1">
			<LineStyle>
				<color>ff1300fa</color>
				<width>4.0</width>
			</LineStyle>
		</Style>
		<Style id="branch_style1">
			<LineStyle>
				<color>ff1300fa</color>
				<width>4.0</width>
			</LineStyle>
		</Style>
		<Style id="branch_style1">
			<LineStyle>
				<color>ff1300fa</color>
				<width>4.0</width>
			</LineStyle>
		</Style>
		<Style id="branch_style1">
			<LineStyle>
				<color>ff1300fa</color>
				<width>4.0</width>
			</LineStyle>
		</Style>
		<Style id="branch_style1">
			<LineStyle>
				<color>ff1300fa</color>
				<width>4.0</width>
			</LineStyle>
		</Style>
		<Style id="branch_style1">
			<LineStyle>
				<color>ff1300fa</color>
				<width>4.0</width>
			</LineStyle>
		</Style>
		<Style id="branch_style1">
			<LineStyle>
				<color>ff1300fa</color>
				<width>4.0</width>
			</LineStyle>
		</Style>
		<Style id="branch_style1">
			<LineStyle>
				<color>ff1300fa</color>
				<width>4.0</width>
			</LineStyle>
		</Style>
		<Style id="branch_style2">
			<LineStyle>
				<color>ff1a01fb</color>
				<width>4.0</width>
			</LineStyle>
		</Style>
		<Style id="branch_style2">
			<LineStyle>
				<color>ff1a01fb</color>
				<width>4.0</width>
			</LineStyle>
		</Style>
		<Style id="branch_style2">
			<LineStyle>
				<color>ff1a01fb</color>
				<width>4.0</width>
			</LineStyle>
		</Style>
		<Style id="branch_style2">
			<LineStyle>
				<color>ff1a01fb</color>
				<width>4.0</width>
			</LineStyle>
		</Style>
		<Style id="branch_style2">
			<LineStyle>
				<color>ff1a01fb</color>
				<width>4.0</width>
			</LineStyle>
		</Style>
		<Style id="branch_style2">
			<LineStyle>
				<color>ff1a01fb</color>
				<width>4.0</width>
			</LineStyle>
		</Style>
		<Style id="branch_style2">
			<LineStyle>
				<color>ff1a01fb</color>
				<width>4.0</width>
			</LineStyle>
		</Style>
		<Style id="branch_style2">
			<LineStyle>
				<color>ff1a01fb</color>
				<width>4.0</width>
			</LineStyle>
		</Style>
		<Style id="branch_style2">
			<LineStyle>
				<color>ff1a01fb</color>
				<width>4.0</width>
			</LineStyle>
		</Style>
		<Style id="branch_style2">
			<LineStyle>
				<color>ff1a01fb</color>
				<width>4.0</width>
			</LineStyle>
		</Style>
		<Style id="branch_style2">
			<LineStyle>
				<color>ff1a01fb</color>
				<width>4.0</width>
			</LineStyle>
		</Style>
		<Style id="branch_style2">
			<LineStyle>
				<color>ff1a01fb</color>
				<width>4.0</width>
			</LineStyle>
		</Style>
		<Style id="branch_style2">
			<LineStyle>
				<color>ff1a01fb</color>
				<width>4.0</width>
			</LineStyle>
		</Style>
		<Style id="branch_style2">
			<LineStyle>
				<color>ff1a01fb</color>
				<width>4.0</width>
			</LineStyle>
		</Style>
		<Style id="branch_style2">
			<LineStyle>
				<color>ff1a01fb</color>
				<width>4.0</width>
			</LineStyle>
		</Style>
		<Style id="branch_style2">
			<LineStyle>
				<color>ff1a01fb</color>
				<width>4.0</width>
			</LineStyle>
		</Style>
		<Style id="branch_style2">
			<LineStyle>
				<color>ff1a01fb</color>
				<width>4.0</width>
			</LineStyle>
		</Style>
		<Style id="branch_style2">
			<LineStyle>
				<color>ff1a01fb</color>
				<width>4.0</width>
			</LineStyle>
		</Style>
		<Style id="branch_style2">
			<LineStyle>
				<color>ff1a01fb</color>
				<width>4.0</width>
			</LineStyle>
		</Style>
		<Style id="branch_style2">
			<LineStyle>
				<color>ff1a01fb</color>
				<width>4.0</width>
			</LineStyle>
		</Style>
		<Style id="branch_style2">
			<LineStyle>
				<color>ff1a01fb</color>
				<width>4.0</width>
			</LineStyle>
		</Style>
		<Style id="branch_style2">
			<LineStyle>
				<color>ff1a01fb</color>
				<width>4.0</width>
			</LineStyle>
		</Style>
		<Style id="branch_style2">
			<LineStyle>
				<color>ff1a01fb</color>
				<width>4.0</width>
			</LineStyle>
		</Style>
		<Style id="branch_style2">
			<LineStyle>
				<color>ff1a01fb</color>
				<width>4.0</width>
			</LineStyle>
		</Style>
		<Style id="branch_style2">
			<LineStyle>
				<color>ff1a01fb</color>
				<width>4.0</width>
			</LineStyle>
		</Style>
		<Style id="branch_style2">
			<LineStyle>
				<color>ff1a01fb</color>
				<width>4.0</width>
			</LineStyle>
		</Style>
		<Style id="branch_style2">
			<LineStyle>
				<color>ff1a01fb</color>
				<width>4.0</width>
			</LineStyle>
		</Style>
		<Style id="branch_style2">
			<LineStyle>
				<color>ff1a01fb</color>
				<width>4.0</width>
			</LineStyle>
		</Style>
		<Style id="branch_style2">
			<LineStyle>
				<color>ff1a01fb</color>
				<width>4.0</width>
			</LineStyle>
		</Style>
		<Style id="branch_style2">
			<LineStyle>
				<color>ff1a01fb</color>
				<width>4.0</width>
			</LineStyle>
		</Style>
		<Style id="branch_style2">
			<LineStyle>
				<color>ff1a01fb</color>
				<width>4.0</width>
			</LineStyle>
		</Style>
		<Style id="branch_style2">
			<LineStyle>
				<color>ff1a01fb</color>
				<width>4.0</width>
			</LineStyle>
		</Style>
		<Style id="branch_style2">
			<LineStyle>
				<color>ff1a01fb</color>
				<width>4.0</width>
			</LineStyle>
		</Style>
		<Style id="branch_style2">
			<LineStyle>
				<color>ff1a01fb</color>
				<width>4.0</width>
			</LineStyle>
		</Style>
		<Style id="branch_style2">
			<LineStyle>
				<color>ff1a01fb</color>
				<width>4.0</width>
			</LineStyle>
		</Style>
		<Style id="branch_style2">
			<LineStyle>
				<color>ff1a01fb</color>
				<width>4.0</width>
			</LineStyle>
		</Style>
		<Style id="branch_style2">
			<LineStyle>
				<color>ff1a01fb</color>
				<width>4.0</width>
			</LineStyle>
		</Style>
		<Style id="branch_style2">
			<LineStyle>
				<color>ff1a01fb</color>
				<width>4.0</width>
			</LineStyle>
		</Style>
		<Style id="branch_style2">
			<LineStyle>
				<color>ff1a01fb</color>
				<width>4.0</width>
			</LineStyle>
		</Style>
		<Style id="branch_style2">
			<LineStyle>
				<color>ff1a01fb</color>
				<width>4.0</width>
			</LineStyle>
		</Style>
		<Style id="branch_style2">
			<LineStyle>
				<color>ff1a01fb</color>
				<width>4.0</width>
			</LineStyle>
		</Style>
		<Style id="branch_style2">
			<LineStyle>
				<color>ff1a01fb</color>
				<width>4.0</width>
			</LineStyle>
		</Style>
		<Style id="branch_style2">
			<LineStyle>
				<color>ff1a01fb</color>
				<width>4.0</width>
			</LineStyle>
		</Style>
		<Style id="branch_style2">
			<LineStyle>
				<color>ff1a01fb</color>
				<width>4.0</width>
			</LineStyle>
		</Style>
		<Style id="branch_style2">
			<LineStyle>
				<color>ff1a01fb</color>
				<width>4.0</width>
			</LineStyle>
		</Style>
		<Style id="branch_style2">
			<LineStyle>
				<color>ff1a01fb</color>
				<width>4.0</width>
			</LineStyle>
		</Style>
		<Style id="branch_style2">
			<LineStyle>
				<color>ff1a01fb</color>
				<width>4.0</width>
			</LineStyle>
		</Style>
		<Style id="branch_style2">
			<LineStyle>
				<color>ff1a01fb</color>
				<width>4.0</width>
			</LineStyle>
		</Style>
		<Style id="branch_style2">
			<LineStyle>
				<color>ff1a01fb</color>
				<width>4.0</width>
			</LineStyle>
		</Style>
		<Style id="branch_style2">
			<LineStyle>
				<color>ff1a01fb</color>
				<width>4.0</width>
			</LineStyle>
		</Style>
		<Style id="branch_style2">
			<LineStyle>
				<color>ff1a01fb</color>
				<width>4.0</width>
			</LineStyle>
		</Style>
		<Style id="branch_style2">
			<LineStyle>
				<color>ff1a01fb</color>
				<width>4.0</width>
			</LineStyle>
		</Style>
		<Style id="branch_style2">
			<LineStyle>
				<color>ff1a01fb</color>
				<width>4.0</width>
			</LineStyle>
		</Style>
		<Style id="branch_style2">
			<LineStyle>
				<color>ff1a01fb</color>
				<width>4.0</width>
			</LineStyle>
		</Style>
		<Style id="branch_style2">
			<LineStyle>
				<color>ff1a01fb</color>
				<width>4.0</width>
			</LineStyle>
		</Style>
		<Style id="branch_style2">
			<LineStyle>
				<color>ff1a01fb</color>
				<width>4.0</width>
			</LineStyle>
		</Style>
		<Style id="branch_style2">
			<LineStyle>
				<color>ff1a01fb</color>
				<width>4.0</width>
			</LineStyle>
		</Style>
		<Style id="branch_style2">
			<LineStyle>
				<color>ff1a01fb</color>
				<width>4.0</width>
			</LineStyle>
		</Style>
		<Style id="branch_style2">
			<LineStyle>
				<color>ff1a01fb</color>
				<width>4.0</width>
			</LineStyle>
		</Style>
		<Style id="branch_style2">
			<LineStyle>
				<color>ff1a01fb</color>
				<width>4.0</width>
			</LineStyle>
		</Style>
		<Style id="branch_style2">
			<LineStyle>
				<color>ff1a01fb</color>
				<width>4.0</width>
			</LineStyle>
		</Style>
		<Style id="branch_style2">
			<LineStyle>
				<color>ff1a01fb</color>
				<width>4.0</width>
			</LineStyle>
		</Style>
		<Style id="branch_style2">
			<LineStyle>
				<color>ff1a01fb</color>
				<width>4.0</width>
			</LineStyle>
		</Style>
		<Style id="branch_style2">
			<LineStyle>
				<color>ff1a01fb</color>
				<width>4.0</width>
			</LineStyle>
		</Style>
		<Style id="branch_style2">
			<LineStyle>
				<color>ff1a01fb</color>
				<width>4.0</width>
			</LineStyle>
		</Style>
		<Style id="branch_style2">
			<LineStyle>
				<color>ff1a01fb</color>
				<width>4.0</width>
			</LineStyle>
		</Style>
		<Style id="branch_style2">
			<LineStyle>
				<color>ff1a01fb</color>
				<width>4.0</width>
			</LineStyle>
		</Style>
		<Style id="branch_style2">
			<LineStyle>
				<color>ff1a01fb</color>
				<width>4.0</width>
			</LineStyle>
		</Style>
		<Style id="branch_style2">
			<LineStyle>
				<color>ff1a01fb</color>
				<width>4.0</width>
			</LineStyle>
		</Style>
		<Style id="branch_style2">
			<LineStyle>
				<color>ff1a01fb</color>
				<width>4.0</width>
			</LineStyle>
		</Style>
		<Style id="branch_style2">
			<LineStyle>
				<color>ff1a01fb</color>
				<width>4.0</width>
			</LineStyle>
		</Style>
		<Style id="branch_style2">
			<LineStyle>
				<color>ff1a01fb</color>
				<width>4.0</width>
			</LineStyle>
		</Style>
		<Style id="branch_style2">
			<LineStyle>
				<color>ff1a01fb</color>
				<width>4.0</width>
			</LineStyle>
		</Style>
		<Style id="branch_style2">
			<LineStyle>
				<color>ff1a01fb</color>
				<width>4.0</width>
			</LineStyle>
		</Style>
		<Style id="branch_style2">
			<LineStyle>
				<color>ff1a01fb</color>
				<width>4.0</width>
			</LineStyle>
		</Style>
		<Style id="branch_style2">
			<LineStyle>
				<color>ff1a01fb</color>
				<width>4.0</width>
			</LineStyle>
		</Style>
		<Style id="branch_style2">
			<LineStyle>
				<color>ff1a01fb</color>
				<width>4.0</width>
			</LineStyle>
		</Style>
		<Style id="branch_style2">
			<LineStyle>
				<color>ff1a01fb</color>
				<width>4.0</width>
			</LineStyle>
		</Style>
		<Style id="branch_style2">
			<LineStyle>
				<color>ff1a01fb</color>
				<width>4.0</width>
			</LineStyle>
		</Style>
		<Style id="branch_style2">
			<LineStyle>
				<color>ff1a01fb</color>
				<width>4.0</width>
			</LineStyle>
		</Style>
		<Style id="branch_style2">
			<LineStyle>
				<color>ff1a01fb</color>
				<width>4.0</width>
			</LineStyle>
		</Style>
		<Style id="branch_style2">
			<LineStyle>
				<color>ff1a01fb</color>
				<width>4.0</width>
			</LineStyle>
		</Style>
		<Style id="branch_style2">
			<LineStyle>
				<color>ff1a01fb</color>
				<width>4.0</width>
			</LineStyle>
		</Style>
		<Style id="branch_style2">
			<LineStyle>
				<color>ff1a01fb</color>
				<width>4.0</width>
			</LineStyle>
		</Style>
		<Style id="branch_style2">
			<LineStyle>
				<color>ff1a01fb</color>
				<width>4.0</width>
			</LineStyle>
		</Style>
		<Style id="branch_style2">
			<LineStyle>
				<color>ff1a01fb</color>
				<width>4.0</width>
			</LineStyle>
		</Style>
		<Style id="branch_style2">
			<LineStyle>
				<color>ff1a01fb</color>
				<width>4.0</width>
			</LineStyle>
		</Style>
		<Style id="branch_style2">
			<LineStyle>
				<color>ff1a01fb</color>
				<width>4.0</width>
			</LineStyle>
		</Style>
		<Style id="branch_style2">
			<LineStyle>
				<color>ff1a01fb</color>
				<width>4.0</width>
			</LineStyle>
		</Style>
		<Style id="branch_style2">
			<LineStyle>
				<color>ff1a01fb</color>
				<width>4.0</width>
			</LineStyle>
		</Style>
		<Style id="branch_style2">
			<LineStyle>
				<color>ff1a01fb</color>
				<width>4.0</width>
			</LineStyle>
		</Style>
		<Style id="branch_style2">
			<LineStyle>
				<color>ff1a01fb</color>
				<width>4.0</width>
			</LineStyle>
		</Style>
		<Style id="branch_style2">
			<LineStyle>
				<color>ff1a01fb</color>
				<width>4.0</width>
			</LineStyle>
		</Style>
		<Style id="branch_style2">
			<LineStyle>
				<color>ff1a01fb</color>
				<width>4.0</width>
			</LineStyle>
		</Style>
		<Style id="branch_style2">
			<LineStyle>
				<color>ff1a01fb</color>
				<width>4.0</width>
			</LineStyle>
		</Style>
		<Style id="branch_style2">
			<LineStyle>
				<color>ff1a01fb</color>
				<width>4.0</width>
			</LineStyle>
		</Style>
		<Style id="branch_style2">
			<LineStyle>
				<color>ff1a01fb</color>
				<width>4.0</width>
			</LineStyle>
		</Style>
		<Style id="branch_style2">
			<LineStyle>
				<color>ff1a01fb</color>
				<width>4.0</width>
			</LineStyle>
		</Style>
		<Style id="branch_style2">
			<LineStyle>
				<color>ff1a01fb</color>
				<width>4.0</width>
			</LineStyle>
		</Style>
		<Style id="branch_style2">
			<LineStyle>
				<color>ff1a01fb</color>
				<width>4.0</width>
			</LineStyle>
		</Style>
		<Style id="branch_style3">
			<LineStyle>
				<color>ff0e00fa</color>
				<width>4.0</width>
			</LineStyle>
		</Style>
		<Style id="branch_style3">
			<LineStyle>
				<color>ff0e00fa</color>
				<width>4.0</width>
			</LineStyle>
		</Style>
		<Style id="branch_style3">
			<LineStyle>
				<color>ff0e00fa</color>
				<width>4.0</width>
			</LineStyle>
		</Style>
		<Style id="branch_style3">
			<LineStyle>
				<color>ff0e00fa</color>
				<width>4.0</width>
			</LineStyle>
		</Style>
		<Style id="branch_style3">
			<LineStyle>
				<color>ff0e00fa</color>
				<width>4.0</width>
			</LineStyle>
		</Style>
		<Style id="branch_style3">
			<LineStyle>
				<color>ff0e00fa</color>
				<width>4.0</width>
			</LineStyle>
		</Style>
		<Style id="branch_style3">
			<LineStyle>
				<color>ff0e00fa</color>
				<width>4.0</width>
			</LineStyle>
		</Style>
		<Style id="branch_style3">
			<LineStyle>
				<color>ff0e00fa</color>
				<width>4.0</width>
			</LineStyle>
		</Style>
		<Style id="branch_style3">
			<LineStyle>
				<color>ff0e00fa</color>
				<width>4.0</width>
			</LineStyle>
		</Style>
		<Style id="branch_style3">
			<LineStyle>
				<color>ff0e00fa</color>
				<width>4.0</width>
			</LineStyle>
		</Style>
		<Style id="branch_style3">
			<LineStyle>
				<color>ff0e00fa</color>
				<width>4.0</width>
			</LineStyle>
		</Style>
		<Style id="branch_style3">
			<LineStyle>
				<color>ff0e00fa</color>
				<width>4.0</width>
			</LineStyle>
		</Style>
		<Style id="branch_style3">
			<LineStyle>
				<color>ff0e00fa</color>
				<width>4.0</width>
			</LineStyle>
		</Style>
		<Style id="branch_style3">
			<LineStyle>
				<color>ff0e00fa</color>
				<width>4.0</width>
			</LineStyle>
		</Style>
		<Style id="branch_style3">
			<LineStyle>
				<color>ff0e00fa</color>
				<width>4.0</width>
			</LineStyle>
		</Style>
		<Style id="branch_style3">
			<LineStyle>
				<color>ff0e00fa</color>
				<width>4.0</width>
			</LineStyle>
		</Style>
		<Style id="branch_style3">
			<LineStyle>
				<color>ff0e00fa</color>
				<width>4.0</width>
			</LineStyle>
		</Style>
		<Style id="branch_style3">
			<LineStyle>
				<color>ff0e00fa</color>
				<width>4.0</width>
			</LineStyle>
		</Style>
		<Style id="branch_style3">
			<LineStyle>
				<color>ff0e00fa</color>
				<width>4.0</width>
			</LineStyle>
		</Style>
		<Style id="branch_style3">
			<LineStyle>
				<color>ff0e00fa</color>
				<width>4.0</width>
			</LineStyle>
		</Style>
		<Style id="branch_style3">
			<LineStyle>
				<color>ff0e00fa</color>
				<width>4.0</width>
			</LineStyle>
		</Style>
		<Style id="branch_style3">
			<LineStyle>
				<color>ff0e00fa</color>
				<width>4.0</width>
			</LineStyle>
		</Style>
		<Style id="branch_style3">
			<LineStyle>
				<color>ff0e00fa</color>
				<width>4.0</width>
			</LineStyle>
		</Style>
		<Style id="branch_style3">
			<LineStyle>
				<color>ff0e00fa</color>
				<width>4.0</width>
			</LineStyle>
		</Style>
		<Style id="branch_style3">
			<LineStyle>
				<color>ff0e00fa</color>
				<width>4.0</width>
			</LineStyle>
		</Style>
		<Style id="branch_style3">
			<LineStyle>
				<color>ff0e00fa</color>
				<width>4.0</width>
			</LineStyle>
		</Style>
		<Style id="branch_style3">
			<LineStyle>
				<color>ff0e00fa</color>
				<width>4.0</width>
			</LineStyle>
		</Style>
		<Style id="branch_style3">
			<LineStyle>
				<color>ff0e00fa</color>
				<width>4.0</width>
			</LineStyle>
		</Style>
		<Style id="branch_style3">
			<LineStyle>
				<color>ff0e00fa</color>
				<width>4.0</width>
			</LineStyle>
		</Style>
		<Style id="branch_style3">
			<LineStyle>
				<color>ff0e00fa</color>
				<width>4.0</width>
			</LineStyle>
		</Style>
		<Style id="branch_style3">
			<LineStyle>
				<color>ff0e00fa</color>
				<width>4.0</width>
			</LineStyle>
		</Style>
		<Style id="branch_style3">
			<LineStyle>
				<color>ff0e00fa</color>
				<width>4.0</width>
			</LineStyle>
		</Style>
		<Style id="branch_style3">
			<LineStyle>
				<color>ff0e00fa</color>
				<width>4.0</width>
			</LineStyle>
		</Style>
		<Style id="branch_style3">
			<LineStyle>
				<color>ff0e00fa</color>
				<width>4.0</width>
			</LineStyle>
		</Style>
		<Style id="branch_style3">
			<LineStyle>
				<color>ff0e00fa</color>
				<width>4.0</width>
			</LineStyle>
		</Style>
		<Style id="branch_style3">
			<LineStyle>
				<color>ff0e00fa</color>
				<width>4.0</width>
			</LineStyle>
		</Style>
		<Style id="branch_style3">
			<LineStyle>
				<color>ff0e00fa</color>
				<width>4.0</width>
			</LineStyle>
		</Style>
		<Style id="branch_style3">
			<LineStyle>
				<color>ff0e00fa</color>
				<width>4.0</width>
			</LineStyle>
		</Style>
		<Style id="branch_style3">
			<LineStyle>
				<color>ff0e00fa</color>
				<width>4.0</width>
			</LineStyle>
		</Style>
		<Style id="branch_style3">
			<LineStyle>
				<color>ff0e00fa</color>
				<width>4.0</width>
			</LineStyle>
		</Style>
		<Style id="branch_style3">
			<LineStyle>
				<color>ff0e00fa</color>
				<width>4.0</width>
			</LineStyle>
		</Style>
		<Style id="branch_style3">
			<LineStyle>
				<color>ff0e00fa</color>
				<width>4.0</width>
			</LineStyle>
		</Style>
		<Style id="branch_style3">
			<LineStyle>
				<color>ff0e00fa</color>
				<width>4.0</width>
			</LineStyle>
		</Style>
		<Style id="branch_style3">
			<LineStyle>
				<color>ff0e00fa</color>
				<width>4.0</width>
			</LineStyle>
		</Style>
		<Style id="branch_style3">
			<LineStyle>
				<color>ff0e00fa</color>
				<width>4.0</width>
			</LineStyle>
		</Style>
		<Style id="branch_style3">
			<LineStyle>
				<color>ff0e00fa</color>
				<width>4.0</width>
			</LineStyle>
		</Style>
		<Style id="branch_style3">
			<LineStyle>
				<color>ff0e00fa</color>
				<width>4.0</width>
			</LineStyle>
		</Style>
		<Style id="branch_style3">
			<LineStyle>
				<color>ff0e00fa</color>
				<width>4.0</width>
			</LineStyle>
		</Style>
		<Style id="branch_style3">
			<LineStyle>
				<color>ff0e00fa</color>
				<width>4.0</width>
			</LineStyle>
		</Style>
		<Style id="branch_style3">
			<LineStyle>
				<color>ff0e00fa</color>
				<width>4.0</width>
			</LineStyle>
		</Style>
		<Style id="branch_style3">
			<LineStyle>
				<color>ff0e00fa</color>
				<width>4.0</width>
			</LineStyle>
		</Style>
		<Style id="branch_style3">
			<LineStyle>
				<color>ff0e00fa</color>
				<width>4.0</width>
			</LineStyle>
		</Style>
		<Style id="branch_style3">
			<LineStyle>
				<color>ff0e00fa</color>
				<width>4.0</width>
			</LineStyle>
		</Style>
		<Style id="branch_style3">
			<LineStyle>
				<color>ff0e00fa</color>
				<width>4.0</width>
			</LineStyle>
		</Style>
		<Style id="branch_style3">
			<LineStyle>
				<color>ff0e00fa</color>
				<width>4.0</width>
			</LineStyle>
		</Style>
		<Style id="branch_style3">
			<LineStyle>
				<color>ff0e00fa</color>
				<width>4.0</width>
			</LineStyle>
		</Style>
		<Style id="branch_style3">
			<LineStyle>
				<color>ff0e00fa</color>
				<width>4.0</width>
			</LineStyle>
		</Style>
		<Style id="branch_style3">
			<LineStyle>
				<color>ff0e00fa</color>
				<width>4.0</width>
			</LineStyle>
		</Style>
		<Style id="branch_style3">
			<LineStyle>
				<color>ff0e00fa</color>
				<width>4.0</width>
			</LineStyle>
		</Style>
		<Style id="branch_style3">
			<LineStyle>
				<color>ff0e00fa</color>
				<width>4.0</width>
			</LineStyle>
		</Style>
		<Style id="branch_style3">
			<LineStyle>
				<color>ff0e00fa</color>
				<width>4.0</width>
			</LineStyle>
		</Style>
		<Style id="branch_style3">
			<LineStyle>
				<color>ff0e00fa</color>
				<width>4.0</width>
			</LineStyle>
		</Style>
		<Style id="branch_style3">
			<LineStyle>
				<color>ff0e00fa</color>
				<width>4.0</width>
			</LineStyle>
		</Style>
		<Style id="branch_style3">
			<LineStyle>
				<color>ff0e00fa</color>
				<width>4.0</width>
			</LineStyle>
		</Style>
		<Style id="branch_style3">
			<LineStyle>
				<color>ff0e00fa</color>
				<width>4.0</width>
			</LineStyle>
		</Style>
		<Style id="branch_style3">
			<LineStyle>
				<color>ff0e00fa</color>
				<width>4.0</width>
			</LineStyle>
		</Style>
		<Style id="branch_style3">
			<LineStyle>
				<color>ff0e00fa</color>
				<width>4.0</width>
			</LineStyle>
		</Style>
		<Style id="branch_style3">
			<LineStyle>
				<color>ff0e00fa</color>
				<width>4.0</width>
			</LineStyle>
		</Style>
		<Style id="branch_style3">
			<LineStyle>
				<color>ff0e00fa</color>
				<width>4.0</width>
			</LineStyle>
		</Style>
		<Style id="branch_style3">
			<LineStyle>
				<color>ff0e00fa</color>
				<width>4.0</width>
			</LineStyle>
		</Style>
		<Style id="branch_style3">
			<LineStyle>
				<color>ff0e00fa</color>
				<width>4.0</width>
			</LineStyle>
		</Style>
		<Style id="branch_style3">
			<LineStyle>
				<color>ff0e00fa</color>
				<width>4.0</width>
			</LineStyle>
		</Style>
		<Style id="branch_style3">
			<LineStyle>
				<color>ff0e00fa</color>
				<width>4.0</width>
			</LineStyle>
		</Style>
		<Style id="branch_style3">
			<LineStyle>
				<color>ff0e00fa</color>
				<width>4.0</width>
			</LineStyle>
		</Style>
		<Style id="branch_style3">
			<LineStyle>
				<color>ff0e00fa</color>
				<width>4.0</width>
			</LineStyle>
		</Style>
		<Style id="branch_style3">
			<LineStyle>
				<color>ff0e00fa</color>
				<width>4.0</width>
			</LineStyle>
		</Style>
		<Style id="branch_style3">
			<LineStyle>
				<color>ff0e00fa</color>
				<width>4.0</width>
			</LineStyle>
		</Style>
		<Style id="branch_style3">
			<LineStyle>
				<color>ff0e00fa</color>
				<width>4.0</width>
			</LineStyle>
		</Style>
		<Style id="branch_style3">
			<LineStyle>
				<color>ff0e00fa</color>
				<width>4.0</width>
			</LineStyle>
		</Style>
		<Style id="branch_style3">
			<LineStyle>
				<color>ff0e00fa</color>
				<width>4.0</width>
			</LineStyle>
		</Style>
		<Style id="branch_style3">
			<LineStyle>
				<color>ff0e00fa</color>
				<width>4.0</width>
			</LineStyle>
		</Style>
		<Style id="branch_style3">
			<LineStyle>
				<color>ff0e00fa</color>
				<width>4.0</width>
			</LineStyle>
		</Style>
		<Style id="branch_style3">
			<LineStyle>
				<color>ff0e00fa</color>
				<width>4.0</width>
			</LineStyle>
		</Style>
		<Style id="branch_style3">
			<LineStyle>
				<color>ff0e00fa</color>
				<width>4.0</width>
			</LineStyle>
		</Style>
		<Style id="branch_style3">
			<LineStyle>
				<color>ff0e00fa</color>
				<width>4.0</width>
			</LineStyle>
		</Style>
		<Style id="branch_style3">
			<LineStyle>
				<color>ff0e00fa</color>
				<width>4.0</width>
			</LineStyle>
		</Style>
		<Style id="branch_style3">
			<LineStyle>
				<color>ff0e00fa</color>
				<width>4.0</width>
			</LineStyle>
		</Style>
		<Style id="branch_style3">
			<LineStyle>
				<color>ff0e00fa</color>
				<width>4.0</width>
			</LineStyle>
		</Style>
		<Style id="branch_style3">
			<LineStyle>
				<color>ff0e00fa</color>
				<width>4.0</width>
			</LineStyle>
		</Style>
		<Style id="branch_style3">
			<LineStyle>
				<color>ff0e00fa</color>
				<width>4.0</width>
			</LineStyle>
		</Style>
		<Style id="branch_style3">
			<LineStyle>
				<color>ff0e00fa</color>
				<width>4.0</width>
			</LineStyle>
		</Style>
		<Style id="branch_style3">
			<LineStyle>
				<color>ff0e00fa</color>
				<width>4.0</width>
			</LineStyle>
		</Style>
		<Style id="branch_style3">
			<LineStyle>
				<color>ff0e00fa</color>
				<width>4.0</width>
			</LineStyle>
		</Style>
		<Style id="branch_style3">
			<LineStyle>
				<color>ff0e00fa</color>
				<width>4.0</width>
			</LineStyle>
		</Style>
		<Style id="branch_style3">
			<LineStyle>
				<color>ff0e00fa</color>
				<width>4.0</width>
			</LineStyle>
		</Style>
		<Style id="branch_style3">
			<LineStyle>
				<color>ff0e00fa</color>
				<width>4.0</width>
			</LineStyle>
		</Style>
		<Style id="branch_style3">
			<LineStyle>
				<color>ff0e00fa</color>
				<width>4.0</width>
			</LineStyle>
		</Style>
		<Style id="branch_style3">
			<LineStyle>
				<color>ff0e00fa</color>
				<width>4.0</width>
			</LineStyle>
		</Style>
		<Style id="branch_style3">
			<LineStyle>
				<color>ff0e00fa</color>
				<width>4.0</width>
			</LineStyle>
		</Style>
		<Style id="branch_style3">
			<LineStyle>
				<color>ff0e00fa</color>
				<width>4.0</width>
			</LineStyle>
		</Style>
		<Style id="branch_style4">
			<LineStyle>
				<color>ff0e00fa</color>
				<width>4.0</width>
			</LineStyle>
		</Style>
		<Style id="branch_style4">
			<LineStyle>
				<color>ff0e00fa</color>
				<width>4.0</width>
			</LineStyle>
		</Style>
		<Style id="branch_style4">
			<LineStyle>
				<color>ff0e00fa</color>
				<width>4.0</width>
			</LineStyle>
		</Style>
		<Style id="branch_style4">
			<LineStyle>
				<color>ff0e00fa</color>
				<width>4.0</width>
			</LineStyle>
		</Style>
		<Style id="branch_style4">
			<LineStyle>
				<color>ff0e00fa</color>
				<width>4.0</width>
			</LineStyle>
		</Style>
		<Style id="branch_style4">
			<LineStyle>
				<color>ff0e00fa</color>
				<width>4.0</width>
			</LineStyle>
		</Style>
		<Style id="branch_style4">
			<LineStyle>
				<color>ff0e00fa</color>
				<width>4.0</width>
			</LineStyle>
		</Style>
		<Style id="branch_style4">
			<LineStyle>
				<color>ff0e00fa</color>
				<width>4.0</width>
			</LineStyle>
		</Style>
		<Style id="branch_style4">
			<LineStyle>
				<color>ff0e00fa</color>
				<width>4.0</width>
			</LineStyle>
		</Style>
		<Style id="branch_style4">
			<LineStyle>
				<color>ff0e00fa</color>
				<width>4.0</width>
			</LineStyle>
		</Style>
		<Style id="branch_style4">
			<LineStyle>
				<color>ff0e00fa</color>
				<width>4.0</width>
			</LineStyle>
		</Style>
		<Style id="branch_style4">
			<LineStyle>
				<color>ff0e00fa</color>
				<width>4.0</width>
			</LineStyle>
		</Style>
		<Style id="branch_style4">
			<LineStyle>
				<color>ff0e00fa</color>
				<width>4.0</width>
			</LineStyle>
		</Style>
		<Style id="branch_style4">
			<LineStyle>
				<color>ff0e00fa</color>
				<width>4.0</width>
			</LineStyle>
		</Style>
		<Style id="branch_style4">
			<LineStyle>
				<color>ff0e00fa</color>
				<width>4.0</width>
			</LineStyle>
		</Style>
		<Style id="branch_style4">
			<LineStyle>
				<color>ff0e00fa</color>
				<width>4.0</width>
			</LineStyle>
		</Style>
		<Style id="branch_style4">
			<LineStyle>
				<color>ff0e00fa</color>
				<width>4.0</width>
			</LineStyle>
		</Style>
		<Style id="branch_style4">
			<LineStyle>
				<color>ff0e00fa</color>
				<width>4.0</width>
			</LineStyle>
		</Style>
		<Style id="branch_style4">
			<LineStyle>
				<color>ff0e00fa</color>
				<width>4.0</width>
			</LineStyle>
		</Style>
		<Style id="branch_style4">
			<LineStyle>
				<color>ff0e00fa</color>
				<width>4.0</width>
			</LineStyle>
		</Style>
		<Style id="branch_style4">
			<LineStyle>
				<color>ff0e00fa</color>
				<width>4.0</width>
			</LineStyle>
		</Style>
		<Style id="branch_style4">
			<LineStyle>
				<color>ff0e00fa</color>
				<width>4.0</width>
			</LineStyle>
		</Style>
		<Style id="branch_style4">
			<LineStyle>
				<color>ff0e00fa</color>
				<width>4.0</width>
			</LineStyle>
		</Style>
		<Style id="branch_style4">
			<LineStyle>
				<color>ff0e00fa</color>
				<width>4.0</width>
			</LineStyle>
		</Style>
		<Style id="branch_style4">
			<LineStyle>
				<color>ff0e00fa</color>
				<width>4.0</width>
			</LineStyle>
		</Style>
		<Style id="branch_style4">
			<LineStyle>
				<color>ff0e00fa</color>
				<width>4.0</width>
			</LineStyle>
		</Style>
		<Style id="branch_style4">
			<LineStyle>
				<color>ff0e00fa</color>
				<width>4.0</width>
			</LineStyle>
		</Style>
		<Style id="branch_style4">
			<LineStyle>
				<color>ff0e00fa</color>
				<width>4.0</width>
			</LineStyle>
		</Style>
		<Style id="branch_style4">
			<LineStyle>
				<color>ff0e00fa</color>
				<width>4.0</width>
			</LineStyle>
		</Style>
		<Style id="branch_style4">
			<LineStyle>
				<color>ff0e00fa</color>
				<width>4.0</width>
			</LineStyle>
		</Style>
		<Style id="branch_style4">
			<LineStyle>
				<color>ff0e00fa</color>
				<width>4.0</width>
			</LineStyle>
		</Style>
		<Style id="branch_style4">
			<LineStyle>
				<color>ff0e00fa</color>
				<width>4.0</width>
			</LineStyle>
		</Style>
		<Style id="branch_style4">
			<LineStyle>
				<color>ff0e00fa</color>
				<width>4.0</width>
			</LineStyle>
		</Style>
		<Style id="branch_style4">
			<LineStyle>
				<color>ff0e00fa</color>
				<width>4.0</width>
			</LineStyle>
		</Style>
		<Style id="branch_style4">
			<LineStyle>
				<color>ff0e00fa</color>
				<width>4.0</width>
			</LineStyle>
		</Style>
		<Style id="branch_style4">
			<LineStyle>
				<color>ff0e00fa</color>
				<width>4.0</width>
			</LineStyle>
		</Style>
		<Style id="branch_style4">
			<LineStyle>
				<color>ff0e00fa</color>
				<width>4.0</width>
			</LineStyle>
		</Style>
		<Style id="branch_style4">
			<LineStyle>
				<color>ff0e00fa</color>
				<width>4.0</width>
			</LineStyle>
		</Style>
		<Style id="branch_style4">
			<LineStyle>
				<color>ff0e00fa</color>
				<width>4.0</width>
			</LineStyle>
		</Style>
		<Style id="branch_style4">
			<LineStyle>
				<color>ff0e00fa</color>
				<width>4.0</width>
			</LineStyle>
		</Style>
		<Style id="branch_style4">
			<LineStyle>
				<color>ff0e00fa</color>
				<width>4.0</width>
			</LineStyle>
		</Style>
		<Style id="branch_style4">
			<LineStyle>
				<color>ff0e00fa</color>
				<width>4.0</width>
			</LineStyle>
		</Style>
		<Style id="branch_style4">
			<LineStyle>
				<color>ff0e00fa</color>
				<width>4.0</width>
			</LineStyle>
		</Style>
		<Style id="branch_style4">
			<LineStyle>
				<color>ff0e00fa</color>
				<width>4.0</width>
			</LineStyle>
		</Style>
		<Style id="branch_style4">
			<LineStyle>
				<color>ff0e00fa</color>
				<width>4.0</width>
			</LineStyle>
		</Style>
		<Style id="branch_style4">
			<LineStyle>
				<color>ff0e00fa</color>
				<width>4.0</width>
			</LineStyle>
		</Style>
		<Style id="branch_style4">
			<LineStyle>
				<color>ff0e00fa</color>
				<width>4.0</width>
			</LineStyle>
		</Style>
		<Style id="branch_style4">
			<LineStyle>
				<color>ff0e00fa</color>
				<width>4.0</width>
			</LineStyle>
		</Style>
		<Style id="branch_style4">
			<LineStyle>
				<color>ff0e00fa</color>
				<width>4.0</width>
			</LineStyle>
		</Style>
		<Style id="branch_style4">
			<LineStyle>
				<color>ff0e00fa</color>
				<width>4.0</width>
			</LineStyle>
		</Style>
		<Style id="branch_style4">
			<LineStyle>
				<color>ff0e00fa</color>
				<width>4.0</width>
			</LineStyle>
		</Style>
		<Style id="branch_style4">
			<LineStyle>
				<color>ff0e00fa</color>
				<width>4.0</width>
			</LineStyle>
		</Style>
		<Style id="branch_style4">
			<LineStyle>
				<color>ff0e00fa</color>
				<width>4.0</width>
			</LineStyle>
		</Style>
		<Style id="branch_style4">
			<LineStyle>
				<color>ff0e00fa</color>
				<width>4.0</width>
			</LineStyle>
		</Style>
		<Style id="branch_style4">
			<LineStyle>
				<color>ff0e00fa</color>
				<width>4.0</width>
			</LineStyle>
		</Style>
		<Style id="branch_style4">
			<LineStyle>
				<color>ff0e00fa</color>
				<width>4.0</width>
			</LineStyle>
		</Style>
		<Style id="branch_style4">
			<LineStyle>
				<color>ff0e00fa</color>
				<width>4.0</width>
			</LineStyle>
		</Style>
		<Style id="branch_style4">
			<LineStyle>
				<color>ff0e00fa</color>
				<width>4.0</width>
			</LineStyle>
		</Style>
		<Style id="branch_style4">
			<LineStyle>
				<color>ff0e00fa</color>
				<width>4.0</width>
			</LineStyle>
		</Style>
		<Style id="branch_style4">
			<LineStyle>
				<color>ff0e00fa</color>
				<width>4.0</width>
			</LineStyle>
		</Style>
		<Style id="branch_style4">
			<LineStyle>
				<color>ff0e00fa</color>
				<width>4.0</width>
			</LineStyle>
		</Style>
		<Style id="branch_style4">
			<LineStyle>
				<color>ff0e00fa</color>
				<width>4.0</width>
			</LineStyle>
		</Style>
		<Style id="branch_style4">
			<LineStyle>
				<color>ff0e00fa</color>
				<width>4.0</width>
			</LineStyle>
		</Style>
		<Style id="branch_style4">
			<LineStyle>
				<color>ff0e00fa</color>
				<width>4.0</width>
			</LineStyle>
		</Style>
		<Style id="branch_style4">
			<LineStyle>
				<color>ff0e00fa</color>
				<width>4.0</width>
			</LineStyle>
		</Style>
		<Style id="branch_style4">
			<LineStyle>
				<color>ff0e00fa</color>
				<width>4.0</width>
			</LineStyle>
		</Style>
		<Style id="branch_style4">
			<LineStyle>
				<color>ff0e00fa</color>
				<width>4.0</width>
			</LineStyle>
		</Style>
		<Style id="branch_style4">
			<LineStyle>
				<color>ff0e00fa</color>
				<width>4.0</width>
			</LineStyle>
		</Style>
		<Style id="branch_style4">
			<LineStyle>
				<color>ff0e00fa</color>
				<width>4.0</width>
			</LineStyle>
		</Style>
		<Style id="branch_style4">
			<LineStyle>
				<color>ff0e00fa</color>
				<width>4.0</width>
			</LineStyle>
		</Style>
		<Style id="branch_style4">
			<LineStyle>
				<color>ff0e00fa</color>
				<width>4.0</width>
			</LineStyle>
		</Style>
		<Style id="branch_style4">
			<LineStyle>
				<color>ff0e00fa</color>
				<width>4.0</width>
			</LineStyle>
		</Style>
		<Style id="branch_style4">
			<LineStyle>
				<color>ff0e00fa</color>
				<width>4.0</width>
			</LineStyle>
		</Style>
		<Style id="branch_style4">
			<LineStyle>
				<color>ff0e00fa</color>
				<width>4.0</width>
			</LineStyle>
		</Style>
		<Style id="branch_style4">
			<LineStyle>
				<color>ff0e00fa</color>
				<width>4.0</width>
			</LineStyle>
		</Style>
		<Style id="branch_style4">
			<LineStyle>
				<color>ff0e00fa</color>
				<width>4.0</width>
			</LineStyle>
		</Style>
		<Style id="branch_style4">
			<LineStyle>
				<color>ff0e00fa</color>
				<width>4.0</width>
			</LineStyle>
		</Style>
		<Style id="branch_style4">
			<LineStyle>
				<color>ff0e00fa</color>
				<width>4.0</width>
			</LineStyle>
		</Style>
		<Style id="branch_style4">
			<LineStyle>
				<color>ff0e00fa</color>
				<width>4.0</width>
			</LineStyle>
		</Style>
		<Style id="branch_style4">
			<LineStyle>
				<color>ff0e00fa</color>
				<width>4.0</width>
			</LineStyle>
		</Style>
		<Style id="branch_style4">
			<LineStyle>
				<color>ff0e00fa</color>
				<width>4.0</width>
			</LineStyle>
		</Style>
		<Style id="branch_style4">
			<LineStyle>
				<color>ff0e00fa</color>
				<width>4.0</width>
			</LineStyle>
		</Style>
		<Style id="branch_style4">
			<LineStyle>
				<color>ff0e00fa</color>
				<width>4.0</width>
			</LineStyle>
		</Style>
		<Style id="branch_style4">
			<LineStyle>
				<color>ff0e00fa</color>
				<width>4.0</width>
			</LineStyle>
		</Style>
		<Style id="branch_style4">
			<LineStyle>
				<color>ff0e00fa</color>
				<width>4.0</width>
			</LineStyle>
		</Style>
		<Style id="branch_style4">
			<LineStyle>
				<color>ff0e00fa</color>
				<width>4.0</width>
			</LineStyle>
		</Style>
		<Style id="branch_style4">
			<LineStyle>
				<color>ff0e00fa</color>
				<width>4.0</width>
			</LineStyle>
		</Style>
		<Style id="branch_style4">
			<LineStyle>
				<color>ff0e00fa</color>
				<width>4.0</width>
			</LineStyle>
		</Style>
		<Style id="branch_style4">
			<LineStyle>
				<color>ff0e00fa</color>
				<width>4.0</width>
			</LineStyle>
		</Style>
		<Style id="branch_style4">
			<LineStyle>
				<color>ff0e00fa</color>
				<width>4.0</width>
			</LineStyle>
		</Style>
		<Style id="branch_style4">
			<LineStyle>
				<color>ff0e00fa</color>
				<width>4.0</width>
			</LineStyle>
		</Style>
		<Style id="branch_style4">
			<LineStyle>
				<color>ff0e00fa</color>
				<width>4.0</width>
			</LineStyle>
		</Style>
		<Style id="branch_style4">
			<LineStyle>
				<color>ff0e00fa</color>
				<width>4.0</width>
			</LineStyle>
		</Style>
		<Style id="branch_style4">
			<LineStyle>
				<color>ff0e00fa</color>
				<width>4.0</width>
			</LineStyle>
		</Style>
		<Style id="branch_style4">
			<LineStyle>
				<color>ff0e00fa</color>
				<width>4.0</width>
			</LineStyle>
		</Style>
		<Style id="branch_style4">
			<LineStyle>
				<color>ff0e00fa</color>
				<width>4.0</width>
			</LineStyle>
		</Style>
		<Style id="branch_style4">
			<LineStyle>
				<color>ff0e00fa</color>
				<width>4.0</width>
			</LineStyle>
		</Style>
		<Style id="branch_style4">
			<LineStyle>
				<color>ff0e00fa</color>
				<width>4.0</width>
			</LineStyle>
		</Style>
		<Style id="branch_style4">
			<LineStyle>
				<color>ff0e00fa</color>
				<width>4.0</width>
			</LineStyle>
		</Style>
		<Style id="branch_style4">
			<LineStyle>
				<color>ff0e00fa</color>
				<width>4.0</width>
			</LineStyle>
		</Style>
		<Style id="branch_style5">
			<LineStyle>
				<color>ff0e00fa</color>
				<width>4.0</width>
			</LineStyle>
		</Style>
		<Style id="branch_style5">
			<LineStyle>
				<color>ff0e00fa</color>
				<width>4.0</width>
			</LineStyle>
		</Style>
		<Style id="branch_style5">
			<LineStyle>
				<color>ff0e00fa</color>
				<width>4.0</width>
			</LineStyle>
		</Style>
		<Style id="branch_style5">
			<LineStyle>
				<color>ff0e00fa</color>
				<width>4.0</width>
			</LineStyle>
		</Style>
		<Style id="branch_style5">
			<LineStyle>
				<color>ff0e00fa</color>
				<width>4.0</width>
			</LineStyle>
		</Style>
		<Style id="branch_style5">
			<LineStyle>
				<color>ff0e00fa</color>
				<width>4.0</width>
			</LineStyle>
		</Style>
		<Style id="branch_style5">
			<LineStyle>
				<color>ff0e00fa</color>
				<width>4.0</width>
			</LineStyle>
		</Style>
		<Style id="branch_style5">
			<LineStyle>
				<color>ff0e00fa</color>
				<width>4.0</width>
			</LineStyle>
		</Style>
		<Style id="branch_style5">
			<LineStyle>
				<color>ff0e00fa</color>
				<width>4.0</width>
			</LineStyle>
		</Style>
		<Style id="branch_style5">
			<LineStyle>
				<color>ff0e00fa</color>
				<width>4.0</width>
			</LineStyle>
		</Style>
		<Style id="branch_style5">
			<LineStyle>
				<color>ff0e00fa</color>
				<width>4.0</width>
			</LineStyle>
		</Style>
		<Style id="branch_style5">
			<LineStyle>
				<color>ff0e00fa</color>
				<width>4.0</width>
			</LineStyle>
		</Style>
		<Style id="branch_style5">
			<LineStyle>
				<color>ff0e00fa</color>
				<width>4.0</width>
			</LineStyle>
		</Style>
		<Style id="branch_style5">
			<LineStyle>
				<color>ff0e00fa</color>
				<width>4.0</width>
			</LineStyle>
		</Style>
		<Style id="branch_style5">
			<LineStyle>
				<color>ff0e00fa</color>
				<width>4.0</width>
			</LineStyle>
		</Style>
		<Style id="branch_style5">
			<LineStyle>
				<color>ff0e00fa</color>
				<width>4.0</width>
			</LineStyle>
		</Style>
		<Style id="branch_style5">
			<LineStyle>
				<color>ff0e00fa</color>
				<width>4.0</width>
			</LineStyle>
		</Style>
		<Style id="branch_style5">
			<LineStyle>
				<color>ff0e00fa</color>
				<width>4.0</width>
			</LineStyle>
		</Style>
		<Style id="branch_style5">
			<LineStyle>
				<color>ff0e00fa</color>
				<width>4.0</width>
			</LineStyle>
		</Style>
		<Style id="branch_style5">
			<LineStyle>
				<color>ff0e00fa</color>
				<width>4.0</width>
			</LineStyle>
		</Style>
		<Style id="branch_style5">
			<LineStyle>
				<color>ff0e00fa</color>
				<width>4.0</width>
			</LineStyle>
		</Style>
		<Style id="branch_style5">
			<LineStyle>
				<color>ff0e00fa</color>
				<width>4.0</width>
			</LineStyle>
		</Style>
		<Style id="branch_style5">
			<LineStyle>
				<color>ff0e00fa</color>
				<width>4.0</width>
			</LineStyle>
		</Style>
		<Style id="branch_style5">
			<LineStyle>
				<color>ff0e00fa</color>
				<width>4.0</width>
			</LineStyle>
		</Style>
		<Style id="branch_style5">
			<LineStyle>
				<color>ff0e00fa</color>
				<width>4.0</width>
			</LineStyle>
		</Style>
		<Style id="branch_style5">
			<LineStyle>
				<color>ff0e00fa</color>
				<width>4.0</width>
			</LineStyle>
		</Style>
		<Style id="branch_style5">
			<LineStyle>
				<color>ff0e00fa</color>
				<width>4.0</width>
			</LineStyle>
		</Style>
		<Style id="branch_style5">
			<LineStyle>
				<color>ff0e00fa</color>
				<width>4.0</width>
			</LineStyle>
		</Style>
		<Style id="branch_style5">
			<LineStyle>
				<color>ff0e00fa</color>
				<width>4.0</width>
			</LineStyle>
		</Style>
		<Style id="branch_style5">
			<LineStyle>
				<color>ff0e00fa</color>
				<width>4.0</width>
			</LineStyle>
		</Style>
		<Style id="branch_style5">
			<LineStyle>
				<color>ff0e00fa</color>
				<width>4.0</width>
			</LineStyle>
		</Style>
		<Style id="branch_style5">
			<LineStyle>
				<color>ff0e00fa</color>
				<width>4.0</width>
			</LineStyle>
		</Style>
		<Style id="branch_style5">
			<LineStyle>
				<color>ff0e00fa</color>
				<width>4.0</width>
			</LineStyle>
		</Style>
		<Style id="branch_style5">
			<LineStyle>
				<color>ff0e00fa</color>
				<width>4.0</width>
			</LineStyle>
		</Style>
		<Style id="branch_style5">
			<LineStyle>
				<color>ff0e00fa</color>
				<width>4.0</width>
			</LineStyle>
		</Style>
		<Style id="branch_style5">
			<LineStyle>
				<color>ff0e00fa</color>
				<width>4.0</width>
			</LineStyle>
		</Style>
		<Style id="branch_style5">
			<LineStyle>
				<color>ff0e00fa</color>
				<width>4.0</width>
			</LineStyle>
		</Style>
		<Style id="branch_style5">
			<LineStyle>
				<color>ff0e00fa</color>
				<width>4.0</width>
			</LineStyle>
		</Style>
		<Style id="branch_style5">
			<LineStyle>
				<color>ff0e00fa</color>
				<width>4.0</width>
			</LineStyle>
		</Style>
		<Style id="branch_style5">
			<LineStyle>
				<color>ff0e00fa</color>
				<width>4.0</width>
			</LineStyle>
		</Style>
		<Style id="branch_style5">
			<LineStyle>
				<color>ff0e00fa</color>
				<width>4.0</width>
			</LineStyle>
		</Style>
		<Style id="branch_style5">
			<LineStyle>
				<color>ff0e00fa</color>
				<width>4.0</width>
			</LineStyle>
		</Style>
		<Style id="branch_style5">
			<LineStyle>
				<color>ff0e00fa</color>
				<width>4.0</width>
			</LineStyle>
		</Style>
		<Style id="branch_style5">
			<LineStyle>
				<color>ff0e00fa</color>
				<width>4.0</width>
			</LineStyle>
		</Style>
		<Style id="branch_style5">
			<LineStyle>
				<color>ff0e00fa</color>
				<width>4.0</width>
			</LineStyle>
		</Style>
		<Style id="branch_style5">
			<LineStyle>
				<color>ff0e00fa</color>
				<width>4.0</width>
			</LineStyle>
		</Style>
		<Style id="branch_style5">
			<LineStyle>
				<color>ff0e00fa</color>
				<width>4.0</width>
			</LineStyle>
		</Style>
		<Style id="branch_style5">
			<LineStyle>
				<color>ff0e00fa</color>
				<width>4.0</width>
			</LineStyle>
		</Style>
		<Style id="branch_style5">
			<LineStyle>
				<color>ff0e00fa</color>
				<width>4.0</width>
			</LineStyle>
		</Style>
		<Style id="branch_style5">
			<LineStyle>
				<color>ff0e00fa</color>
				<width>4.0</width>
			</LineStyle>
		</Style>
		<Style id="branch_style5">
			<LineStyle>
				<color>ff0e00fa</color>
				<width>4.0</width>
			</LineStyle>
		</Style>
		<Style id="branch_style5">
			<LineStyle>
				<color>ff0e00fa</color>
				<width>4.0</width>
			</LineStyle>
		</Style>
		<Style id="branch_style5">
			<LineStyle>
				<color>ff0e00fa</color>
				<width>4.0</width>
			</LineStyle>
		</Style>
		<Style id="branch_style5">
			<LineStyle>
				<color>ff0e00fa</color>
				<width>4.0</width>
			</LineStyle>
		</Style>
		<Style id="branch_style5">
			<LineStyle>
				<color>ff0e00fa</color>
				<width>4.0</width>
			</LineStyle>
		</Style>
		<Style id="branch_style5">
			<LineStyle>
				<color>ff0e00fa</color>
				<width>4.0</width>
			</LineStyle>
		</Style>
		<Style id="branch_style5">
			<LineStyle>
				<color>ff0e00fa</color>
				<width>4.0</width>
			</LineStyle>
		</Style>
		<Style id="branch_style5">
			<LineStyle>
				<color>ff0e00fa</color>
				<width>4.0</width>
			</LineStyle>
		</Style>
		<Style id="branch_style5">
			<LineStyle>
				<color>ff0e00fa</color>
				<width>4.0</width>
			</LineStyle>
		</Style>
		<Style id="branch_style5">
			<LineStyle>
				<color>ff0e00fa</color>
				<width>4.0</width>
			</LineStyle>
		</Style>
		<Style id="branch_style5">
			<LineStyle>
				<color>ff0e00fa</color>
				<width>4.0</width>
			</LineStyle>
		</Style>
		<Style id="branch_style5">
			<LineStyle>
				<color>ff0e00fa</color>
				<width>4.0</width>
			</LineStyle>
		</Style>
		<Style id="branch_style5">
			<LineStyle>
				<color>ff0e00fa</color>
				<width>4.0</width>
			</LineStyle>
		</Style>
		<Style id="branch_style5">
			<LineStyle>
				<color>ff0e00fa</color>
				<width>4.0</width>
			</LineStyle>
		</Style>
		<Style id="branch_style5">
			<LineStyle>
				<color>ff0e00fa</color>
				<width>4.0</width>
			</LineStyle>
		</Style>
		<Style id="branch_style5">
			<LineStyle>
				<color>ff0e00fa</color>
				<width>4.0</width>
			</LineStyle>
		</Style>
		<Style id="branch_style5">
			<LineStyle>
				<color>ff0e00fa</color>
				<width>4.0</width>
			</LineStyle>
		</Style>
		<Style id="branch_style5">
			<LineStyle>
				<color>ff0e00fa</color>
				<width>4.0</width>
			</LineStyle>
		</Style>
		<Style id="branch_style5">
			<LineStyle>
				<color>ff0e00fa</color>
				<width>4.0</width>
			</LineStyle>
		</Style>
		<Style id="branch_style5">
			<LineStyle>
				<color>ff0e00fa</color>
				<width>4.0</width>
			</LineStyle>
		</Style>
		<Style id="branch_style5">
			<LineStyle>
				<color>ff0e00fa</color>
				<width>4.0</width>
			</LineStyle>
		</Style>
		<Style id="branch_style5">
			<LineStyle>
				<color>ff0e00fa</color>
				<width>4.0</width>
			</LineStyle>
		</Style>
		<Style id="branch_style5">
			<LineStyle>
				<color>ff0e00fa</color>
				<width>4.0</width>
			</LineStyle>
		</Style>
		<Style id="branch_style5">
			<LineStyle>
				<color>ff0e00fa</color>
				<width>4.0</width>
			</LineStyle>
		</Style>
		<Style id="branch_style5">
			<LineStyle>
				<color>ff0e00fa</color>
				<width>4.0</width>
			</LineStyle>
		</Style>
		<Style id="branch_style5">
			<LineStyle>
				<color>ff0e00fa</color>
				<width>4.0</width>
			</LineStyle>
		</Style>
		<Style id="branch_style5">
			<LineStyle>
				<color>ff0e00fa</color>
				<width>4.0</width>
			</LineStyle>
		</Style>
		<Style id="branch_style5">
			<LineStyle>
				<color>ff0e00fa</color>
				<width>4.0</width>
			</LineStyle>
		</Style>
		<Style id="branch_style5">
			<LineStyle>
				<color>ff0e00fa</color>
				<width>4.0</width>
			</LineStyle>
		</Style>
		<Style id="branch_style5">
			<LineStyle>
				<color>ff0e00fa</color>
				<width>4.0</width>
			</LineStyle>
		</Style>
		<Style id="branch_style5">
			<LineStyle>
				<color>ff0e00fa</color>
				<width>4.0</width>
			</LineStyle>
		</Style>
		<Style id="branch_style5">
			<LineStyle>
				<color>ff0e00fa</color>
				<width>4.0</width>
			</LineStyle>
		</Style>
		<Style id="branch_style5">
			<LineStyle>
				<color>ff0e00fa</color>
				<width>4.0</width>
			</LineStyle>
		</Style>
		<Style id="branch_style5">
			<LineStyle>
				<color>ff0e00fa</color>
				<width>4.0</width>
			</LineStyle>
		</Style>
		<Style id="branch_style5">
			<LineStyle>
				<color>ff0e00fa</color>
				<width>4.0</width>
			</LineStyle>
		</Style>
		<Style id="branch_style5">
			<LineStyle>
				<color>ff0e00fa</color>
				<width>4.0</width>
			</LineStyle>
		</Style>
		<Style id="branch_style5">
			<LineStyle>
				<color>ff0e00fa</color>
				<width>4.0</width>
			</LineStyle>
		</Style>
		<Style id="branch_style5">
			<LineStyle>
				<color>ff0e00fa</color>
				<width>4.0</width>
			</LineStyle>
		</Style>
		<Style id="branch_style5">
			<LineStyle>
				<color>ff0e00fa</color>
				<width>4.0</width>
			</LineStyle>
		</Style>
		<Style id="branch_style5">
			<LineStyle>
				<color>ff0e00fa</color>
				<width>4.0</width>
			</LineStyle>
		</Style>
		<Style id="branch_style5">
			<LineStyle>
				<color>ff0e00fa</color>
				<width>4.0</width>
			</LineStyle>
		</Style>
		<Style id="branch_style5">
			<LineStyle>
				<color>ff0e00fa</color>
				<width>4.0</width>
			</LineStyle>
		</Style>
		<Style id="branch_style5">
			<LineStyle>
				<color>ff0e00fa</color>
				<width>4.0</width>
			</LineStyle>
		</Style>
		<Style id="branch_style5">
			<LineStyle>
				<color>ff0e00fa</color>
				<width>4.0</width>
			</LineStyle>
		</Style>
		<Style id="branch_style5">
			<LineStyle>
				<color>ff0e00fa</color>
				<width>4.0</width>
			</LineStyle>
		</Style>
		<Style id="branch_style5">
			<LineStyle>
				<color>ff0e00fa</color>
				<width>4.0</width>
			</LineStyle>
		</Style>
		<Style id="branch_style5">
			<LineStyle>
				<color>ff0e00fa</color>
				<width>4.0</width>
			</LineStyle>
		</Style>
		<Style id="branch_style5">
			<LineStyle>
				<color>ff0e00fa</color>
				<width>4.0</width>
			</LineStyle>
		</Style>
		<Style id="branch_style5">
			<LineStyle>
				<color>ff0e00fa</color>
				<width>4.0</width>
			</LineStyle>
		</Style>
		<Style id="branch_style5">
			<LineStyle>
				<color>ff0e00fa</color>
				<width>4.0</width>
			</LineStyle>
		</Style>
		<Style id="branch_style6">
			<LineStyle>
				<color>ff0e00fa</color>
				<width>4.0</width>
			</LineStyle>
		</Style>
		<Style id="branch_style6">
			<LineStyle>
				<color>ff0e00fa</color>
				<width>4.0</width>
			</LineStyle>
		</Style>
		<Style id="branch_style6">
			<LineStyle>
				<color>ff0e00fa</color>
				<width>4.0</width>
			</LineStyle>
		</Style>
		<Style id="branch_style6">
			<LineStyle>
				<color>ff0e00fa</color>
				<width>4.0</width>
			</LineStyle>
		</Style>
		<Style id="branch_style6">
			<LineStyle>
				<color>ff0e00fa</color>
				<width>4.0</width>
			</LineStyle>
		</Style>
		<Style id="branch_style6">
			<LineStyle>
				<color>ff0e00fa</color>
				<width>4.0</width>
			</LineStyle>
		</Style>
		<Style id="branch_style6">
			<LineStyle>
				<color>ff0e00fa</color>
				<width>4.0</width>
			</LineStyle>
		</Style>
		<Style id="branch_style6">
			<LineStyle>
				<color>ff0e00fa</color>
				<width>4.0</width>
			</LineStyle>
		</Style>
		<Style id="branch_style6">
			<LineStyle>
				<color>ff0e00fa</color>
				<width>4.0</width>
			</LineStyle>
		</Style>
		<Style id="branch_style6">
			<LineStyle>
				<color>ff0e00fa</color>
				<width>4.0</width>
			</LineStyle>
		</Style>
		<Style id="branch_style6">
			<LineStyle>
				<color>ff0e00fa</color>
				<width>4.0</width>
			</LineStyle>
		</Style>
		<Style id="branch_style6">
			<LineStyle>
				<color>ff0e00fa</color>
				<width>4.0</width>
			</LineStyle>
		</Style>
		<Style id="branch_style6">
			<LineStyle>
				<color>ff0e00fa</color>
				<width>4.0</width>
			</LineStyle>
		</Style>
		<Style id="branch_style6">
			<LineStyle>
				<color>ff0e00fa</color>
				<width>4.0</width>
			</LineStyle>
		</Style>
		<Style id="branch_style6">
			<LineStyle>
				<color>ff0e00fa</color>
				<width>4.0</width>
			</LineStyle>
		</Style>
		<Style id="branch_style6">
			<LineStyle>
				<color>ff0e00fa</color>
				<width>4.0</width>
			</LineStyle>
		</Style>
		<Style id="branch_style6">
			<LineStyle>
				<color>ff0e00fa</color>
				<width>4.0</width>
			</LineStyle>
		</Style>
		<Style id="branch_style6">
			<LineStyle>
				<color>ff0e00fa</color>
				<width>4.0</width>
			</LineStyle>
		</Style>
		<Style id="branch_style6">
			<LineStyle>
				<color>ff0e00fa</color>
				<width>4.0</width>
			</LineStyle>
		</Style>
		<Style id="branch_style6">
			<LineStyle>
				<color>ff0e00fa</color>
				<width>4.0</width>
			</LineStyle>
		</Style>
		<Style id="branch_style6">
			<LineStyle>
				<color>ff0e00fa</color>
				<width>4.0</width>
			</LineStyle>
		</Style>
		<Style id="branch_style6">
			<LineStyle>
				<color>ff0e00fa</color>
				<width>4.0</width>
			</LineStyle>
		</Style>
		<Style id="branch_style6">
			<LineStyle>
				<color>ff0e00fa</color>
				<width>4.0</width>
			</LineStyle>
		</Style>
		<Style id="branch_style6">
			<LineStyle>
				<color>ff0e00fa</color>
				<width>4.0</width>
			</LineStyle>
		</Style>
		<Style id="branch_style6">
			<LineStyle>
				<color>ff0e00fa</color>
				<width>4.0</width>
			</LineStyle>
		</Style>
		<Style id="branch_style6">
			<LineStyle>
				<color>ff0e00fa</color>
				<width>4.0</width>
			</LineStyle>
		</Style>
		<Style id="branch_style6">
			<LineStyle>
				<color>ff0e00fa</color>
				<width>4.0</width>
			</LineStyle>
		</Style>
		<Style id="branch_style6">
			<LineStyle>
				<color>ff0e00fa</color>
				<width>4.0</width>
			</LineStyle>
		</Style>
		<Style id="branch_style6">
			<LineStyle>
				<color>ff0e00fa</color>
				<width>4.0</width>
			</LineStyle>
		</Style>
		<Style id="branch_style6">
			<LineStyle>
				<color>ff0e00fa</color>
				<width>4.0</width>
			</LineStyle>
		</Style>
		<Style id="branch_style6">
			<LineStyle>
				<color>ff0e00fa</color>
				<width>4.0</width>
			</LineStyle>
		</Style>
		<Style id="branch_style6">
			<LineStyle>
				<color>ff0e00fa</color>
				<width>4.0</width>
			</LineStyle>
		</Style>
		<Style id="branch_style6">
			<LineStyle>
				<color>ff0e00fa</color>
				<width>4.0</width>
			</LineStyle>
		</Style>
		<Style id="branch_style6">
			<LineStyle>
				<color>ff0e00fa</color>
				<width>4.0</width>
			</LineStyle>
		</Style>
		<Style id="branch_style6">
			<LineStyle>
				<color>ff0e00fa</color>
				<width>4.0</width>
			</LineStyle>
		</Style>
		<Style id="branch_style6">
			<LineStyle>
				<color>ff0e00fa</color>
				<width>4.0</width>
			</LineStyle>
		</Style>
		<Style id="branch_style6">
			<LineStyle>
				<color>ff0e00fa</color>
				<width>4.0</width>
			</LineStyle>
		</Style>
		<Style id="branch_style6">
			<LineStyle>
				<color>ff0e00fa</color>
				<width>4.0</width>
			</LineStyle>
		</Style>
		<Style id="branch_style6">
			<LineStyle>
				<color>ff0e00fa</color>
				<width>4.0</width>
			</LineStyle>
		</Style>
		<Style id="branch_style6">
			<LineStyle>
				<color>ff0e00fa</color>
				<width>4.0</width>
			</LineStyle>
		</Style>
		<Style id="branch_style6">
			<LineStyle>
				<color>ff0e00fa</color>
				<width>4.0</width>
			</LineStyle>
		</Style>
		<Style id="branch_style6">
			<LineStyle>
				<color>ff0e00fa</color>
				<width>4.0</width>
			</LineStyle>
		</Style>
		<Style id="branch_style6">
			<LineStyle>
				<color>ff0e00fa</color>
				<width>4.0</width>
			</LineStyle>
		</Style>
		<Style id="branch_style6">
			<LineStyle>
				<color>ff0e00fa</color>
				<width>4.0</width>
			</LineStyle>
		</Style>
		<Style id="branch_style6">
			<LineStyle>
				<color>ff0e00fa</color>
				<width>4.0</width>
			</LineStyle>
		</Style>
		<Style id="branch_style6">
			<LineStyle>
				<color>ff0e00fa</color>
				<width>4.0</width>
			</LineStyle>
		</Style>
		<Style id="branch_style6">
			<LineStyle>
				<color>ff0e00fa</color>
				<width>4.0</width>
			</LineStyle>
		</Style>
		<Style id="branch_style6">
			<LineStyle>
				<color>ff0e00fa</color>
				<width>4.0</width>
			</LineStyle>
		</Style>
		<Style id="branch_style6">
			<LineStyle>
				<color>ff0e00fa</color>
				<width>4.0</width>
			</LineStyle>
		</Style>
		<Style id="branch_style6">
			<LineStyle>
				<color>ff0e00fa</color>
				<width>4.0</width>
			</LineStyle>
		</Style>
		<Style id="branch_style6">
			<LineStyle>
				<color>ff0e00fa</color>
				<width>4.0</width>
			</LineStyle>
		</Style>
		<Style id="branch_style6">
			<LineStyle>
				<color>ff0e00fa</color>
				<width>4.0</width>
			</LineStyle>
		</Style>
		<Style id="branch_style6">
			<LineStyle>
				<color>ff0e00fa</color>
				<width>4.0</width>
			</LineStyle>
		</Style>
		<Style id="branch_style6">
			<LineStyle>
				<color>ff0e00fa</color>
				<width>4.0</width>
			</LineStyle>
		</Style>
		<Style id="branch_style6">
			<LineStyle>
				<color>ff0e00fa</color>
				<width>4.0</width>
			</LineStyle>
		</Style>
		<Style id="branch_style6">
			<LineStyle>
				<color>ff0e00fa</color>
				<width>4.0</width>
			</LineStyle>
		</Style>
		<Style id="branch_style6">
			<LineStyle>
				<color>ff0e00fa</color>
				<width>4.0</width>
			</LineStyle>
		</Style>
		<Style id="branch_style6">
			<LineStyle>
				<color>ff0e00fa</color>
				<width>4.0</width>
			</LineStyle>
		</Style>
		<Style id="branch_style6">
			<LineStyle>
				<color>ff0e00fa</color>
				<width>4.0</width>
			</LineStyle>
		</Style>
		<Style id="branch_style6">
			<LineStyle>
				<color>ff0e00fa</color>
				<width>4.0</width>
			</LineStyle>
		</Style>
		<Style id="branch_style6">
			<LineStyle>
				<color>ff0e00fa</color>
				<width>4.0</width>
			</LineStyle>
		</Style>
		<Style id="branch_style6">
			<LineStyle>
				<color>ff0e00fa</color>
				<width>4.0</width>
			</LineStyle>
		</Style>
		<Style id="branch_style6">
			<LineStyle>
				<color>ff0e00fa</color>
				<width>4.0</width>
			</LineStyle>
		</Style>
		<Style id="branch_style6">
			<LineStyle>
				<color>ff0e00fa</color>
				<width>4.0</width>
			</LineStyle>
		</Style>
		<Style id="branch_style6">
			<LineStyle>
				<color>ff0e00fa</color>
				<width>4.0</width>
			</LineStyle>
		</Style>
		<Style id="branch_style6">
			<LineStyle>
				<color>ff0e00fa</color>
				<width>4.0</width>
			</LineStyle>
		</Style>
		<Style id="branch_style6">
			<LineStyle>
				<color>ff0e00fa</color>
				<width>4.0</width>
			</LineStyle>
		</Style>
		<Style id="branch_style6">
			<LineStyle>
				<color>ff0e00fa</color>
				<width>4.0</width>
			</LineStyle>
		</Style>
		<Style id="branch_style6">
			<LineStyle>
				<color>ff0e00fa</color>
				<width>4.0</width>
			</LineStyle>
		</Style>
		<Style id="branch_style6">
			<LineStyle>
				<color>ff0e00fa</color>
				<width>4.0</width>
			</LineStyle>
		</Style>
		<Style id="branch_style6">
			<LineStyle>
				<color>ff0e00fa</color>
				<width>4.0</width>
			</LineStyle>
		</Style>
		<Style id="branch_style6">
			<LineStyle>
				<color>ff0e00fa</color>
				<width>4.0</width>
			</LineStyle>
		</Style>
		<Style id="branch_style6">
			<LineStyle>
				<color>ff0e00fa</color>
				<width>4.0</width>
			</LineStyle>
		</Style>
		<Style id="branch_style6">
			<LineStyle>
				<color>ff0e00fa</color>
				<width>4.0</width>
			</LineStyle>
		</Style>
		<Style id="branch_style6">
			<LineStyle>
				<color>ff0e00fa</color>
				<width>4.0</width>
			</LineStyle>
		</Style>
		<Style id="branch_style6">
			<LineStyle>
				<color>ff0e00fa</color>
				<width>4.0</width>
			</LineStyle>
		</Style>
		<Style id="branch_style6">
			<LineStyle>
				<color>ff0e00fa</color>
				<width>4.0</width>
			</LineStyle>
		</Style>
		<Style id="branch_style6">
			<LineStyle>
				<color>ff0e00fa</color>
				<width>4.0</width>
			</LineStyle>
		</Style>
		<Style id="branch_style6">
			<LineStyle>
				<color>ff0e00fa</color>
				<width>4.0</width>
			</LineStyle>
		</Style>
		<Style id="branch_style6">
			<LineStyle>
				<color>ff0e00fa</color>
				<width>4.0</width>
			</LineStyle>
		</Style>
		<Style id="branch_style6">
			<LineStyle>
				<color>ff0e00fa</color>
				<width>4.0</width>
			</LineStyle>
		</Style>
		<Style id="branch_style6">
			<LineStyle>
				<color>ff0e00fa</color>
				<width>4.0</width>
			</LineStyle>
		</Style>
		<Style id="branch_style6">
			<LineStyle>
				<color>ff0e00fa</color>
				<width>4.0</width>
			</LineStyle>
		</Style>
		<Style id="branch_style6">
			<LineStyle>
				<color>ff0e00fa</color>
				<width>4.0</width>
			</LineStyle>
		</Style>
		<Style id="branch_style6">
			<LineStyle>
				<color>ff0e00fa</color>
				<width>4.0</width>
			</LineStyle>
		</Style>
		<Style id="branch_style6">
			<LineStyle>
				<color>ff0e00fa</color>
				<width>4.0</width>
			</LineStyle>
		</Style>
		<Style id="branch_style6">
			<LineStyle>
				<color>ff0e00fa</color>
				<width>4.0</width>
			</LineStyle>
		</Style>
		<Style id="branch_style6">
			<LineStyle>
				<color>ff0e00fa</color>
				<width>4.0</width>
			</LineStyle>
		</Style>
		<Style id="branch_style6">
			<LineStyle>
				<color>ff0e00fa</color>
				<width>4.0</width>
			</LineStyle>
		</Style>
		<Style id="branch_style6">
			<LineStyle>
				<color>ff0e00fa</color>
				<width>4.0</width>
			</LineStyle>
		</Style>
		<Style id="branch_style6">
			<LineStyle>
				<color>ff0e00fa</color>
				<width>4.0</width>
			</LineStyle>
		</Style>
		<Style id="branch_style6">
			<LineStyle>
				<color>ff0e00fa</color>
				<width>4.0</width>
			</LineStyle>
		</Style>
		<Style id="branch_style6">
			<LineStyle>
				<color>ff0e00fa</color>
				<width>4.0</width>
			</LineStyle>
		</Style>
		<Style id="branch_style6">
			<LineStyle>
				<color>ff0e00fa</color>
				<width>4.0</width>
			</LineStyle>
		</Style>
		<Style id="branch_style6">
			<LineStyle>
				<color>ff0e00fa</color>
				<width>4.0</width>
			</LineStyle>
		</Style>
		<Style id="branch_style6">
			<LineStyle>
				<color>ff0e00fa</color>
				<width>4.0</width>
			</LineStyle>
		</Style>
		<Style id="branch_style6">
			<LineStyle>
				<color>ff0e00fa</color>
				<width>4.0</width>
			</LineStyle>
		</Style>
		<Style id="branch_style6">
			<LineStyle>
				<color>ff0e00fa</color>
				<width>4.0</width>
			</LineStyle>
		</Style>
		<Style id="branch_style6">
			<LineStyle>
				<color>ff0e00fa</color>
				<width>4.0</width>
			</LineStyle>
		</Style>
		<Style id="branch_style6">
			<LineStyle>
				<color>ff0e00fa</color>
				<width>4.0</width>
			</LineStyle>
		</Style>
		<Style id="branch_style7">
			<LineStyle>
				<color>ff1200fa</color>
				<width>4.0</width>
			</LineStyle>
		</Style>
		<Style id="branch_style7">
			<LineStyle>
				<color>ff1200fa</color>
				<width>4.0</width>
			</LineStyle>
		</Style>
		<Style id="branch_style7">
			<LineStyle>
				<color>ff1200fa</color>
				<width>4.0</width>
			</LineStyle>
		</Style>
		<Style id="branch_style7">
			<LineStyle>
				<color>ff1200fa</color>
				<width>4.0</width>
			</LineStyle>
		</Style>
		<Style id="branch_style7">
			<LineStyle>
				<color>ff1200fa</color>
				<width>4.0</width>
			</LineStyle>
		</Style>
		<Style id="branch_style7">
			<LineStyle>
				<color>ff1200fa</color>
				<width>4.0</width>
			</LineStyle>
		</Style>
		<Style id="branch_style7">
			<LineStyle>
				<color>ff1200fa</color>
				<width>4.0</width>
			</LineStyle>
		</Style>
		<Style id="branch_style7">
			<LineStyle>
				<color>ff1200fa</color>
				<width>4.0</width>
			</LineStyle>
		</Style>
		<Style id="branch_style7">
			<LineStyle>
				<color>ff1200fa</color>
				<width>4.0</width>
			</LineStyle>
		</Style>
		<Style id="branch_style7">
			<LineStyle>
				<color>ff1200fa</color>
				<width>4.0</width>
			</LineStyle>
		</Style>
		<Style id="branch_style7">
			<LineStyle>
				<color>ff1200fa</color>
				<width>4.0</width>
			</LineStyle>
		</Style>
		<Style id="branch_style7">
			<LineStyle>
				<color>ff1200fa</color>
				<width>4.0</width>
			</LineStyle>
		</Style>
		<Style id="branch_style7">
			<LineStyle>
				<color>ff1200fa</color>
				<width>4.0</width>
			</LineStyle>
		</Style>
		<Style id="branch_style7">
			<LineStyle>
				<color>ff1200fa</color>
				<width>4.0</width>
			</LineStyle>
		</Style>
		<Style id="branch_style7">
			<LineStyle>
				<color>ff1200fa</color>
				<width>4.0</width>
			</LineStyle>
		</Style>
		<Style id="branch_style7">
			<LineStyle>
				<color>ff1200fa</color>
				<width>4.0</width>
			</LineStyle>
		</Style>
		<Style id="branch_style7">
			<LineStyle>
				<color>ff1200fa</color>
				<width>4.0</width>
			</LineStyle>
		</Style>
		<Style id="branch_style7">
			<LineStyle>
				<color>ff1200fa</color>
				<width>4.0</width>
			</LineStyle>
		</Style>
		<Style id="branch_style7">
			<LineStyle>
				<color>ff1200fa</color>
				<width>4.0</width>
			</LineStyle>
		</Style>
		<Style id="branch_style7">
			<LineStyle>
				<color>ff1200fa</color>
				<width>4.0</width>
			</LineStyle>
		</Style>
		<Style id="branch_style7">
			<LineStyle>
				<color>ff1200fa</color>
				<width>4.0</width>
			</LineStyle>
		</Style>
		<Style id="branch_style7">
			<LineStyle>
				<color>ff1200fa</color>
				<width>4.0</width>
			</LineStyle>
		</Style>
		<Style id="branch_style7">
			<LineStyle>
				<color>ff1200fa</color>
				<width>4.0</width>
			</LineStyle>
		</Style>
		<Style id="branch_style7">
			<LineStyle>
				<color>ff1200fa</color>
				<width>4.0</width>
			</LineStyle>
		</Style>
		<Style id="branch_style7">
			<LineStyle>
				<color>ff1200fa</color>
				<width>4.0</width>
			</LineStyle>
		</Style>
		<Style id="branch_style7">
			<LineStyle>
				<color>ff1200fa</color>
				<width>4.0</width>
			</LineStyle>
		</Style>
		<Style id="branch_style7">
			<LineStyle>
				<color>ff1200fa</color>
				<width>4.0</width>
			</LineStyle>
		</Style>
		<Style id="branch_style7">
			<LineStyle>
				<color>ff1200fa</color>
				<width>4.0</width>
			</LineStyle>
		</Style>
		<Style id="branch_style7">
			<LineStyle>
				<color>ff1200fa</color>
				<width>4.0</width>
			</LineStyle>
		</Style>
		<Style id="branch_style7">
			<LineStyle>
				<color>ff1200fa</color>
				<width>4.0</width>
			</LineStyle>
		</Style>
		<Style id="branch_style7">
			<LineStyle>
				<color>ff1200fa</color>
				<width>4.0</width>
			</LineStyle>
		</Style>
		<Style id="branch_style7">
			<LineStyle>
				<color>ff1200fa</color>
				<width>4.0</width>
			</LineStyle>
		</Style>
		<Style id="branch_style7">
			<LineStyle>
				<color>ff1200fa</color>
				<width>4.0</width>
			</LineStyle>
		</Style>
		<Style id="branch_style7">
			<LineStyle>
				<color>ff1200fa</color>
				<width>4.0</width>
			</LineStyle>
		</Style>
		<Style id="branch_style7">
			<LineStyle>
				<color>ff1200fa</color>
				<width>4.0</width>
			</LineStyle>
		</Style>
		<Style id="branch_style7">
			<LineStyle>
				<color>ff1200fa</color>
				<width>4.0</width>
			</LineStyle>
		</Style>
		<Style id="branch_style7">
			<LineStyle>
				<color>ff1200fa</color>
				<width>4.0</width>
			</LineStyle>
		</Style>
		<Style id="branch_style7">
			<LineStyle>
				<color>ff1200fa</color>
				<width>4.0</width>
			</LineStyle>
		</Style>
		<Style id="branch_style7">
			<LineStyle>
				<color>ff1200fa</color>
				<width>4.0</width>
			</LineStyle>
		</Style>
		<Style id="branch_style7">
			<LineStyle>
				<color>ff1200fa</color>
				<width>4.0</width>
			</LineStyle>
		</Style>
		<Style id="branch_style7">
			<LineStyle>
				<color>ff1200fa</color>
				<width>4.0</width>
			</LineStyle>
		</Style>
		<Style id="branch_style7">
			<LineStyle>
				<color>ff1200fa</color>
				<width>4.0</width>
			</LineStyle>
		</Style>
		<Style id="branch_style7">
			<LineStyle>
				<color>ff1200fa</color>
				<width>4.0</width>
			</LineStyle>
		</Style>
		<Style id="branch_style7">
			<LineStyle>
				<color>ff1200fa</color>
				<width>4.0</width>
			</LineStyle>
		</Style>
		<Style id="branch_style7">
			<LineStyle>
				<color>ff1200fa</color>
				<width>4.0</width>
			</LineStyle>
		</Style>
		<Style id="branch_style7">
			<LineStyle>
				<color>ff1200fa</color>
				<width>4.0</width>
			</LineStyle>
		</Style>
		<Style id="branch_style7">
			<LineStyle>
				<color>ff1200fa</color>
				<width>4.0</width>
			</LineStyle>
		</Style>
		<Style id="branch_style7">
			<LineStyle>
				<color>ff1200fa</color>
				<width>4.0</width>
			</LineStyle>
		</Style>
		<Style id="branch_style7">
			<LineStyle>
				<color>ff1200fa</color>
				<width>4.0</width>
			</LineStyle>
		</Style>
		<Style id="branch_style7">
			<LineStyle>
				<color>ff1200fa</color>
				<width>4.0</width>
			</LineStyle>
		</Style>
		<Style id="branch_style7">
			<LineStyle>
				<color>ff1200fa</color>
				<width>4.0</width>
			</LineStyle>
		</Style>
		<Style id="branch_style7">
			<LineStyle>
				<color>ff1200fa</color>
				<width>4.0</width>
			</LineStyle>
		</Style>
		<Style id="branch_style7">
			<LineStyle>
				<color>ff1200fa</color>
				<width>4.0</width>
			</LineStyle>
		</Style>
		<Style id="branch_style7">
			<LineStyle>
				<color>ff1200fa</color>
				<width>4.0</width>
			</LineStyle>
		</Style>
		<Style id="branch_style7">
			<LineStyle>
				<color>ff1200fa</color>
				<width>4.0</width>
			</LineStyle>
		</Style>
		<Style id="branch_style7">
			<LineStyle>
				<color>ff1200fa</color>
				<width>4.0</width>
			</LineStyle>
		</Style>
		<Style id="branch_style7">
			<LineStyle>
				<color>ff1200fa</color>
				<width>4.0</width>
			</LineStyle>
		</Style>
		<Style id="branch_style7">
			<LineStyle>
				<color>ff1200fa</color>
				<width>4.0</width>
			</LineStyle>
		</Style>
		<Style id="branch_style7">
			<LineStyle>
				<color>ff1200fa</color>
				<width>4.0</width>
			</LineStyle>
		</Style>
		<Style id="branch_style7">
			<LineStyle>
				<color>ff1200fa</color>
				<width>4.0</width>
			</LineStyle>
		</Style>
		<Style id="branch_style7">
			<LineStyle>
				<color>ff1200fa</color>
				<width>4.0</width>
			</LineStyle>
		</Style>
		<Style id="branch_style7">
			<LineStyle>
				<color>ff1200fa</color>
				<width>4.0</width>
			</LineStyle>
		</Style>
		<Style id="branch_style7">
			<LineStyle>
				<color>ff1200fa</color>
				<width>4.0</width>
			</LineStyle>
		</Style>
		<Style id="branch_style7">
			<LineStyle>
				<color>ff1200fa</color>
				<width>4.0</width>
			</LineStyle>
		</Style>
		<Style id="branch_style7">
			<LineStyle>
				<color>ff1200fa</color>
				<width>4.0</width>
			</LineStyle>
		</Style>
		<Style id="branch_style7">
			<LineStyle>
				<color>ff1200fa</color>
				<width>4.0</width>
			</LineStyle>
		</Style>
		<Style id="branch_style7">
			<LineStyle>
				<color>ff1200fa</color>
				<width>4.0</width>
			</LineStyle>
		</Style>
		<Style id="branch_style7">
			<LineStyle>
				<color>ff1200fa</color>
				<width>4.0</width>
			</LineStyle>
		</Style>
		<Style id="branch_style7">
			<LineStyle>
				<color>ff1200fa</color>
				<width>4.0</width>
			</LineStyle>
		</Style>
		<Style id="branch_style7">
			<LineStyle>
				<color>ff1200fa</color>
				<width>4.0</width>
			</LineStyle>
		</Style>
		<Style id="branch_style7">
			<LineStyle>
				<color>ff1200fa</color>
				<width>4.0</width>
			</LineStyle>
		</Style>
		<Style id="branch_style7">
			<LineStyle>
				<color>ff1200fa</color>
				<width>4.0</width>
			</LineStyle>
		</Style>
		<Style id="branch_style7">
			<LineStyle>
				<color>ff1200fa</color>
				<width>4.0</width>
			</LineStyle>
		</Style>
		<Style id="branch_style7">
			<LineStyle>
				<color>ff1200fa</color>
				<width>4.0</width>
			</LineStyle>
		</Style>
		<Style id="branch_style7">
			<LineStyle>
				<color>ff1200fa</color>
				<width>4.0</width>
			</LineStyle>
		</Style>
		<Style id="branch_style7">
			<LineStyle>
				<color>ff1200fa</color>
				<width>4.0</width>
			</LineStyle>
		</Style>
		<Style id="branch_style7">
			<LineStyle>
				<color>ff1200fa</color>
				<width>4.0</width>
			</LineStyle>
		</Style>
		<Style id="branch_style7">
			<LineStyle>
				<color>ff1200fa</color>
				<width>4.0</width>
			</LineStyle>
		</Style>
		<Style id="branch_style7">
			<LineStyle>
				<color>ff1200fa</color>
				<width>4.0</width>
			</LineStyle>
		</Style>
		<Style id="branch_style7">
			<LineStyle>
				<color>ff1200fa</color>
				<width>4.0</width>
			</LineStyle>
		</Style>
		<Style id="branch_style7">
			<LineStyle>
				<color>ff1200fa</color>
				<width>4.0</width>
			</LineStyle>
		</Style>
		<Style id="branch_style7">
			<LineStyle>
				<color>ff1200fa</color>
				<width>4.0</width>
			</LineStyle>
		</Style>
		<Style id="branch_style7">
			<LineStyle>
				<color>ff1200fa</color>
				<width>4.0</width>
			</LineStyle>
		</Style>
		<Style id="branch_style7">
			<LineStyle>
				<color>ff1200fa</color>
				<width>4.0</width>
			</LineStyle>
		</Style>
		<Style id="branch_style7">
			<LineStyle>
				<color>ff1200fa</color>
				<width>4.0</width>
			</LineStyle>
		</Style>
		<Style id="branch_style7">
			<LineStyle>
				<color>ff1200fa</color>
				<width>4.0</width>
			</LineStyle>
		</Style>
		<Style id="branch_style7">
			<LineStyle>
				<color>ff1200fa</color>
				<width>4.0</width>
			</LineStyle>
		</Style>
		<Style id="branch_style7">
			<LineStyle>
				<color>ff1200fa</color>
				<width>4.0</width>
			</LineStyle>
		</Style>
		<Style id="branch_style7">
			<LineStyle>
				<color>ff1200fa</color>
				<width>4.0</width>
			</LineStyle>
		</Style>
		<Style id="branch_style7">
			<LineStyle>
				<color>ff1200fa</color>
				<width>4.0</width>
			</LineStyle>
		</Style>
		<Style id="branch_style7">
			<LineStyle>
				<color>ff1200fa</color>
				<width>4.0</width>
			</LineStyle>
		</Style>
		<Style id="branch_style7">
			<LineStyle>
				<color>ff1200fa</color>
				<width>4.0</width>
			</LineStyle>
		</Style>
		<Style id="branch_style7">
			<LineStyle>
				<color>ff1200fa</color>
				<width>4.0</width>
			</LineStyle>
		</Style>
		<Style id="branch_style7">
			<LineStyle>
				<color>ff1200fa</color>
				<width>4.0</width>
			</LineStyle>
		</Style>
		<Style id="branch_style7">
			<LineStyle>
				<color>ff1200fa</color>
				<width>4.0</width>
			</LineStyle>
		</Style>
		<Style id="branch_style7">
			<LineStyle>
				<color>ff1200fa</color>
				<width>4.0</width>
			</LineStyle>
		</Style>
		<Style id="branch_style7">
			<LineStyle>
				<color>ff1200fa</color>
				<width>4.0</width>
			</LineStyle>
		</Style>
		<Style id="branch_style7">
			<LineStyle>
				<color>ff1200fa</color>
				<width>4.0</width>
			</LineStyle>
		</Style>
		<Style id="branch_style7">
			<LineStyle>
				<color>ff1200fa</color>
				<width>4.0</width>
			</LineStyle>
		</Style>
		<Style id="branch_style7">
			<LineStyle>
				<color>ff1200fa</color>
				<width>4.0</width>
			</LineStyle>
		</Style>
		<Style id="circle_style1">
			<PolyStyle>
				<color>ff0056fc</color>
				<outline>0</outline>
			</PolyStyle>
		</Style>
		<Style id="circle_style2">
			<PolyStyle>
				<color>ff0056fc</color>
				<outline>0</outline>
			</PolyStyle>
		</Style>
		<Style id="circle_style3">
			<PolyStyle>
				<color>ff0056fc</color>
				<outline>0</outline>
			</PolyStyle>
		</Style>
		<Style id="circle_style4">
			<PolyStyle>
				<color>ff0056fc</color>
				<outline>0</outline>
			</PolyStyle>
		</Style>
		<Style id="circle_style5">
			<PolyStyle>
				<color>ff0056fc</color>
				<outline>0</outline>
			</PolyStyle>
		</Style>
		<Style id="circle_style6">
			<PolyStyle>
				<color>ff0056fc</color>
				<outline>0</outline>
			</PolyStyle>
		</Style>
		<Style id="circle_style7">
			<PolyStyle>
				<color>ff0056fc</color>
				<outline>0</outline>
			</PolyStyle>
		</Style>
		<Style id="circle_style8">
			<PolyStyle>
				<color>ff0056fc</color>
				<outline>0</outline>
			</PolyStyle>
		</Style>
		<Style id="circle_style9">
			<PolyStyle>
				<color>ff0056fc</color>
				<outline>0</outline>
			</PolyStyle>
		</Style>
		<Style id="circle_style10">
			<PolyStyle>
				<color>ff0056fc</color>
				<outline>0</outline>
			</PolyStyle>
		</Style>
		<Style id="circle_style11">
			<PolyStyle>
				<color>ff0056fc</color>
				<outline>0</outline>
			</PolyStyle>
		</Style>
		<Style id="circle_style12">
			<PolyStyle>
				<color>ff0056fc</color>
				<outline>0</outline>
			</PolyStyle>
		</Style>
		<Style id="circle_style13">
			<PolyStyle>
				<color>ff0056fc</color>
				<outline>0</outline>
			</PolyStyle>
		</Style>
		<Style id="circle_style14">
			<PolyStyle>
				<color>ff0056fc</color>
				<outline>0</outline>
			</PolyStyle>
		</Style>
		<Style id="circle_style15">
			<PolyStyle>
				<color>ff0056fc</color>
				<outline>0</outline>
			</PolyStyle>
		</Style>
		<Style id="circle_style16">
			<PolyStyle>
				<color>ff0056fc</color>
				<outline>0</outline>
			</PolyStyle>
		</Style>
		<Style id="circle_style17">
			<PolyStyle>
				<color>ff0056fc</color>
				<outline>0</outline>
			</PolyStyle>
		</Style>
		<Style id="circle_style18">
			<PolyStyle>
				<color>ff0056fc</color>
				<outline>0</outline>
			</PolyStyle>
		</Style>
		<Style id="circle_style19">
			<PolyStyle>
				<color>ff0056fc</color>
				<outline>0</outline>
			</PolyStyle>
		</Style>
		<Style id="circle_style20">
			<PolyStyle>
				<color>ff0056fc</color>
				<outline>0</outline>
			</PolyStyle>
		</Style>
		<Style id="circle_style21">
			<PolyStyle>
				<color>ff0056fc</color>
				<outline>0</outline>
			</PolyStyle>
		</Style>
		<Style id="circle_style22">
			<PolyStyle>
				<color>ff0056fc</color>
				<outline>0</outline>
			</PolyStyle>
		</Style>
		<Style id="circle_style23">
			<PolyStyle>
				<color>ff0056fc</color>
				<outline>0</outline>
			</PolyStyle>
		</Style>
		<Style id="circle_style24">
			<PolyStyle>
				<color>ff0056fc</color>
				<outline>0</outline>
			</PolyStyle>
		</Style>
		<Style id="circle_style25">
			<PolyStyle>
				<color>ff0056fc</color>
				<outline>0</outline>
			</PolyStyle>
		</Style>
		<Style id="circle_style26">
			<PolyStyle>
				<color>ff0056fc</color>
				<outline>0</outline>
			</PolyStyle>
		</Style>
		<Style id="circle_style27">
			<PolyStyle>
				<color>ff0056fc</color>
				<outline>0</outline>
			</PolyStyle>
		</Style>
		<Style id="circle_style28">
			<PolyStyle>
				<color>ff0056fc</color>
				<outline>0</outline>
			</PolyStyle>
		</Style>
		<Style id="circle_style29">
			<PolyStyle>
				<color>ff0056fc</color>
				<outline>0</outline>
			</PolyStyle>
		</Style>
		<Style id="circle_style30">
			<PolyStyle>
				<color>ff0056fc</color>
				<outline>0</outline>
			</PolyStyle>
		</Style>
		<Style id="circle_style31">
			<PolyStyle>
				<color>ff0056fc</color>
				<outline>0</outline>
			</PolyStyle>
		</Style>
		<Style id="circle_style32">
			<PolyStyle>
				<color>ff0056fc</color>
				<outline>0</outline>
			</PolyStyle>
		</Style>
		<Style id="circle_style33">
			<PolyStyle>
				<color>ff0056fc</color>
				<outline>0</outline>
			</PolyStyle>
		</Style>
		<Style id="circle_style34">
			<PolyStyle>
				<color>ff0056fc</color>
				<outline>0</outline>
			</PolyStyle>
		</Style>
		<Style id="circle_style35">
			<PolyStyle>
				<color>ff0056fc</color>
				<outline>0</outline>
			</PolyStyle>
		</Style>
		<Style id="circle_style36">
			<PolyStyle>
				<color>ff0056fc</color>
				<outline>0</outline>
			</PolyStyle>
		</Style>
		<Style id="circle_style37">
			<PolyStyle>
				<color>ff0056fc</color>
				<outline>0</outline>
			</PolyStyle>
		</Style>
		<Style id="circle_style38">
			<PolyStyle>
				<color>ff0056fc</color>
				<outline>0</outline>
			</PolyStyle>
		</Style>
		<Style id="circle_style39">
			<PolyStyle>
				<color>ff0056fc</color>
				<outline>0</outline>
			</PolyStyle>
		</Style>
		<Style id="circle_style40">
			<PolyStyle>
				<color>ff0056fc</color>
				<outline>0</outline>
			</PolyStyle>
		</Style>
		<Style id="circle_style41">
			<PolyStyle>
				<color>ff0056fc</color>
				<outline>0</outline>
			</PolyStyle>
		</Style>
		<Style id="circle_style42">
			<PolyStyle>
				<color>ff0056fc</color>
				<outline>0</outline>
			</PolyStyle>
		</Style>
		<Style id="circle_style43">
			<PolyStyle>
				<color>ff0056fc</color>
				<outline>0</outline>
			</PolyStyle>
		</Style>
		<Style id="circle_style44">
			<PolyStyle>
				<color>ff0056fc</color>
				<outline>0</outline>
			</PolyStyle>
		</Style>
		<Style id="circle_style45">
			<PolyStyle>
				<color>ff0051fc</color>
				<outline>0</outline>
			</PolyStyle>
		</Style>
		<Style id="circle_style46">
			<PolyStyle>
				<color>ff0051fc</color>
				<outline>0</outline>
			</PolyStyle>
		</Style>
		<Style id="circle_style47">
			<PolyStyle>
				<color>ff0051fc</color>
				<outline>0</outline>
			</PolyStyle>
		</Style>
		<Style id="circle_style48">
			<PolyStyle>
				<color>ff0051fc</color>
				<outline>0</outline>
			</PolyStyle>
		</Style>
		<Style id="circle_style49">
			<PolyStyle>
				<color>ff0051fc</color>
				<outline>0</outline>
			</PolyStyle>
		</Style>
		<Style id="circle_style50">
			<PolyStyle>
				<color>ff0051fc</color>
				<outline>0</outline>
			</PolyStyle>
		</Style>
		<Style id="circle_style51">
			<PolyStyle>
				<color>ff0051fc</color>
				<outline>0</outline>
			</PolyStyle>
		</Style>
		<Style id="circle_style52">
			<PolyStyle>
				<color>ff0051fc</color>
				<outline>0</outline>
			</PolyStyle>
		</Style>
		<Style id="circle_style53">
			<PolyStyle>
				<color>ff0051fc</color>
				<outline>0</outline>
			</PolyStyle>
		</Style>
		<Style id="circle_style54">
			<PolyStyle>
				<color>ff0051fc</color>
				<outline>0</outline>
			</PolyStyle>
		</Style>
		<Style id="circle_style55">
			<PolyStyle>
				<color>ff004dfc</color>
				<outline>0</outline>
			</PolyStyle>
		</Style>
		<Style id="circle_style56">
			<PolyStyle>
				<color>ff004dfc</color>
				<outline>0</outline>
			</PolyStyle>
		</Style>
		<Style id="circle_style57">
			<PolyStyle>
				<color>ff004dfc</color>
				<outline>0</outline>
			</PolyStyle>
		</Style>
		<Style id="circle_style58">
			<PolyStyle>
				<color>ff004dfc</color>
				<outline>0</outline>
			</PolyStyle>
		</Style>
		<Style id="circle_style59">
			<PolyStyle>
				<color>ff004dfc</color>
				<outline>0</outline>
			</PolyStyle>
		</Style>
		<Style id="circle_style60">
			<PolyStyle>
				<color>ff004dfc</color>
				<outline>0</outline>
			</PolyStyle>
		</Style>
		<Style id="circle_style61">
			<PolyStyle>
				<color>ff004dfc</color>
				<outline>0</outline>
			</PolyStyle>
		</Style>
		<Style id="circle_style62">
			<PolyStyle>
				<color>ff004dfc</color>
				<outline>0</outline>
			</PolyStyle>
		</Style>
		<Style id="circle_style63">
			<PolyStyle>
				<color>ff0056fc</color>
				<outline>0</outline>
			</PolyStyle>
		</Style>
		<Style id="circle_style64">
			<PolyStyle>
				<color>ff0056fc</color>
				<outline>0</outline>
			</PolyStyle>
		</Style>
		<Style id="circle_style65">
			<PolyStyle>
				<color>ff0051fc</color>
				<outline>0</outline>
			</PolyStyle>
		</Style>
		<Style id="circle_style66">
			<PolyStyle>
				<color>ff0051fc</color>
				<outline>0</outline>
			</PolyStyle>
		</Style>
		<Style id="circle_style67">
			<PolyStyle>
				<color>ff0051fc</color>
				<outline>0</outline>
			</PolyStyle>
		</Style>
		<Style id="circle_style68">
			<PolyStyle>
				<color>ff0056fc</color>
				<outline>0</outline>
			</PolyStyle>
		</Style>
		<Style id="circle_style69">
			<PolyStyle>
				<color>ff0051fc</color>
				<outline>0</outline>
			</PolyStyle>
		</Style>
		<Style id="circle_style70">
			<PolyStyle>
				<color>ff0056fc</color>
				<outline>0</outline>
			</PolyStyle>
		</Style>
		<Style id="circle_style71">
			<PolyStyle>
				<color>ff0051fc</color>
				<outline>0</outline>
			</PolyStyle>
		</Style>
		<Style id="circle_style72">
			<PolyStyle>
				<color>ff0056fc</color>
				<outline>0</outline>
			</PolyStyle>
		</Style>
		<Style id="circle_style73">
			<PolyStyle>
				<color>ff0051fc</color>
				<outline>0</outline>
			</PolyStyle>
		</Style>
		<Style id="circle_style74">
			<PolyStyle>
				<color>ff0056fc</color>
				<outline>0</outline>
			</PolyStyle>
		</Style>
		<Style id="circle_style75">
			<PolyStyle>
				<color>ff0051fc</color>
				<outline>0</outline>
			</PolyStyle>
		</Style>
		<Style id="circle_style76">
			<PolyStyle>
				<color>ff0056fc</color>
				<outline>0</outline>
			</PolyStyle>
		</Style>
		<Style id="circle_style77">
			<PolyStyle>
				<color>ff0051fc</color>
				<outline>0</outline>
			</PolyStyle>
		</Style>
		<Style id="circle_style78">
			<PolyStyle>
				<color>ff0056fc</color>
				<outline>0</outline>
			</PolyStyle>
		</Style>
		<Style id="circle_style79">
			<PolyStyle>
				<color>ff0051fc</color>
				<outline>0</outline>
			</PolyStyle>
		</Style>
		<Style id="circle_style80">
			<PolyStyle>
				<color>ff0056fc</color>
				<outline>0</outline>
			</PolyStyle>
		</Style>
		<Style id="circle_style81">
			<PolyStyle>
				<color>ff0051fc</color>
				<outline>0</outline>
			</PolyStyle>
		</Style>
		<Style id="circle_style82">
			<PolyStyle>
				<color>ff0051fc</color>
				<outline>0</outline>
			</PolyStyle>
		</Style>
		<Style id="circle_style83">
			<PolyStyle>
				<color>ff0051fc</color>
				<outline>0</outline>
			</PolyStyle>
		</Style>
		<Style id="circle_style84">
			<PolyStyle>
				<color>ff0051fc</color>
				<outline>0</outline>
			</PolyStyle>
		</Style>
		<Style id="circle_style85">
			<PolyStyle>
				<color>ff004dfc</color>
				<outline>0</outline>
			</PolyStyle>
		</Style>
		<Style id="circle_style86">
			<PolyStyle>
				<color>ff004dfc</color>
				<outline>0</outline>
			</PolyStyle>
		</Style>
		<Style id="circle_style87">
			<PolyStyle>
				<color>ff0049fc</color>
				<outline>0</outline>
			</PolyStyle>
		</Style>
		<Style id="circle_style88">
			<PolyStyle>
				<color>ff0044fc</color>
				<outline>0</outline>
			</PolyStyle>
		</Style>
		<Style id="circle_style89">
			<PolyStyle>
				<color>ff0040fd</color>
				<outline>0</outline>
			</PolyStyle>
		</Style>
		<Style id="circle_style90">
			<PolyStyle>
				<color>ff003bfd</color>
				<outline>0</outline>
			</PolyStyle>
		</Style>
		<Style id="circle_style91">
			<PolyStyle>
				<color>ff0033fd</color>
				<outline>0</outline>
			</PolyStyle>
		</Style>
		<Style id="circle_style92">
			<PolyStyle>
				<color>ff002afd</color>
				<outline>0</outline>
			</PolyStyle>
		</Style>
		<Style id="circle_style93">
			<PolyStyle>
				<color>ff0056fc</color>
				<outline>0</outline>
			</PolyStyle>
		</Style>
		<Style id="circle_style94">
			<PolyStyle>
				<color>ff0021fe</color>
				<outline>0</outline>
			</PolyStyle>
		</Style>
		<Style id="circle_style95">
			<PolyStyle>
				<color>ff0056fc</color>
				<outline>0</outline>
			</PolyStyle>
		</Style>
		<Style id="circle_style96">
			<PolyStyle>
				<color>ff0010fe</color>
				<outline>0</outline>
			</PolyStyle>
		</Style>
		<Style id="circle_style97">
			<PolyStyle>
				<color>ff0056fc</color>
				<outline>0</outline>
			</PolyStyle>
		</Style>
		<Style id="circle_style98">
			<PolyStyle>
				<color>ff0002ff</color>
				<outline>0</outline>
			</PolyStyle>
		</Style>
		<Style id="circle_style99">
			<PolyStyle>
				<color>ff0051fc</color>
				<outline>0</outline>
			</PolyStyle>
		</Style>
		<Style id="circle_style100">
			<PolyStyle>
				<color>ff0051fc</color>
				<outline>0</outline>
			</PolyStyle>
		</Style>
		<Style id="circle_style101">
			<PolyStyle>
				<color>ff0051fc</color>
				<outline>0</outline>
			</PolyStyle>
		</Style>
		<Style id="circle_style102">
			<PolyStyle>
				<color>ff0051fc</color>
				<outline>0</outline>
			</PolyStyle>
		</Style>
		<Style id="circle_style103">
			<PolyStyle>
				<color>ff0051fc</color>
				<outline>0</outline>
			</PolyStyle>
		</Style>
		<Style id="circle_style104">
			<PolyStyle>
				<color>ff0051fc</color>
				<outline>0</outline>
			</PolyStyle>
		</Style>
		<Style id="circle_style105">
			<PolyStyle>
				<color>ff0051fc</color>
				<outline>0</outline>
			</PolyStyle>
		</Style>
		<Style id="circle_style106">
			<PolyStyle>
				<color>ff0051fc</color>
				<outline>0</outline>
			</PolyStyle>
		</Style>
		<Style id="circle_style107">
			<PolyStyle>
				<color>ff0051fc</color>
				<outline>0</outline>
			</PolyStyle>
		</Style>
		<Style id="circle_style108">
			<PolyStyle>
				<color>ff0051fc</color>
				<outline>0</outline>
			</PolyStyle>
		</Style>
		<Style id="circle_style109">
			<PolyStyle>
				<color>ff0051fc</color>
				<outline>0</outline>
			</PolyStyle>
		</Style>
		<Style id="circle_style110">
			<PolyStyle>
				<color>ff0051fc</color>
				<outline>0</outline>
			</PolyStyle>
		</Style>
		<Folder>
			<name>Places</name>
			<Placemark>
				<name>Korea</name>
				<Point>
					<altitudeMode>relativeToGround</altitudeMode>
					<coordinates>127.58,37.39,0.0</coordinates>
				</Point>
			</Placemark>
			<Placemark>
				<name>China</name>
				<Point>
					<altitudeMode>relativeToGround</altitudeMode>
					<coordinates>104.11,35.51,0.0</coordinates>
				</Point>
			</Placemark>
			<Placemark>
				<name>Canada</name>
				<Point>
					<altitudeMode>relativeToGround</altitudeMode>
					<coordinates>-106.2,56.7,0.0</coordinates>
				</Point>
			</Placemark>
			<Placemark>
				<name>US</name>
				<Point>
					<altitudeMode>relativeToGround</altitudeMode>
					<coordinates>-95.23,37.14,0.0</coordinates>
				</Point>
			</Placemark>
			<Placemark>
				<name>Mexico</name>
				<Point>
					<altitudeMode>relativeToGround</altitudeMode>
					<coordinates>-102.33,23.38,0.0</coordinates>
				</Point>
			</Placemark>
			<Placemark>
				<name>Ecuador</name>
				<Point>
					<altitudeMode>relativeToGround</altitudeMode>
					<coordinates>-78.34,-2.53,0.0</coordinates>
				</Point>
			</Placemark>
		</Folder>
		<Folder>
			<name>Branches</name>
			<Folder>
				<name>US:Korea</name>
				<Placemark>
					<TimeSpan>
						<begin>2014-04-27</begin>
						<end></end>
					</TimeSpan>
					<styleUrl>branch_style1</styleUrl>
					<LineString>
						<tessellate>1</tessellate>
						<altitudeMode>relativeToGround</altitudeMode>
						<coordinates>						-95.2300033569336,37.13999938964844,0.0						 						-96.60421180619151,37.134620703150205,190558.3065822941						</coordinates>
					</LineString>
				</Placemark>
				<Placemark>
					<TimeSpan>
						<begin>2014-04-28</begin>
						<end></end>
					</TimeSpan>
					<styleUrl>branch_style1</styleUrl>
					<LineString>
						<tessellate>1</tessellate>
						<altitudeMode>relativeToGround</altitudeMode>
						<coordinates>						-96.60421180619151,37.134620703150205,190558.3065822941						 						-97.97844494627071,37.12932282908825,377266.95040534995						</coordinates>
					</LineString>
				</Placemark>
				<Placemark>
					<TimeSpan>
						<begin>2014-04-29</begin>
						<end></end>
					</TimeSpan>
					<styleUrl>branch_style1</styleUrl>
					<LineString>
						<tessellate>1</tessellate>
						<altitudeMode>relativeToGround</altitudeMode>
						<coordinates>						-97.97844494627071,37.12932282908825,377266.95040534995						 						-99.35270130077753,37.124106560532226,560125.9314691676						</coordinates>
					</LineString>
				</Placemark>
				<Placemark>
					<TimeSpan>
						<begin>2014-05-01</begin>
						<end></end>
					</TimeSpan>
					<styleUrl>branch_style1</styleUrl>
					<LineString>
						<tessellate>1</tessellate>
						<altitudeMode>relativeToGround</altitudeMode>
						<coordinates>						-99.35270130077753,37.124106560532226,560125.9314691676						 						-100.72697937998218,37.1189727070367,739135.2497737468						</coordinates>
					</LineString>
				</Placemark>
				<Placemark>
					<TimeSpan>
						<begin>2014-05-02</begin>
						<end></end>
					</TimeSpan>
					<styleUrl>branch_style1</styleUrl>
					<LineString>
						<tessellate>1</tessellate>
						<altitudeMode>relativeToGround</altitudeMode>
						<coordinates>						-100.72697937998218,37.1189727070367,739135.2497737468						 						-102.10127768050518,37.11392209515796,914294.9053190879						</coordinates>
					</LineString>
				</Placemark>
				<Placemark>
					<TimeSpan>
						<begin>2014-05-03</begin>
						<end></end>
					</TimeSpan>
					<styleUrl>branch_style1</styleUrl>
					<LineString>
						<tessellate>1</tessellate>
						<altitudeMode>relativeToGround</altitudeMode>
						<coordinates>						-102.10127768050518,37.11392209515796,914294.9053190879						 						-103.47559468499409,37.10895556899263,1085604.8981051908						</coordinates>
					</LineString>
				</Placemark>
				<Placemark>
					<TimeSpan>
						<begin>2014-05-04</begin>
						<end></end>
					</TimeSpan>
					<styleUrl>branch_style1</styleUrl>
					<LineString>
						<tessellate>1</tessellate>
						<altitudeMode>relativeToGround</altitudeMode>
						<coordinates>						-103.47559468499409,37.10895556899263,1085604.8981051908						 						-104.84992886178968,37.10407399073914,1253065.2281320551						</coordinates>
					</LineString>
				</Placemark>
				<Placemark>
					<TimeSpan>
						<begin>2014-05-06</begin>
						<end></end>
					</TimeSpan>
					<styleUrl>branch_style1</styleUrl>
					<LineString>
						<tessellate>1</tessellate>
						<altitudeMode>relativeToGround</altitudeMode>
						<coordinates>						-104.84992886178968,37.10407399073914,1253065.2281320551						 						-106.2242786645807,37.09927824128351,1416675.8953996815						</coordinates>
					</LineString>
				</Placemark>
				<Placemark>
					<TimeSpan>
						<begin>2014-05-07</begin>
						<end></end>
					</TimeSpan>
					<styleUrl>branch_style1</styleUrl>
					<LineString>
						<tessellate>1</tessellate>
						<altitudeMode>relativeToGround</altitudeMode>
						<coordinates>						-106.2242786645807,37.09927824128351,1416675.8953996815						 						-107.59864253204746,37.094569220810506,1576436.8999080695						</coordinates>
					</LineString>
				</Placemark>
				<Placemark>
					<TimeSpan>
						<begin>2014-05-08</begin>
						<end></end>
					</TimeSpan>
					<styleUrl>branch_style1</styleUrl>
					<LineString>
						<tessellate>1</tessellate>
						<altitudeMode>relativeToGround</altitudeMode>
						<coordinates>						-107.59864253204746,37.094569220810506,1576436.8999080695						 						-108.9730188874937,37.089947849441785,1732348.2416572194						</coordinates>
					</LineString>
				</Placemark>
				<Placemark>
					<TimeSpan>
						<begin>2014-05-09</begin>
						<end></end>
					</TimeSpan>
					<styleUrl>branch_style1</styleUrl>
					<LineString>
						<tessellate>1</tessellate>
						<altitudeMode>relativeToGround</altitudeMode>
						<coordinates>						-108.9730188874937,37.089947849441785,1732348.2416572194						 						-110.34740613846503,37.0854150679024,1884409.9206471306						</coordinates>
					</LineString>
				</Placemark>
				<Placemark>
					<TimeSpan>
						<begin>2014-05-11</begin>
						<end></end>
					</TimeSpan>
					<styleUrl>branch_style1</styleUrl>
					<LineString>
						<tessellate>1</tessellate>
						<altitudeMode>relativeToGround</altitudeMode>
						<coordinates>						-110.34740613846503,37.0854150679024,1884409.9206471306						 						-111.72180267635501,37.080971838217245,2032621.9368778039						</coordinates>
					</LineString>
				</Placemark>
				<Placemark>
					<TimeSpan>
						<begin>2014-05-12</begin>
						<end></end>
					</TimeSpan>
					<styleUrl>branch_style1</styleUrl>
					<LineString>
						<tessellate>1</tessellate>
						<altitudeMode>relativeToGround</altitudeMode>
						<coordinates>						-111.72180267635501,37.080971838217245,2032621.9368778039						 						-113.09620687599711,37.076619144439256,2176984.290349239						</coordinates>
					</LineString>
				</Placemark>
				<Placemark>
					<TimeSpan>
						<begin>2014-05-13</begin>
						<end></end>
					</TimeSpan>
					<styleUrl>branch_style1</styleUrl>
					<LineString>
						<tessellate>1</tessellate>
						<altitudeMode>relativeToGround</altitudeMode>
						<coordinates>						-113.09620687599711,37.076619144439256,2176984.290349239						 						-114.47061709524232,37.07235799341112,2317496.9810614353						</coordinates>
					</LineString>
				</Placemark>
				<Placemark>
					<TimeSpan>
						<begin>2014-05-14</begin>
						<end></end>
					</TimeSpan>
					<styleUrl>branch_style1</styleUrl>
					<LineString>
						<tessellate>1</tessellate>
						<altitudeMode>relativeToGround</altitudeMode>
						<coordinates>						-114.47061709524232,37.07235799341112,2317496.9810614353						 						-115.8450316745221,37.06818941556242,2454160.0090143937						</coordinates>
					</LineString>
				</Placemark>
				<Placemark>
					<TimeSpan>
						<begin>2014-05-16</begin>
						<end></end>
					</TimeSpan>
					<styleUrl>branch_style1</styleUrl>
					<LineString>
						<tessellate>1</tessellate>
						<altitudeMode>relativeToGround</altitudeMode>
						<coordinates>						-115.8450316745221,37.06818941556242,2454160.0090143937						 						-117.21944893639488,37.064114465744375,2586973.374208114						</coordinates>
					</LineString>
				</Placemark>
				<Placemark>
					<TimeSpan>
						<begin>2014-05-17</begin>
						<end></end>
					</TimeSpan>
					<styleUrl>branch_style1</styleUrl>
					<LineString>
						<tessellate>1</tessellate>
						<altitudeMode>relativeToGround</altitudeMode>
						<coordinates>						-117.21944893639488,37.064114465744375,2586973.374208114						 						-118.59386718507638,37.06013422410429,2715937.076642596						</coordinates>
					</LineString>
				</Placemark>
				<Placemark>
					<TimeSpan>
						<begin>2014-05-18</begin>
						<end></end>
					</TimeSpan>
					<styleUrl>branch_style1</styleUrl>
					<LineString>
						<tessellate>1</tessellate>
						<altitudeMode>relativeToGround</altitudeMode>
						<coordinates>						-118.59386718507638,37.06013422410429,2715937.076642596						 						-119.96828470595261,37.05624979700229,2841051.11631784						</coordinates>
					</LineString>
				</Placemark>
				<Placemark>
					<TimeSpan>
						<begin>2014-05-19</begin>
						<end></end>
					</TimeSpan>
					<styleUrl>branch_style1</styleUrl>
					<LineString>
						<tessellate>1</tessellate>
						<altitudeMode>relativeToGround</altitudeMode>
						<coordinates>						-119.96828470595261,37.05624979700229,2841051.11631784						 						-121.34269976507478,37.05246231797278,2962315.4932338446						</coordinates>
					</LineString>
				</Placemark>
				<Placemark>
					<TimeSpan>
						<begin>2014-05-21</begin>
						<end></end>
					</TimeSpan>
					<styleUrl>branch_style1</styleUrl>
					<LineString>
						<tessellate>1</tessellate>
						<altitudeMode>relativeToGround</altitudeMode>
						<coordinates>						-121.34269976507478,37.05246231797278,2962315.4932338446						 						-122.71711060863453,37.048772948733394,3079730.207390612						</coordinates>
					</LineString>
				</Placemark>
				<Placemark>
					<TimeSpan>
						<begin>2014-05-22</begin>
						<end></end>
					</TimeSpan>
					<styleUrl>branch_style1</styleUrl>
					<LineString>
						<tessellate>1</tessellate>
						<altitudeMode>relativeToGround</altitudeMode>
						<coordinates>						-122.71711060863453,37.048772948733394,3079730.207390612						 						-124.09151546241975,37.04518288024451,3193295.258788141						</coordinates>
					</LineString>
				</Placemark>
				<Placemark>
					<TimeSpan>
						<begin>2014-05-23</begin>
						<end></end>
					</TimeSpan>
					<styleUrl>branch_style1</styleUrl>
					<LineString>
						<tessellate>1</tessellate>
						<altitudeMode>relativeToGround</altitudeMode>
						<coordinates>						-124.09151546241975,37.04518288024451,3193295.258788141						 						-125.46591253124876,37.04169333382238,3303010.647426431						</coordinates>
					</LineString>
				</Placemark>
				<Placemark>
					<TimeSpan>
						<begin>2014-05-24</begin>
						<end></end>
					</TimeSpan>
					<styleUrl>branch_style1</styleUrl>
					<LineString>
						<tessellate>1</tessellate>
						<altitudeMode>relativeToGround</altitudeMode>
						<coordinates>						-125.46591253124876,37.04169333382238,3303010.647426431						 						-126.84029999838262,37.03830556230946,3408876.373305484						</coordinates>
					</LineString>
				</Placemark>
				<Placemark>
					<TimeSpan>
						<begin>2014-05-26</begin>
						<end></end>
					</TimeSpan>
					<styleUrl>branch_style1</styleUrl>
					<LineString>
						<tessellate>1</tessellate>
						<altitudeMode>relativeToGround</altitudeMode>
						<coordinates>						-126.84029999838262,37.03830556230946,3408876.373305484						 						-128.21467602491384,37.03502085130564,3510892.4364252975						</coordinates>
					</LineString>
				</Placemark>
				<Placemark>
					<TimeSpan>
						<begin>2014-05-27</begin>
						<end></end>
					</TimeSpan>
					<styleUrl>branch_style1</styleUrl>
					<LineString>
						<tessellate>1</tessellate>
						<altitudeMode>relativeToGround</altitudeMode>
						<coordinates>						-128.21467602491384,37.03502085130564,3510892.4364252975						 						-129.58903874913028,37.03184052046418,3609058.8367858734						</coordinates>
					</LineString>
				</Placemark>
				<Placemark>
					<TimeSpan>
						<begin>2014-05-28</begin>
						<end></end>
					</TimeSpan>
					<styleUrl>branch_style1</styleUrl>
					<LineString>
						<tessellate>1</tessellate>
						<altitudeMode>relativeToGround</altitudeMode>
						<coordinates>						-129.58903874913028,37.03184052046418,3609058.8367858734						 						-130.9633862858536,37.02876592485696,3703375.5743872114						</coordinates>
					</LineString>
				</Placemark>
				<Placemark>
					<TimeSpan>
						<begin>2014-05-29</begin>
						<end></end>
					</TimeSpan>
					<styleUrl>branch_style1</styleUrl>
					<LineString>
						<tessellate>1</tessellate>
						<altitudeMode>relativeToGround</altitudeMode>
						<coordinates>						-130.9633862858536,37.02876592485696,3703375.5743872114						 						-132.33771672574994,37.0257984564136,3793842.6492293105						</coordinates>
					</LineString>
				</Placemark>
				<Placemark>
					<TimeSpan>
						<begin>2014-05-31</begin>
						<end></end>
					</TimeSpan>
					<styleUrl>branch_style1</styleUrl>
					<LineString>
						<tessellate>1</tessellate>
						<altitudeMode>relativeToGround</altitudeMode>
						<coordinates>						-132.33771672574994,37.0257984564136,3793842.6492293105						 						-133.71202813461122,37.02293954543936,3880460.0613121707						</coordinates>
					</LineString>
				</Placemark>
				<Placemark>
					<TimeSpan>
						<begin>2014-06-01</begin>
						<end></end>
					</TimeSpan>
					<styleUrl>branch_style1</styleUrl>
					<LineString>
						<tessellate>1</tessellate>
						<altitudeMode>relativeToGround</altitudeMode>
						<coordinates>						-133.71202813461122,37.02293954543936,3880460.0613121707						 						-135.0863185526069,37.020190662217644,3963227.810635794						</coordinates>
					</LineString>
				</Placemark>
				<Placemark>
					<TimeSpan>
						<begin>2014-06-02</begin>
						<end></end>
					</TimeSpan>
					<styleUrl>branch_style1</styleUrl>
					<LineString>
						<tessellate>1</tessellate>
						<altitudeMode>relativeToGround</altitudeMode>
						<coordinates>						-135.0863185526069,37.020190662217644,3963227.810635794						 						-136.4605859935026,37.01755331870272,4042145.8972001784						</coordinates>
					</LineString>
				</Placemark>
				<Placemark>
					<TimeSpan>
						<begin>2014-06-03</begin>
						<end></end>
					</TimeSpan>
					<styleUrl>branch_style1</styleUrl>
					<LineString>
						<tessellate>1</tessellate>
						<altitudeMode>relativeToGround</altitudeMode>
						<coordinates>						-136.4605859935026,37.01755331870272,4042145.8972001784						 						-137.8348284438447,37.01502907030927,4117214.321005325						</coordinates>
					</LineString>
				</Placemark>
				<Placemark>
					<TimeSpan>
						<begin>2014-06-05</begin>
						<end></end>
					</TimeSpan>
					<styleUrl>branch_style1</styleUrl>
					<LineString>
						<tessellate>1</tessellate>
						<altitudeMode>relativeToGround</altitudeMode>
						<coordinates>						-137.8348284438447,37.01502907030927,4117214.321005325						 						-139.2090438621091,37.012619517805824,4188433.0820512325						</coordinates>
					</LineString>
				</Placemark>
				<Placemark>
					<TimeSpan>
						<begin>2014-06-06</begin>
						<end></end>
					</TimeSpan>
					<styleUrl>branch_style1</styleUrl>
					<LineString>
						<tessellate>1</tessellate>
						<altitudeMode>relativeToGround</altitudeMode>
						<coordinates>						-139.2090438621091,37.012619517805824,4188433.0820512325						 						-140.58323017781083,37.01032630931963,4255802.180337902						</coordinates>
					</LineString>
				</Placemark>
				<Placemark>
					<TimeSpan>
						<begin>2014-06-07</begin>
						<end></end>
					</TimeSpan>
					<styleUrl>branch_style1</styleUrl>
					<LineString>
						<tessellate>1</tessellate>
						<altitudeMode>relativeToGround</altitudeMode>
						<coordinates>						-140.58323017781083,37.01032630931963,4255802.180337902						 						-141.957385290574,37.00815114246131,4319321.615865334						</coordinates>
					</LineString>
				</Placemark>
				<Placemark>
					<TimeSpan>
						<begin>2014-06-08</begin>
						<end></end>
					</TimeSpan>
					<styleUrl>branch_style1</styleUrl>
					<LineString>
						<tessellate>1</tessellate>
						<altitudeMode>relativeToGround</altitudeMode>
						<coordinates>						-141.957385290574,37.00815114246131,4319321.615865334						 						-143.3315070691574,37.006095766578404,4378991.388633527						</coordinates>
					</LineString>
				</Placemark>
				<Placemark>
					<TimeSpan>
						<begin>2014-06-10</begin>
						<end></end>
					</TimeSpan>
					<styleUrl>branch_style1</styleUrl>
					<LineString>
						<tessellate>1</tessellate>
						<altitudeMode>relativeToGround</altitudeMode>
						<coordinates>						-143.3315070691574,37.006095766578404,4378991.388633527						 						-144.70559335043512,37.00416198514765,4434811.498642482						</coordinates>
					</LineString>
				</Placemark>
				<Placemark>
					<TimeSpan>
						<begin>2014-06-11</begin>
						<end></end>
					</TimeSpan>
					<styleUrl>branch_style1</styleUrl>
					<LineString>
						<tessellate>1</tessellate>
						<altitudeMode>relativeToGround</altitudeMode>
						<coordinates>						-144.70559335043512,37.00416198514765,4434811.498642482						 						-146.07964193832765,37.00235165831698,4486781.945892198						</coordinates>
					</LineString>
				</Placemark>
				<Placemark>
					<TimeSpan>
						<begin>2014-06-12</begin>
						<end></end>
					</TimeSpan>
					<styleUrl>branch_style1</styleUrl>
					<LineString>
						<tessellate>1</tessellate>
						<altitudeMode>relativeToGround</altitudeMode>
						<coordinates>						-146.07964193832765,37.00235165831698,4486781.945892198						 						-147.45365060268153,37.00066670560904,4534902.730382676						</coordinates>
					</LineString>
				</Placemark>
				<Placemark>
					<TimeSpan>
						<begin>2014-06-13</begin>
						<end></end>
					</TimeSpan>
					<styleUrl>branch_style1</styleUrl>
					<LineString>
						<tessellate>1</tessellate>
						<altitudeMode>relativeToGround</altitudeMode>
						<coordinates>						-147.45365060268153,37.00066670560904,4534902.730382676						 						-148.82761707809303,36.999109108799146,4579173.8521139175						</coordinates>
					</LineString>
				</Placemark>
				<Placemark>
					<TimeSpan>
						<begin>2014-06-15</begin>
						<end></end>
					</TimeSpan>
					<styleUrl>branch_style1</styleUrl>
					<LineString>
						<tessellate>1</tessellate>
						<altitudeMode>relativeToGround</altitudeMode>
						<coordinates>						-148.82761707809303,36.999109108799146,4579173.8521139175						 						-150.20153906267322,36.99768091498214,4619595.311085918						</coordinates>
					</LineString>
				</Placemark>
				<Placemark>
					<TimeSpan>
						<begin>2014-06-16</begin>
						<end></end>
					</TimeSpan>
					<styleUrl>branch_style1</styleUrl>
					<LineString>
						<tessellate>1</tessellate>
						<altitudeMode>relativeToGround</altitudeMode>
						<coordinates>						-150.20153906267322,36.99768091498214,4619595.311085918						 						-151.57541421674955,36.996384239844,4656167.1072986815						</coordinates>
					</LineString>
				</Placemark>
				<Placemark>
					<TimeSpan>
						<begin>2014-06-17</begin>
						<end></end>
					</TimeSpan>
					<styleUrl>branch_style1</styleUrl>
					<LineString>
						<tessellate>1</tessellate>
						<altitudeMode>relativeToGround</altitudeMode>
						<coordinates>						-151.57541421674955,36.996384239844,4656167.1072986815						 						-152.94924016149986,36.995221271155174,4688889.240752207						</coordinates>
					</LineString>
				</Placemark>
				<Placemark>
					<TimeSpan>
						<begin>2014-06-18</begin>
						<end></end>
					</TimeSpan>
					<styleUrl>branch_style1</styleUrl>
					<LineString>
						<tessellate>1</tessellate>
						<altitudeMode>relativeToGround</altitudeMode>
						<coordinates>						-152.94924016149986,36.995221271155174,4688889.240752207						 						-154.32301447751487,36.994194272505226,4717761.711446494						</coordinates>
					</LineString>
				</Placemark>
				<Placemark>
					<TimeSpan>
						<begin>2014-06-20</begin>
						<end></end>
					</TimeSpan>
					<styleUrl>branch_style1</styleUrl>
					<LineString>
						<tessellate>1</tessellate>
						<altitudeMode>relativeToGround</altitudeMode>
						<coordinates>						-154.32301447751487,36.994194272505226,4717761.711446494						 						-155.69673470328232,36.99330558729953,4742784.519381542						</coordinates>
					</LineString>
				</Placemark>
				<Placemark>
					<TimeSpan>
						<begin>2014-06-21</begin>
						<end></end>
					</TimeSpan>
					<styleUrl>branch_style1</styleUrl>
					<LineString>
						<tessellate>1</tessellate>
						<altitudeMode>relativeToGround</altitudeMode>
						<coordinates>						-155.69673470328232,36.99330558729953,4742784.519381542						 						-157.0703983335885,36.99255764304182,4763957.664557353						</coordinates>
					</LineString>
				</Placemark>
				<Placemark>
					<TimeSpan>
						<begin>2014-06-22</begin>
						<end></end>
					</TimeSpan>
					<styleUrl>branch_style1</styleUrl>
					<LineString>
						<tessellate>1</tessellate>
						<altitudeMode>relativeToGround</altitudeMode>
						<coordinates>						-157.0703983335885,36.99255764304182,4763957.664557353						 						-158.4440028178309,36.99195295592831,4781281.146973927						</coordinates>
					</LineString>
				</Placemark>
				<Placemark>
					<TimeSpan>
						<begin>2014-06-23</begin>
						<end></end>
					</TimeSpan>
					<styleUrl>branch_style1</styleUrl>
					<LineString>
						<tessellate>1</tessellate>
						<altitudeMode>relativeToGround</altitudeMode>
						<coordinates>						-158.4440028178309,36.99195295592831,4781281.146973927						 						-159.81754555823392,36.99149413578234,4794754.96663126						</coordinates>
					</LineString>
				</Placemark>
				<Placemark>
					<TimeSpan>
						<begin>2014-06-25</begin>
						<end></end>
					</TimeSpan>
					<styleUrl>branch_style1</styleUrl>
					<LineString>
						<tessellate>1</tessellate>
						<altitudeMode>relativeToGround</altitudeMode>
						<coordinates>						-159.81754555823392,36.99149413578234,4794754.96663126						 						-161.19102390796274,36.9911838913617,4804379.123529355						</coordinates>
					</LineString>
				</Placemark>
				<Placemark>
					<TimeSpan>
						<begin>2014-06-26</begin>
						<end></end>
					</TimeSpan>
					<styleUrl>branch_style1</styleUrl>
					<LineString>
						<tessellate>1</tessellate>
						<altitudeMode>relativeToGround</altitudeMode>
						<coordinates>						-161.19102390796274,36.9911838913617,4804379.123529355						 						-162.56443516912412,36.9910250360745,4810153.617668212						</coordinates>
					</LineString>
				</Placemark>
				<Placemark>
					<TimeSpan>
						<begin>2014-06-27</begin>
						<end></end>
					</TimeSpan>
					<styleUrl>branch_style1</styleUrl>
					<LineString>
						<tessellate>1</tessellate>
						<altitudeMode>relativeToGround</altitudeMode>
						<coordinates>						-162.56443516912412,36.9910250360745,4810153.617668212						 						-163.9377765906478,36.99102049414351,4812078.449047831						</coordinates>
					</LineString>
				</Placemark>
				<Placemark>
					<TimeSpan>
						<begin>2014-06-28</begin>
						<end></end>
					</TimeSpan>
					<styleUrl>branch_style1</styleUrl>
					<LineString>
						<tessellate>1</tessellate>
						<altitudeMode>relativeToGround</altitudeMode>
						<coordinates>						-163.9377765906478,36.99102049414351,4812078.449047831						 						-165.31104536603732,36.991173307264134,4810153.617668213						</coordinates>
					</LineString>
				</Placemark>
				<Placemark>
					<TimeSpan>
						<begin>2014-06-30</begin>
						<end></end>
					</TimeSpan>
					<styleUrl>branch_style1</styleUrl>
					<LineString>
						<tessellate>1</tessellate>
						<altitudeMode>relativeToGround</altitudeMode>
						<coordinates>						-165.31104536603732,36.991173307264134,4810153.617668213						 						-166.68423863098045,36.99148664180597,4804379.123529356						</coordinates>
					</LineString>
				</Placemark>
				<Placemark>
					<TimeSpan>
						<begin>2014-07-01</begin>
						<end></end>
					</TimeSpan>
					<styleUrl>branch_style1</styleUrl>
					<LineString>
						<tessellate>1</tessellate>
						<altitudeMode>relativeToGround</altitudeMode>
						<coordinates>						-166.68423863098045,36.99148664180597,4804379.123529356						 						-168.0573534608047,36.99196379661504,4794754.96663126						</coordinates>
					</LineString>
				</Placemark>
				<Placemark>
					<TimeSpan>
						<begin>2014-07-02</begin>
						<end></end>
					</TimeSpan>
					<styleUrl>branch_style1</styleUrl>
					<LineString>
						<tessellate>1</tessellate>
						<altitudeMode>relativeToGround</altitudeMode>
						<coordinates>						-168.0573534608047,36.99196379661504,4794754.96663126						 						-169.43038686776822,36.99260821148028,4781281.146973926						</coordinates>
					</LineString>
				</Placemark>
				<Placemark>
					<TimeSpan>
						<begin>2014-07-03</begin>
						<end></end>
					</TimeSpan>
					<styleUrl>branch_style1</styleUrl>
					<LineString>
						<tessellate>1</tessellate>
						<altitudeMode>relativeToGround</altitudeMode>
						<coordinates>						-169.43038686776822,36.99260821148028,4781281.146973926						 						-170.80333579816852,36.9934234763368,4763957.664557353						</coordinates>
					</LineString>
				</Placemark>
				<Placemark>
					<TimeSpan>
						<begin>2014-07-05</begin>
						<end></end>
					</TimeSpan>
					<styleUrl>branch_style1</styleUrl>
					<LineString>
						<tessellate>1</tessellate>
						<altitudeMode>relativeToGround</altitudeMode>
						<coordinates>						-170.80333579816852,36.9934234763368,4763957.664557353						 						-172.17619712925332,36.994413341287455,4742784.519381542						</coordinates>
					</LineString>
				</Placemark>
				<Placemark>
					<TimeSpan>
						<begin>2014-07-06</begin>
						<end></end>
					</TimeSpan>
					<styleUrl>branch_style1</styleUrl>
					<LineString>
						<tessellate>1</tessellate>
						<altitudeMode>relativeToGround</altitudeMode>
						<coordinates>						-172.17619712925332,36.994413341287455,4742784.519381542						 						-173.5489676659156,36.995581727536134,4717761.711446495						</coordinates>
					</LineString>
				</Placemark>
				<Placemark>
					<TimeSpan>
						<begin>2014-07-07</begin>
						<end></end>
					</TimeSpan>
					<styleUrl>branch_style1</styleUrl>
					<LineString>
						<tessellate>1</tessellate>
						<altitudeMode>relativeToGround</altitudeMode>
						<coordinates>						-173.5489676659156,36.995581727536134,4717761.711446495						 						-174.92164413715065,36.99693273933846,4688889.240752207						</coordinates>
					</LineString>
				</Placemark>
				<Placemark>
					<TimeSpan>
						<begin>2014-07-08</begin>
						<end></end>
					</TimeSpan>
					<styleUrl>branch_style1</styleUrl>
					<LineString>
						<tessellate>1</tessellate>
						<altitudeMode>relativeToGround</altitudeMode>
						<coordinates>						-174.92164413715065,36.99693273933846,4688889.240752207						 						-176.29422319225463,36.99847067709135,4656167.1072986815						</coordinates>
					</LineString>
				</Placemark>
				<Placemark>
					<TimeSpan>
						<begin>2014-07-10</begin>
						<end></end>
					</TimeSpan>
					<styleUrl>branch_style1</styleUrl>
					<LineString>
						<tessellate>1</tessellate>
						<altitudeMode>relativeToGround</altitudeMode>
						<coordinates>						-176.29422319225463,36.99847067709135,4656167.1072986815						 						-177.66670139673573,37.000200051700126,4619595.311085918						</coordinates>
					</LineString>
				</Placemark>
				<Placemark>
					<TimeSpan>
						<begin>2014-07-11</begin>
						<end></end>
					</TimeSpan>
					<styleUrl>branch_style1</styleUrl>
					<LineString>
						<tessellate>1</tessellate>
						<altitudeMode>relativeToGround</altitudeMode>
						<coordinates>						-177.66670139673573,37.000200051700126,4619595.311085918						 						-179.0390752279102,37.00212560038311,4579173.852113916						</coordinates>
					</LineString>
				</Placemark>
				<Placemark>
					<TimeSpan>
						<begin>2014-07-12</begin>
						<end></end>
					</TimeSpan>
					<styleUrl>branch_style1</styleUrl>
					<LineString>
						<tessellate>1</tessellate>
						<altitudeMode>relativeToGround</altitudeMode>
						<coordinates>						-179.0390752279102,37.00212560038311,4579173.852113916						 						179.5886589298506,37.00425230409785,4534902.730382677						</coordinates>
					</LineString>
				</Placemark>
				<Placemark>
					<TimeSpan>
						<begin>2014-07-13</begin>
						<end></end>
					</TimeSpan>
					<styleUrl>branch_style1</styleUrl>
					<LineString>
						<tessellate>1</tessellate>
						<altitudeMode>relativeToGround</altitudeMode>
						<coordinates>						179.5886589298506,37.00425230409785,4534902.730382677						 						178.21650479025925,37.006585406802564,4486781.945892199						</coordinates>
					</LineString>
				</Placemark>
				<Placemark>
					<TimeSpan>
						<begin>2014-07-15</begin>
						<end></end>
					</TimeSpan>
					<styleUrl>branch_style1</styleUrl>
					<LineString>
						<tessellate>1</tessellate>
						<altitudeMode>relativeToGround</altitudeMode>
						<coordinates>						178.21650479025925,37.006585406802564,4486781.945892199						 						176.8444661706823,37.00913043680084,4434811.498642482						</coordinates>
					</LineString>
				</Placemark>
				<Placemark>
					<TimeSpan>
						<begin>2014-07-16</begin>
						<end></end>
					</TimeSpan>
					<styleUrl>branch_style1</styleUrl>
					<LineString>
						<tessellate>1</tessellate>
						<altitudeMode>relativeToGround</altitudeMode>
						<coordinates>						176.8444661706823,37.00913043680084,4434811.498642482						 						175.47254699818788,37.011893230458895,4378991.388633527						</coordinates>
					</LineString>
				</Placemark>
				<Placemark>
					<TimeSpan>
						<begin>2014-07-17</begin>
						<end></end>
					</TimeSpan>
					<styleUrl>branch_style1</styleUrl>
					<LineString>
						<tessellate>1</tessellate>
						<altitudeMode>relativeToGround</altitudeMode>
						<coordinates>						175.47254699818788,37.011893230458895,4378991.388633527						 						174.10075131612996,37.01487995863458,4319321.615865333						</coordinates>
					</LineString>
				</Placemark>
				<Placemark>
					<TimeSpan>
						<begin>2014-07-18</begin>
						<end></end>
					</TimeSpan>
					<styleUrl>branch_style1</styleUrl>
					<LineString>
						<tessellate>1</tessellate>
						<altitudeMode>relativeToGround</altitudeMode>
						<coordinates>						174.10075131612996,37.01487995863458,4319321.615865333						 						172.72908329133213,37.01809715621684,4255802.180337904						</coordinates>
					</LineString>
				</Placemark>
				<Placemark>
					<TimeSpan>
						<begin>2014-07-20</begin>
						<end></end>
					</TimeSpan>
					<styleUrl>branch_style1</styleUrl>
					<LineString>
						<tessellate>1</tessellate>
						<altitudeMode>relativeToGround</altitudeMode>
						<coordinates>						172.72908329133213,37.01809715621684,4255802.180337904						 						171.3575472219483,37.02155175524718,4188433.0820512343						</coordinates>
					</LineString>
				</Placemark>
				<Placemark>
					<TimeSpan>
						<begin>2014-07-21</begin>
						<end></end>
					</TimeSpan>
					<styleUrl>branch_style1</styleUrl>
					<LineString>
						<tessellate>1</tessellate>
						<altitudeMode>relativeToGround</altitudeMode>
						<coordinates>						171.3575472219483,37.02155175524718,4188433.0820512343						 						169.98614754608587,37.02525112218276,4117214.3210053258						</coordinates>
					</LineString>
				</Placemark>
				<Placemark>
					<TimeSpan>
						<begin>2014-07-22</begin>
						<end></end>
					</TimeSpan>
					<styleUrl>branch_style1</styleUrl>
					<LineString>
						<tessellate>1</tessellate>
						<altitudeMode>relativeToGround</altitudeMode>
						<coordinates>						169.98614754608587,37.02525112218276,4117214.3210053258						 						168.6148888512951,37.029203099969465,4042145.8972001784						</coordinates>
					</LineString>
				</Placemark>
				<Placemark>
					<TimeSpan>
						<begin>2014-07-23</begin>
						<end></end>
					</TimeSpan>
					<styleUrl>branch_style1</styleUrl>
					<LineString>
						<tessellate>1</tessellate>
						<altitudeMode>relativeToGround</altitudeMode>
						<coordinates>						168.6148888512951,37.029203099969465,4042145.8972001784						 						167.24377588504308,37.033416055726654,3963227.810635794						</coordinates>
					</LineString>
				</Placemark>
				<Placemark>
					<TimeSpan>
						<begin>2014-07-25</begin>
						<end></end>
					</TimeSpan>
					<styleUrl>branch_style1</styleUrl>
					<LineString>
						<tessellate>1</tessellate>
						<altitudeMode>relativeToGround</altitudeMode>
						<coordinates>						167.24377588504308,37.033416055726654,3963227.810635794						 						165.87281356631473,37.03789893501128,3880460.0613121726						</coordinates>
					</LineString>
				</Placemark>
				<Placemark>
					<TimeSpan>
						<begin>2014-07-26</begin>
						<end></end>
					</TimeSpan>
					<styleUrl>branch_style1</styleUrl>
					<LineString>
						<tessellate>1</tessellate>
						<altitudeMode>relativeToGround</altitudeMode>
						<coordinates>						165.87281356631473,37.03789893501128,3880460.0613121726						 						164.50200699850637,37.04266132383658,3793842.6492293123						</coordinates>
					</LineString>
				</Placemark>
				<Placemark>
					<TimeSpan>
						<begin>2014-07-27</begin>
						<end></end>
					</TimeSpan>
					<styleUrl>branch_style1</styleUrl>
					<LineString>
						<tessellate>1</tessellate>
						<altitudeMode>relativeToGround</altitudeMode>
						<coordinates>						164.50200699850637,37.04266132383658,3793842.6492293123						 						163.13136148381452,37.047713519881626,3703375.5743872114						</coordinates>
					</LineString>
				</Placemark>
				<Placemark>
					<TimeSpan>
						<begin>2014-07-28</begin>
						<end></end>
					</TimeSpan>
					<styleUrl>branch_style1</styleUrl>
					<LineString>
						<tessellate>1</tessellate>
						<altitudeMode>relativeToGround</altitudeMode>
						<coordinates>						163.13136148381452,37.047713519881626,3703375.5743872114						 						161.76088253935683,37.05306661465932,3609058.8367858734						</coordinates>
					</LineString>
				</Placemark>
				<Placemark>
					<TimeSpan>
						<begin>2014-07-30</begin>
						<end></end>
					</TimeSpan>
					<styleUrl>branch_style1</styleUrl>
					<LineString>
						<tessellate>1</tessellate>
						<altitudeMode>relativeToGround</altitudeMode>
						<coordinates>						161.76088253935683,37.05306661465932,3609058.8367858734						 						160.39057591531642,37.058732588835284,3510892.4364252985						</coordinates>
					</LineString>
				</Placemark>
				<Placemark>
					<TimeSpan>
						<begin>2014-07-31</begin>
						<end></end>
					</TimeSpan>
					<styleUrl>branch_style1</styleUrl>
					<LineString>
						<tessellate>1</tessellate>
						<altitudeMode>relativeToGround</altitudeMode>
						<coordinates>						160.39057591531642,37.058732588835284,3510892.4364252985						 						159.02044761546242,37.06472442343727,3408876.373305483						</coordinates>
					</LineString>
				</Placemark>
				<Placemark>
					<TimeSpan>
						<begin>2014-08-01</begin>
						<end></end>
					</TimeSpan>
					<styleUrl>branch_style1</styleUrl>
					<LineString>
						<tessellate>1</tessellate>
						<altitudeMode>relativeToGround</altitudeMode>
						<coordinates>						159.02044761546242,37.06472442343727,3408876.373305483						 						157.65050392048082,37.07105623041073,3303010.647426434						</coordinates>
					</LineString>
				</Placemark>
				<Placemark>
					<TimeSpan>
						<begin>2014-08-02</begin>
						<end></end>
					</TimeSpan>
					<styleUrl>branch_style1</styleUrl>
					<LineString>
						<tessellate>1</tessellate>
						<altitudeMode>relativeToGround</altitudeMode>
						<coordinates>						157.65050392048082,37.07105623041073,3303010.647426434						 						156.28075141465047,37.07774340691738,3193295.2587881424						</coordinates>
					</LineString>
				</Placemark>
				<Placemark>
					<TimeSpan>
						<begin>2014-08-04</begin>
						<end></end>
					</TimeSpan>
					<styleUrl>branch_style1</styleUrl>
					<LineString>
						<tessellate>1</tessellate>
						<altitudeMode>relativeToGround</altitudeMode>
						<coordinates>						156.28075141465047,37.07774340691738,3193295.2587881424						 						154.91119701653827,37.084802819031104,3079730.207390612						</coordinates>
					</LineString>
				</Placemark>
				<Placemark>
					<TimeSpan>
						<begin>2014-08-05</begin>
						<end></end>
					</TimeSpan>
					<styleUrl>branch_style1</styleUrl>
					<LineString>
						<tessellate>1</tessellate>
						<altitudeMode>relativeToGround</altitudeMode>
						<coordinates>						154.91119701653827,37.084802819031104,3079730.207390612						 						153.5418480145596,37.09225302218114,2962315.4932338446						</coordinates>
					</LineString>
				</Placemark>
				<Placemark>
					<TimeSpan>
						<begin>2014-08-06</begin>
						<end></end>
					</TimeSpan>
					<styleUrl>branch_style1</styleUrl>
					<LineString>
						<tessellate>1</tessellate>
						<altitudeMode>relativeToGround</altitudeMode>
						<coordinates>						153.5418480145596,37.09225302218114,2962315.4932338446						 						152.17271210848816,37.100114528014224,2841051.1163178403						</coordinates>
					</LineString>
				</Placemark>
				<Placemark>
					<TimeSpan>
						<begin>2014-08-07</begin>
						<end></end>
					</TimeSpan>
					<styleUrl>branch_style1</styleUrl>
					<LineString>
						<tessellate>1</tessellate>
						<altitudeMode>relativeToGround</altitudeMode>
						<coordinates>						152.17271210848816,37.100114528014224,2841051.1163178403						 						150.80379745831854,37.10841013057112,2715937.076642597						</coordinates>
					</LineString>
				</Placemark>
				<Placemark>
					<TimeSpan>
						<begin>2014-08-09</begin>
						<end></end>
					</TimeSpan>
					<styleUrl>branch_style1</styleUrl>
					<LineString>
						<tessellate>1</tessellate>
						<altitudeMode>relativeToGround</altitudeMode>
						<coordinates>						150.80379745831854,37.10841013057112,2715937.076642597						 						149.4351127423208,37.117165309224816,2586973.374208115						</coordinates>
					</LineString>
				</Placemark>
				<Placemark>
					<TimeSpan>
						<begin>2014-08-10</begin>
						<end></end>
					</TimeSpan>
					<styleUrl>branch_style1</styleUrl>
					<LineString>
						<tessellate>1</tessellate>
						<altitudeMode>relativeToGround</altitudeMode>
						<coordinates>						149.4351127423208,37.117165309224816,2586973.374208115						 						148.0666672267372,37.12640873237061,2454160.009014396						</coordinates>
					</LineString>
				</Placemark>
				<Placemark>
					<TimeSpan>
						<begin>2014-08-11</begin>
						<end></end>
					</TimeSpan>
					<styleUrl>branch_style1</styleUrl>
					<LineString>
						<tessellate>1</tessellate>
						<altitudeMode>relativeToGround</altitudeMode>
						<coordinates>						148.0666672267372,37.12640873237061,2454160.009014396						 						146.69847085044728,37.13617289545493,2317496.9810614362						</coordinates>
					</LineString>
				</Placemark>
				<Placemark>
					<TimeSpan>
						<begin>2014-08-12</begin>
						<end></end>
					</TimeSpan>
					<styleUrl>branch_style1</styleUrl>
					<LineString>
						<tessellate>1</tessellate>
						<altitudeMode>relativeToGround</altitudeMode>
						<coordinates>						146.69847085044728,37.13617289545493,2317496.9810614362						 						145.33053432918985,37.14649494132495,2176984.2903492395						</coordinates>
					</LineString>
				</Placemark>
				<Placemark>
					<TimeSpan>
						<begin>2014-08-14</begin>
						<end></end>
					</TimeSpan>
					<styleUrl>branch_style1</styleUrl>
					<LineString>
						<tessellate>1</tessellate>
						<altitudeMode>relativeToGround</altitudeMode>
						<coordinates>						145.33053432918985,37.14649494132495,2176984.2903492395						 						143.96286928583072,37.15741773302684,2032621.9368778039						</coordinates>
					</LineString>
				</Placemark>
				<Placemark>
					<TimeSpan>
						<begin>2014-08-15</begin>
						<end></end>
					</TimeSpan>
					<styleUrl>branch_style1</styleUrl>
					<LineString>
						<tessellate>1</tessellate>
						<altitudeMode>relativeToGround</altitudeMode>
						<coordinates>						143.96286928583072,37.15741773302684,2032621.9368778039						 						142.5954884160742,37.16899128424646,1884409.9206471313						</coordinates>
					</LineString>
				</Placemark>
				<Placemark>
					<TimeSpan>
						<begin>2014-08-16</begin>
						<end></end>
					</TimeSpan>
					<styleUrl>branch_style1</styleUrl>
					<LineString>
						<tessellate>1</tessellate>
						<altitudeMode>relativeToGround</altitudeMode>
						<coordinates>						142.5954884160742,37.16899128424646,1884409.9206471313						 						141.22840570362794,37.181274709965955,1732348.241657218						</coordinates>
					</LineString>
				</Placemark>
				<Placemark>
					<TimeSpan>
						<begin>2014-08-17</begin>
						<end></end>
					</TimeSpan>
					<styleUrl>branch_style1</styleUrl>
					<LineString>
						<tessellate>1</tessellate>
						<altitudeMode>relativeToGround</altitudeMode>
						<coordinates>						141.22840570362794,37.181274709965955,1732348.241657218						 						139.861636706436,37.19433895745539,1576436.8999080732						</coordinates>
					</LineString>
				</Placemark>
				<Placemark>
					<TimeSpan>
						<begin>2014-08-19</begin>
						<end></end>
					</TimeSpan>
					<styleUrl>branch_style1</styleUrl>
					<LineString>
						<tessellate>1</tessellate>
						<altitudeMode>relativeToGround</altitudeMode>
						<coordinates>						139.861636706436,37.19433895745539,1576436.8999080732						 						138.49519894866972,37.20827075113539,1416675.895399684						</coordinates>
					</LineString>
				</Placemark>
				<Placemark>
					<TimeSpan>
						<begin>2014-08-20</begin>
						<end></end>
					</TimeSpan>
					<styleUrl>branch_style1</styleUrl>
					<LineString>
						<tessellate>1</tessellate>
						<altitudeMode>relativeToGround</altitudeMode>
						<coordinates>						138.49519894866972,37.20827075113539,1416675.895399684						 						137.12911247689706,37.22317851000063,1253065.228132058						</coordinates>
					</LineString>
				</Placemark>
				<Placemark>
					<TimeSpan>
						<begin>2014-08-21</begin>
						<end></end>
					</TimeSpan>
					<styleUrl>branch_style1</styleUrl>
					<LineString>
						<tessellate>1</tessellate>
						<altitudeMode>relativeToGround</altitudeMode>
						<coordinates>						137.12911247689706,37.22317851000063,1253065.228132058						 						135.7634006847485,37.23920164660387,1085604.898105193						</coordinates>
					</LineString>
				</Placemark>
				<Placemark>
					<TimeSpan>
						<begin>2014-08-22</begin>
						<end></end>
					</TimeSpan>
					<styleUrl>branch_style1</styleUrl>
					<LineString>
						<tessellate>1</tessellate>
						<altitudeMode>relativeToGround</altitudeMode>
						<coordinates>						135.7634006847485,37.23920164660387,1085604.898105193						 						134.3980916065218,37.25652606559586,914294.9053190909						</coordinates>
					</LineString>
				</Placemark>
				<Placemark>
					<TimeSpan>
						<begin>2014-08-24</begin>
						<end></end>
					</TimeSpan>
					<styleUrl>branch_style1</styleUrl>
					<LineString>
						<tessellate>1</tessellate>
						<altitudeMode>relativeToGround</altitudeMode>
						<coordinates>						134.3980916065218,37.25652606559586,914294.9053190909						 						133.03322010314955,37.275412061385076,739135.2497737482						</coordinates>
					</LineString>
				</Placemark>
				<Placemark>
					<TimeSpan>
						<begin>2014-08-25</begin>
						<end></end>
					</TimeSpan>
					<styleUrl>branch_style1</styleUrl>
					<LineString>
						<tessellate>1</tessellate>
						<altitudeMode>relativeToGround</altitudeMode>
						<coordinates>						133.03322010314955,37.275412061385076,739135.2497737482						 						131.66883195650797,37.296250113691436,560125.9314691685						</coordinates>
					</LineString>
				</Placemark>
				<Placemark>
					<TimeSpan>
						<begin>2014-08-26</begin>
						<end></end>
					</TimeSpan>
					<styleUrl>branch_style1</styleUrl>
					<LineString>
						<tessellate>1</tessellate>
						<altitudeMode>relativeToGround</altitudeMode>
						<coordinates>						131.66883195650797,37.296250113691436,560125.9314691685						 						130.30499279714078,37.31969107666547,377266.9504053518						</coordinates>
					</LineString>
				</Placemark>
				<Placemark>
					<TimeSpan>
						<begin>2014-08-27</begin>
						<end></end>
					</TimeSpan>
					<styleUrl>branch_style1</styleUrl>
					<LineString>
						<tessellate>1</tessellate>
						<altitudeMode>relativeToGround</altitudeMode>
						<coordinates>						130.30499279714078,37.31969107666547,377266.9504053518						 						128.94181309845496,37.347036740379686,190558.3065822944						</coordinates>
					</LineString>
				</Placemark>
				<Placemark>
					<TimeSpan>
						<begin>2014-08-29</begin>
						<end></end>
					</TimeSpan>
					<styleUrl>branch_style1</styleUrl>
					<LineString>
						<tessellate>1</tessellate>
						<altitudeMode>relativeToGround</altitudeMode>
						<coordinates>						128.94181309845496,37.347036740379686,190558.3065822944						 						127.58000183105469,37.38999938964844,0.0						</coordinates>
					</LineString>
				</Placemark>
			</Folder>
			<Folder>
				<name>China:US</name>
				<Placemark>
					<TimeSpan>
						<begin>2010-07-25</begin>
						<end></end>
					</TimeSpan>
					<styleUrl>branch_style2</styleUrl>
					<LineString>
						<tessellate>1</tessellate>
						<altitudeMode>relativeToGround</altitudeMode>
						<coordinates>						104.11000061035156,35.5099983215332,0.0						 						105.73268620920861,35.51586450388035,225915.5964053807						</coordinates>
					</LineString>
				</Placemark>
				<Placemark>
					<TimeSpan>
						<begin>2010-08-04</begin>
						<end></end>
					</TimeSpan>
					<styleUrl>branch_style2</styleUrl>
					<LineString>
						<tessellate>1</tessellate>
						<altitudeMode>relativeToGround</altitudeMode>
						<coordinates>						105.73268620920861,35.51586450388035,225915.5964053807						 						107.3551546531485,35.5218366819419,447267.24136822845						</coordinates>
					</LineString>
				</Placemark>
				<Placemark>
					<TimeSpan>
						<begin>2010-08-14</begin>
						<end></end>
					</TimeSpan>
					<styleUrl>branch_style2</styleUrl>
					<LineString>
						<tessellate>1</tessellate>
						<altitudeMode>relativeToGround</altitudeMode>
						<coordinates>						107.3551546531485,35.5218366819419,447267.24136822845						 						108.97740385003391,35.52791591269813,664054.9348885432						</coordinates>
					</LineString>
				</Placemark>
				<Placemark>
					<TimeSpan>
						<begin>2010-08-24</begin>
						<end></end>
					</TimeSpan>
					<styleUrl>branch_style2</styleUrl>
					<LineString>
						<tessellate>1</tessellate>
						<altitudeMode>relativeToGround</altitudeMode>
						<coordinates>						108.97740385003391,35.52791591269813,664054.9348885432						 						110.59943168418572,35.53410327521435,876278.6769663251						</coordinates>
					</LineString>
				</Placemark>
				<Placemark>
					<TimeSpan>
						<begin>2010-09-02</begin>
						<end></end>
					</TimeSpan>
					<styleUrl>branch_style2</styleUrl>
					<LineString>
						<tessellate>1</tessellate>
						<altitudeMode>relativeToGround</altitudeMode>
						<coordinates>						110.59943168418572,35.53410327521435,876278.6769663251						 						112.22123601585936,35.54039987133312,1083938.467601574						</coordinates>
					</LineString>
				</Placemark>
				<Placemark>
					<TimeSpan>
						<begin>2010-09-12</begin>
						<end></end>
					</TimeSpan>
					<styleUrl>branch_style2</styleUrl>
					<LineString>
						<tessellate>1</tessellate>
						<altitudeMode>relativeToGround</altitudeMode>
						<coordinates>						112.22123601585936,35.54039987133312,1083938.467601574						 						113.84281468070519,35.5468068263956,1287034.30679429						</coordinates>
					</LineString>
				</Placemark>
				<Placemark>
					<TimeSpan>
						<begin>2010-09-22</begin>
						<end></end>
					</TimeSpan>
					<styleUrl>branch_style2</styleUrl>
					<LineString>
						<tessellate>1</tessellate>
						<altitudeMode>relativeToGround</altitudeMode>
						<coordinates>						113.84281468070519,35.5468068263956,1287034.30679429						 						115.46416548921083,35.55332528999375,1485566.194544473						</coordinates>
					</LineString>
				</Placemark>
				<Placemark>
					<TimeSpan>
						<begin>2010-10-02</begin>
						<end></end>
					</TimeSpan>
					<styleUrl>branch_style2</styleUrl>
					<LineString>
						<tessellate>1</tessellate>
						<altitudeMode>relativeToGround</altitudeMode>
						<coordinates>						115.46416548921083,35.55332528999375,1485566.194544473						 						117.08528622612596,35.5599564367548,1679534.1308521233						</coordinates>
					</LineString>
				</Placemark>
				<Placemark>
					<TimeSpan>
						<begin>2010-10-12</begin>
						<end></end>
					</TimeSpan>
					<styleUrl>branch_style2</styleUrl>
					<LineString>
						<tessellate>1</tessellate>
						<altitudeMode>relativeToGround</altitudeMode>
						<coordinates>						117.08528622612596,35.5599564367548,1679534.1308521233						 						118.7061746498675,35.56670146715997,1868938.1157172404						</coordinates>
					</LineString>
				</Placemark>
				<Placemark>
					<TimeSpan>
						<begin>2010-10-21</begin>
						<end></end>
					</TimeSpan>
					<styleUrl>branch_style2</styleUrl>
					<LineString>
						<tessellate>1</tessellate>
						<altitudeMode>relativeToGround</altitudeMode>
						<coordinates>						118.7061746498675,35.56670146715997,1868938.1157172404						 						120.32682849190577,35.5735616083991,2053778.1491398246						</coordinates>
					</LineString>
				</Placemark>
				<Placemark>
					<TimeSpan>
						<begin>2010-10-31</begin>
						<end></end>
					</TimeSpan>
					<styleUrl>branch_style2</styleUrl>
					<LineString>
						<tessellate>1</tessellate>
						<altitudeMode>relativeToGround</altitudeMode>
						<coordinates>						120.32682849190577,35.5735616083991,2053778.1491398246						 						121.94724545612927,35.58053811526351,2234054.231119876						</coordinates>
					</LineString>
				</Placemark>
				<Placemark>
					<TimeSpan>
						<begin>2010-11-10</begin>
						<end></end>
					</TimeSpan>
					<styleUrl>branch_style2</styleUrl>
					<LineString>
						<tessellate>1</tessellate>
						<altitudeMode>relativeToGround</altitudeMode>
						<coordinates>						121.94724545612927,35.58053811526351,2234054.231119876						 						123.56742321818788,35.58763227107875,2409766.361657394						</coordinates>
					</LineString>
				</Placemark>
				<Placemark>
					<TimeSpan>
						<begin>2010-11-20</begin>
						<end></end>
					</TimeSpan>
					<styleUrl>branch_style2</styleUrl>
					<LineString>
						<tessellate>1</tessellate>
						<altitudeMode>relativeToGround</altitudeMode>
						<coordinates>						123.56742321818788,35.58763227107875,2409766.361657394						 						125.18735942481418,35.59484538868009,2580914.5407523797						</coordinates>
					</LineString>
				</Placemark>
				<Placemark>
					<TimeSpan>
						<begin>2010-11-30</begin>
						<end></end>
					</TimeSpan>
					<styleUrl>branch_style2</styleUrl>
					<LineString>
						<tessellate>1</tessellate>
						<altitudeMode>relativeToGround</altitudeMode>
						<coordinates>						125.18735942481418,35.59484538868009,2580914.5407523797						 						126.80705169312017,35.60217881143274,2747498.7684048316						</coordinates>
					</LineString>
				</Placemark>
				<Placemark>
					<TimeSpan>
						<begin>2010-12-09</begin>
						<end></end>
					</TimeSpan>
					<styleUrl>branch_style2</styleUrl>
					<LineString>
						<tessellate>1</tessellate>
						<altitudeMode>relativeToGround</altitudeMode>
						<coordinates>						126.80705169312017,35.60217881143274,2747498.7684048316						 						128.42649760986984,35.609633914299565,2909519.0446147514						</coordinates>
					</LineString>
				</Placemark>
				<Placemark>
					<TimeSpan>
						<begin>2010-12-19</begin>
						<end></end>
					</TimeSpan>
					<styleUrl>branch_style2</styleUrl>
					<LineString>
						<tessellate>1</tessellate>
						<altitudeMode>relativeToGround</altitudeMode>
						<coordinates>						128.42649760986984,35.609633914299565,2909519.0446147514						 						130.0456947307254,35.61721210495919,3066975.369382138						</coordinates>
					</LineString>
				</Placemark>
				<Placemark>
					<TimeSpan>
						<begin>2010-12-29</begin>
						<end></end>
					</TimeSpan>
					<styleUrl>branch_style2</styleUrl>
					<LineString>
						<tessellate>1</tessellate>
						<altitudeMode>relativeToGround</altitudeMode>
						<coordinates>						130.0456947307254,35.61721210495919,3066975.369382138						 						131.6646405794664,35.62491482497739,3219867.7427069913						</coordinates>
					</LineString>
				</Placemark>
				<Placemark>
					<TimeSpan>
						<begin>2011-01-08</begin>
						<end></end>
					</TimeSpan>
					<styleUrl>branch_style2</styleUrl>
					<LineString>
						<tessellate>1</tessellate>
						<altitudeMode>relativeToGround</altitudeMode>
						<coordinates>						131.6646405794664,35.62491482497739,3219867.7427069913						 						133.28333264718069,35.63274355103497,3368196.1645893124						</coordinates>
					</LineString>
				</Placemark>
				<Placemark>
					<TimeSpan>
						<begin>2011-01-17</begin>
						<end></end>
					</TimeSpan>
					<styleUrl>branch_style2</styleUrl>
					<LineString>
						<tessellate>1</tessellate>
						<altitudeMode>relativeToGround</altitudeMode>
						<coordinates>						133.28333264718069,35.63274355103497,3368196.1645893124						 						134.90176839142472,35.640699796215564,3511960.6350291						</coordinates>
					</LineString>
				</Placemark>
				<Placemark>
					<TimeSpan>
						<begin>2011-01-27</begin>
						<end></end>
					</TimeSpan>
					<styleUrl>branch_style2</styleUrl>
					<LineString>
						<tessellate>1</tessellate>
						<altitudeMode>relativeToGround</altitudeMode>
						<coordinates>						134.90176839142472,35.640699796215564,3511960.6350291						 						136.51994523535313,35.648785111357185,3651161.1540263547						</coordinates>
					</LineString>
				</Placemark>
				<Placemark>
					<TimeSpan>
						<begin>2011-02-06</begin>
						<end></end>
					</TimeSpan>
					<styleUrl>branch_style2</styleUrl>
					<LineString>
						<tessellate>1</tessellate>
						<altitudeMode>relativeToGround</altitudeMode>
						<coordinates>						136.51994523535313,35.648785111357185,3651161.1540263547						 						138.13786056681457,35.65700108647139,3785797.7215810763						</coordinates>
					</LineString>
				</Placemark>
				<Placemark>
					<TimeSpan>
						<begin>2011-02-16</begin>
						<end></end>
					</TimeSpan>
					<styleUrl>branch_style2</styleUrl>
					<LineString>
						<tessellate>1</tessellate>
						<altitudeMode>relativeToGround</altitudeMode>
						<coordinates>						138.13786056681457,35.65700108647139,3785797.7215810763						 						139.75551173741363,35.665349352234344,3915870.337693265						</coordinates>
					</LineString>
				</Placemark>
				<Placemark>
					<TimeSpan>
						<begin>2011-02-26</begin>
						<end></end>
					</TimeSpan>
					<styleUrl>branch_style2</styleUrl>
					<LineString>
						<tessellate>1</tessellate>
						<altitudeMode>relativeToGround</altitudeMode>
						<coordinates>						139.75551173741363,35.665349352234344,3915870.337693265						 						141.3728960615353,35.67383158155448,4041379.0023629214						</coordinates>
					</LineString>
				</Placemark>
				<Placemark>
					<TimeSpan>
						<begin>2011-03-07</begin>
						<end></end>
					</TimeSpan>
					<styleUrl>branch_style2</styleUrl>
					<LineString>
						<tessellate>1</tessellate>
						<altitudeMode>relativeToGround</altitudeMode>
						<coordinates>						141.3728960615353,35.67383158155448,4041379.0023629214						 						142.99001081533189,35.68244949122164,4162323.715590044						</coordinates>
					</LineString>
				</Placemark>
				<Placemark>
					<TimeSpan>
						<begin>2011-03-17</begin>
						<end></end>
					</TimeSpan>
					<styleUrl>branch_style2</styleUrl>
					<LineString>
						<tessellate>1</tessellate>
						<altitudeMode>relativeToGround</altitudeMode>
						<coordinates>						142.99001081533189,35.68244949122164,4162323.715590044						 						144.6068532356689,35.69120484364313,4278704.477374634						</coordinates>
					</LineString>
				</Placemark>
				<Placemark>
					<TimeSpan>
						<begin>2011-03-27</begin>
						<end></end>
					</TimeSpan>
					<styleUrl>branch_style2</styleUrl>
					<LineString>
						<tessellate>1</tessellate>
						<altitudeMode>relativeToGround</altitudeMode>
						<coordinates>						144.6068532356689,35.69120484364313,4278704.477374634						 						146.22342051902822,35.700099448672425,4390521.287716691						</coordinates>
					</LineString>
				</Placemark>
				<Placemark>
					<TimeSpan>
						<begin>2011-04-06</begin>
						<end></end>
					</TimeSpan>
					<styleUrl>branch_style2</styleUrl>
					<LineString>
						<tessellate>1</tessellate>
						<altitudeMode>relativeToGround</altitudeMode>
						<coordinates>						146.22342051902822,35.700099448672425,4390521.287716691						 						147.83970982036644,35.709135165536864,4497774.146616216						</coordinates>
					</LineString>
				</Placemark>
				<Placemark>
					<TimeSpan>
						<begin>2011-04-16</begin>
						<end></end>
					</TimeSpan>
					<styleUrl>branch_style2</styleUrl>
					<LineString>
						<tessellate>1</tessellate>
						<altitudeMode>relativeToGround</altitudeMode>
						<coordinates>						147.83970982036644,35.709135165536864,4497774.146616216						 						149.45571825192567,35.71831390487103,4600463.054073207						</coordinates>
					</LineString>
				</Placemark>
				<Placemark>
					<TimeSpan>
						<begin>2011-04-25</begin>
						<end></end>
					</TimeSpan>
					<styleUrl>branch_style2</styleUrl>
					<LineString>
						<tessellate>1</tessellate>
						<altitudeMode>relativeToGround</altitudeMode>
						<coordinates>						149.45571825192567,35.71831390487103,4600463.054073207						 						151.07144288199405,35.727637630863235,4698588.010087665						</coordinates>
					</LineString>
				</Placemark>
				<Placemark>
					<TimeSpan>
						<begin>2011-05-05</begin>
						<end></end>
					</TimeSpan>
					<styleUrl>branch_style2</styleUrl>
					<LineString>
						<tessellate>1</tessellate>
						<altitudeMode>relativeToGround</altitudeMode>
						<coordinates>						151.07144288199405,35.727637630863235,4698588.010087665						 						152.6868807336131,35.73710836352304,4792149.014659591						</coordinates>
					</LineString>
				</Placemark>
				<Placemark>
					<TimeSpan>
						<begin>2011-05-15</begin>
						<end></end>
					</TimeSpan>
					<styleUrl>branch_style2</styleUrl>
					<LineString>
						<tessellate>1</tessellate>
						<altitudeMode>relativeToGround</altitudeMode>
						<coordinates>						152.6868807336131,35.73710836352304,4792149.014659591						 						154.3020287832291,35.74672818107847,4881146.067788983						</coordinates>
					</LineString>
				</Placemark>
				<Placemark>
					<TimeSpan>
						<begin>2011-05-25</begin>
						<end></end>
					</TimeSpan>
					<styleUrl>branch_style2</styleUrl>
					<LineString>
						<tessellate>1</tessellate>
						<altitudeMode>relativeToGround</altitudeMode>
						<coordinates>						154.3020287832291,35.74672818107847,4881146.067788983						 						155.91688395928512,35.75649922251228,4965579.169475842						</coordinates>
					</LineString>
				</Placemark>
				<Placemark>
					<TimeSpan>
						<begin>2011-06-04</begin>
						<end></end>
					</TimeSpan>
					<styleUrl>branch_style2</styleUrl>
					<LineString>
						<tessellate>1</tessellate>
						<altitudeMode>relativeToGround</altitudeMode>
						<coordinates>						155.91688395928512,35.75649922251228,4965579.169475842						 						157.53144314074922,35.76642369024768,5045448.3197201695						</coordinates>
					</LineString>
				</Placemark>
				<Placemark>
					<TimeSpan>
						<begin>2011-06-13</begin>
						<end></end>
					</TimeSpan>
					<styleUrl>branch_style2</styleUrl>
					<LineString>
						<tessellate>1</tessellate>
						<altitudeMode>relativeToGround</altitudeMode>
						<coordinates>						157.53144314074922,35.76642369024768,5045448.3197201695						 						159.1457031555771,35.776503852994395,5120753.518521962						</coordinates>
					</LineString>
				</Placemark>
				<Placemark>
					<TimeSpan>
						<begin>2011-06-23</begin>
						<end></end>
					</TimeSpan>
					<styleUrl>branch_style2</styleUrl>
					<LineString>
						<tessellate>1</tessellate>
						<altitudeMode>relativeToGround</altitudeMode>
						<coordinates>						159.1457031555771,35.776503852994395,5120753.518521962						 						160.75966077910272,35.78674204876742,5191494.765881223						</coordinates>
					</LineString>
				</Placemark>
				<Placemark>
					<TimeSpan>
						<begin>2011-07-03</begin>
						<end></end>
					</TimeSpan>
					<styleUrl>branch_style2</styleUrl>
					<LineString>
						<tessellate>1</tessellate>
						<altitudeMode>relativeToGround</altitudeMode>
						<coordinates>						160.75966077910272,35.78674204876742,5191494.765881223						 						162.373312732354,35.79714068809177,5257672.06179795						</coordinates>
					</LineString>
				</Placemark>
				<Placemark>
					<TimeSpan>
						<begin>2011-07-13</begin>
						<end></end>
					</TimeSpan>
					<styleUrl>branch_style2</styleUrl>
					<LineString>
						<tessellate>1</tessellate>
						<altitudeMode>relativeToGround</altitudeMode>
						<coordinates>						162.373312732354,35.79714068809177,5257672.06179795						 						163.98665568028835,35.80770225740761,5319285.406272145						</coordinates>
					</LineString>
				</Placemark>
				<Placemark>
					<TimeSpan>
						<begin>2011-07-23</begin>
						<end></end>
					</TimeSpan>
					<styleUrl>branch_style2</styleUrl>
					<LineString>
						<tessellate>1</tessellate>
						<altitudeMode>relativeToGround</altitudeMode>
						<coordinates>						163.98665568028835,35.80770225740761,5319285.406272145						 						165.5996862299423,35.81842932269177,5376334.799303807						</coordinates>
					</LineString>
				</Placemark>
				<Placemark>
					<TimeSpan>
						<begin>2011-08-01</begin>
						<end></end>
					</TimeSpan>
					<styleUrl>branch_style2</styleUrl>
					<LineString>
						<tessellate>1</tessellate>
						<altitudeMode>relativeToGround</altitudeMode>
						<coordinates>						165.5996862299423,35.81842932269177,5376334.799303807						 						167.21240092849118,35.82932453331324,5428820.240892936						</coordinates>
					</LineString>
				</Placemark>
				<Placemark>
					<TimeSpan>
						<begin>2011-08-11</begin>
						<end></end>
					</TimeSpan>
					<styleUrl>branch_style2</styleUrl>
					<LineString>
						<tessellate>1</tessellate>
						<altitudeMode>relativeToGround</altitudeMode>
						<coordinates>						167.21240092849118,35.82932453331324,5428820.240892936						 						168.8247962612108,35.84039062614145,5476741.731039532						</coordinates>
					</LineString>
				</Placemark>
				<Placemark>
					<TimeSpan>
						<begin>2011-08-21</begin>
						<end></end>
					</TimeSpan>
					<styleUrl>branch_style2</styleUrl>
					<LineString>
						<tessellate>1</tessellate>
						<altitudeMode>relativeToGround</altitudeMode>
						<coordinates>						168.8247962612108,35.84039062614145,5476741.731039532						 						170.43686864933574,35.85163042992888,5520099.269743595						</coordinates>
					</LineString>
				</Placemark>
				<Placemark>
					<TimeSpan>
						<begin>2011-08-31</begin>
						<end></end>
					</TimeSpan>
					<styleUrl>branch_style2</styleUrl>
					<LineString>
						<tessellate>1</tessellate>
						<altitudeMode>relativeToGround</altitudeMode>
						<coordinates>						170.43686864933574,35.85163042992888,5520099.269743595						 						172.04861444780713,35.86304686999092,5558892.857005124						</coordinates>
					</LineString>
				</Placemark>
				<Placemark>
					<TimeSpan>
						<begin>2011-09-09</begin>
						<end></end>
					</TimeSpan>
					<styleUrl>branch_style2</styleUrl>
					<LineString>
						<tessellate>1</tessellate>
						<altitudeMode>relativeToGround</altitudeMode>
						<coordinates>						172.04861444780713,35.86304686999092,5558892.857005124						 						173.6600299429015,35.87464297320873,5593122.492824121						</coordinates>
					</LineString>
				</Placemark>
				<Placemark>
					<TimeSpan>
						<begin>2011-09-19</begin>
						<end></end>
					</TimeSpan>
					<styleUrl>branch_style2</styleUrl>
					<LineString>
						<tessellate>1</tessellate>
						<altitudeMode>relativeToGround</altitudeMode>
						<coordinates>						173.6600299429015,35.87464297320873,5593122.492824121						 						175.27111134973273,35.88642187338352,5622788.177200586						</coordinates>
					</LineString>
				</Placemark>
				<Placemark>
					<TimeSpan>
						<begin>2011-09-29</begin>
						<end></end>
					</TimeSpan>
					<styleUrl>branch_style2</styleUrl>
					<LineString>
						<tessellate>1</tessellate>
						<altitudeMode>relativeToGround</altitudeMode>
						<coordinates>						175.27111134973273,35.88642187338352,5622788.177200586						 						176.8818548096174,35.89838681697344,5647889.910134518						</coordinates>
					</LineString>
				</Placemark>
				<Placemark>
					<TimeSpan>
						<begin>2011-10-09</begin>
						<end></end>
					</TimeSpan>
					<styleUrl>branch_style2</styleUrl>
					<LineString>
						<tessellate>1</tessellate>
						<altitudeMode>relativeToGround</altitudeMode>
						<coordinates>						176.8818548096174,35.89838681697344,5647889.910134518						 						178.492256387294,35.91054116924818,5668427.6916259155						</coordinates>
					</LineString>
				</Placemark>
				<Placemark>
					<TimeSpan>
						<begin>2011-10-19</begin>
						<end></end>
					</TimeSpan>
					<styleUrl>branch_style2</styleUrl>
					<LineString>
						<tessellate>1</tessellate>
						<altitudeMode>relativeToGround</altitudeMode>
						<coordinates>						178.492256387294,35.91054116924818,5668427.6916259155						 						-179.89768793201617,35.92288842089958,5684401.521674781						</coordinates>
					</LineString>
				</Placemark>
				<Placemark>
					<TimeSpan>
						<begin>2011-10-28</begin>
						<end></end>
					</TimeSpan>
					<styleUrl>branch_style2</styleUrl>
					<LineString>
						<tessellate>1</tessellate>
						<altitudeMode>relativeToGround</altitudeMode>
						<coordinates>						-179.89768793201617,35.92288842089958,5684401.521674781						 						-178.28798224571653,35.9354321951518,5695811.400281113						</coordinates>
					</LineString>
				</Placemark>
				<Placemark>
					<TimeSpan>
						<begin>2011-11-07</begin>
						<end></end>
					</TimeSpan>
					<styleUrl>branch_style2</styleUrl>
					<LineString>
						<tessellate>1</tessellate>
						<altitudeMode>relativeToGround</altitudeMode>
						<coordinates>						-178.28798224571653,35.9354321951518,5695811.400281113						 						-176.67863073712732,35.94817625541846,5702657.327444912						</coordinates>
					</LineString>
				</Placemark>
				<Placemark>
					<TimeSpan>
						<begin>2011-11-17</begin>
						<end></end>
					</TimeSpan>
					<styleUrl>branch_style2</styleUrl>
					<LineString>
						<tessellate>1</tessellate>
						<altitudeMode>relativeToGround</altitudeMode>
						<coordinates>						-176.67863073712732,35.94817625541846,5702657.327444912						 						-175.06963767897443,35.96112451356108,5704939.303166179						</coordinates>
					</LineString>
				</Placemark>
				<Placemark>
					<TimeSpan>
						<begin>2011-11-27</begin>
						<end></end>
					</TimeSpan>
					<styleUrl>branch_style2</styleUrl>
					<LineString>
						<tessellate>1</tessellate>
						<altitudeMode>relativeToGround</altitudeMode>
						<coordinates>						-175.06963767897443,35.96112451356108,5704939.303166179						 						-173.461007437093,35.9742810388084,5702657.327444913						</coordinates>
					</LineString>
				</Placemark>
				<Placemark>
					<TimeSpan>
						<begin>2011-12-07</begin>
						<end></end>
					</TimeSpan>
					<styleUrl>branch_style2</styleUrl>
					<LineString>
						<tessellate>1</tessellate>
						<altitudeMode>relativeToGround</altitudeMode>
						<coordinates>						-173.461007437093,35.9742810388084,5702657.327444913						 						-171.8527444743625,35.987650067404395,5695811.400281114						</coordinates>
					</LineString>
				</Placemark>
				<Placemark>
					<TimeSpan>
						<begin>2011-12-16</begin>
						<end></end>
					</TimeSpan>
					<styleUrl>branch_style2</styleUrl>
					<LineString>
						<tessellate>1</tessellate>
						<altitudeMode>relativeToGround</altitudeMode>
						<coordinates>						-171.8527444743625,35.987650067404395,5695811.400281114						 						-170.2448533548935,36.00123601306088,5684401.521674781						</coordinates>
					</LineString>
				</Placemark>
				<Placemark>
					<TimeSpan>
						<begin>2011-12-26</begin>
						<end></end>
					</TimeSpan>
					<styleUrl>branch_style2</styleUrl>
					<LineString>
						<tessellate>1</tessellate>
						<altitudeMode>relativeToGround</altitudeMode>
						<coordinates>						-170.2448533548935,36.00123601306088,5684401.521674781						 						-168.63733874848884,36.01504347830007,5668427.691625916						</coordinates>
					</LineString>
				</Placemark>
				<Placemark>
					<TimeSpan>
						<begin>2012-01-05</begin>
						<end></end>
					</TimeSpan>
					<styleUrl>branch_style2</styleUrl>
					<LineString>
						<tessellate>1</tessellate>
						<altitudeMode>relativeToGround</altitudeMode>
						<coordinates>						-168.63733874848884,36.01504347830007,5668427.691625916						 						-167.03020543540237,36.02907726678426,5647889.910134517						</coordinates>
					</LineString>
				</Placemark>
				<Placemark>
					<TimeSpan>
						<begin>2012-01-15</begin>
						<end></end>
					</TimeSpan>
					<styleUrl>branch_style2</styleUrl>
					<LineString>
						<tessellate>1</tessellate>
						<altitudeMode>relativeToGround</altitudeMode>
						<coordinates>						-167.03020543540237,36.02907726678426,5647889.910134517						 						-165.42345831142347,36.04334239674199,5622788.177200586						</coordinates>
					</LineString>
				</Placemark>
				<Placemark>
					<TimeSpan>
						<begin>2012-01-24</begin>
						<end></end>
					</TimeSpan>
					<styleUrl>branch_style2</styleUrl>
					<LineString>
						<tessellate>1</tessellate>
						<altitudeMode>relativeToGround</altitudeMode>
						<coordinates>						-165.42345831142347,36.04334239674199,5622788.177200586						 						-163.81710239331727,36.057844115615616,5593122.492824121						</coordinates>
					</LineString>
				</Placemark>
				<Placemark>
					<TimeSpan>
						<begin>2012-02-03</begin>
						<end></end>
					</TimeSpan>
					<styleUrl>branch_style2</styleUrl>
					<LineString>
						<tessellate>1</tessellate>
						<altitudeMode>relativeToGround</altitudeMode>
						<coordinates>						-163.81710239331727,36.057844115615616,5593122.492824121						 						-162.21114282465527,36.07258791607213,5558892.857005125						</coordinates>
					</LineString>
				</Placemark>
				<Placemark>
					<TimeSpan>
						<begin>2012-02-13</begin>
						<end></end>
					</TimeSpan>
					<styleUrl>branch_style2</styleUrl>
					<LineString>
						<tessellate>1</tessellate>
						<altitudeMode>relativeToGround</altitudeMode>
						<coordinates>						-162.21114282465527,36.07258791607213,5558892.857005125						 						-160.60558488207408,36.08757955353974,5520099.269743595						</coordinates>
					</LineString>
				</Placemark>
				<Placemark>
					<TimeSpan>
						<begin>2012-02-23</begin>
						<end></end>
					</TimeSpan>
					<styleUrl>branch_style2</styleUrl>
					<LineString>
						<tessellate>1</tessellate>
						<altitudeMode>relativeToGround</altitudeMode>
						<coordinates>						-160.60558488207408,36.08757955353974,5520099.269743595						 						-159.00043398200555,36.102825065456294,5476741.731039532						</coordinates>
					</LineString>
				</Placemark>
				<Placemark>
					<TimeSpan>
						<begin>2012-03-04</begin>
						<end></end>
					</TimeSpan>
					<styleUrl>branch_style2</styleUrl>
					<LineString>
						<tessellate>1</tessellate>
						<altitudeMode>relativeToGround</altitudeMode>
						<coordinates>						-159.00043398200555,36.102825065456294,5476741.731039532						 						-157.395695687927,36.118330792443516,5428820.240892936						</coordinates>
					</LineString>
				</Placemark>
				<Placemark>
					<TimeSpan>
						<begin>2012-03-13</begin>
						<end></end>
					</TimeSpan>
					<styleUrl>branch_style2</styleUrl>
					<LineString>
						<tessellate>1</tessellate>
						<altitudeMode>relativeToGround</altitudeMode>
						<coordinates>						-157.395695687927,36.118330792443516,5428820.240892936						 						-155.79137571818686,36.13410340165415,5376334.799303805						</coordinates>
					</LineString>
				</Placemark>
				<Placemark>
					<TimeSpan>
						<begin>2012-03-23</begin>
						<end></end>
					</TimeSpan>
					<styleUrl>branch_style2</styleUrl>
					<LineString>
						<tessellate>1</tessellate>
						<altitudeMode>relativeToGround</altitudeMode>
						<coordinates>						-155.79137571818686,36.13410340165415,5376334.799303805						 						-154.18747995446844,36.15014991257797,5319285.406272145						</coordinates>
					</LineString>
				</Placemark>
				<Placemark>
					<TimeSpan>
						<begin>2012-04-02</begin>
						<end></end>
					</TimeSpan>
					<styleUrl>branch_style2</styleUrl>
					<LineString>
						<tessellate>1</tessellate>
						<altitudeMode>relativeToGround</altitudeMode>
						<coordinates>						-154.18747995446844,36.15014991257797,5319285.406272145						 						-152.58401445096237,36.16647772563892,5257672.06179795						</coordinates>
					</LineString>
				</Placemark>
				<Placemark>
					<TimeSpan>
						<begin>2012-04-12</begin>
						<end></end>
					</TimeSpan>
					<styleUrl>branch_style2</styleUrl>
					<LineString>
						<tessellate>1</tessellate>
						<altitudeMode>relativeToGround</altitudeMode>
						<coordinates>						-152.58401445096237,36.16647772563892,5257672.06179795						 						-150.980985444331,36.18309465397137,5191494.765881224						</coordinates>
					</LineString>
				</Placemark>
				<Placemark>
					<TimeSpan>
						<begin>2012-04-22</begin>
						<end></end>
					</TimeSpan>
					<styleUrl>branch_style2</styleUrl>
					<LineString>
						<tessellate>1</tessellate>
						<altitudeMode>relativeToGround</altitudeMode>
						<coordinates>						-150.980985444331,36.18309465397137,5191494.765881224						 						-149.3783993645574,36.200008958829486,5120753.518521963						</coordinates>
					</LineString>
				</Placemark>
				<Placemark>
					<TimeSpan>
						<begin>2012-05-01</begin>
						<end></end>
					</TimeSpan>
					<styleUrl>branch_style2</styleUrl>
					<LineString>
						<tessellate>1</tessellate>
						<altitudeMode>relativeToGround</altitudeMode>
						<coordinates>						-149.3783993645574,36.200008958829486,5120753.518521963						 						-147.7762628467876,36.21722938916452,5045448.3197201695						</coordinates>
					</LineString>
				</Placemark>
				<Placemark>
					<TimeSpan>
						<begin>2012-05-11</begin>
						<end></end>
					</TimeSpan>
					<styleUrl>branch_style2</styleUrl>
					<LineString>
						<tessellate>1</tessellate>
						<altitudeMode>relativeToGround</altitudeMode>
						<coordinates>						-147.7762628467876,36.21722938916452,5045448.3197201695						 						-146.1745827442916,36.23476522600123,4965579.16947584						</coordinates>
					</LineString>
				</Placemark>
				<Placemark>
					<TimeSpan>
						<begin>2012-05-21</begin>
						<end></end>
					</TimeSpan>
					<styleUrl>branch_style2</styleUrl>
					<LineString>
						<tessellate>1</tessellate>
						<altitudeMode>relativeToGround</altitudeMode>
						<coordinates>						-146.1745827442916,36.23476522600123,4965579.16947584						 						-144.5733661426886,36.2526263323638,4881146.067788983						</coordinates>
					</LineString>
				</Placemark>
				<Placemark>
					<TimeSpan>
						<begin>2012-05-31</begin>
						<end></end>
					</TimeSpan>
					<styleUrl>branch_style2</styleUrl>
					<LineString>
						<tessellate>1</tessellate>
						<altitudeMode>relativeToGround</altitudeMode>
						<coordinates>						-144.5733661426886,36.2526263323638,4881146.067788983						 						-142.97262037560682,36.27082320964656,4792149.014659589						</coordinates>
					</LineString>
				</Placemark>
				<Placemark>
					<TimeSpan>
						<begin>2012-06-10</begin>
						<end></end>
					</TimeSpan>
					<styleUrl>branch_style2</styleUrl>
					<LineString>
						<tessellate>1</tessellate>
						<altitudeMode>relativeToGround</altitudeMode>
						<coordinates>						-142.97262037560682,36.27082320964656,4792149.014659589						 						-141.3723530419781,36.28936706150357,4698588.010087665						</coordinates>
					</LineString>
				</Placemark>
				<Placemark>
					<TimeSpan>
						<begin>2012-06-19</begin>
						<end></end>
					</TimeSpan>
					<styleUrl>branch_style2</styleUrl>
					<LineString>
						<tessellate>1</tessellate>
						<altitudeMode>relativeToGround</altitudeMode>
						<coordinates>						-141.3723530419781,36.28936706150357,4698588.010087665						 						-139.77257202520317,36.30826986655415,4600463.054073207						</coordinates>
					</LineString>
				</Placemark>
				<Placemark>
					<TimeSpan>
						<begin>2012-06-29</begin>
						<end></end>
					</TimeSpan>
					<styleUrl>branch_style2</styleUrl>
					<LineString>
						<tessellate>1</tessellate>
						<altitudeMode>relativeToGround</altitudeMode>
						<coordinates>						-139.77257202520317,36.30826986655415,4600463.054073207						 						-138.17328551446764,36.32754446147855,4497774.146616217						</coordinates>
					</LineString>
				</Placemark>
				<Placemark>
					<TimeSpan>
						<begin>2012-07-09</begin>
						<end></end>
					</TimeSpan>
					<styleUrl>branch_style2</styleUrl>
					<LineString>
						<tessellate>1</tessellate>
						<altitudeMode>relativeToGround</altitudeMode>
						<coordinates>						-138.17328551446764,36.32754446147855,4497774.146616217						 						-136.57450202854412,36.347204636428536,4390521.28771669						</coordinates>
					</LineString>
				</Placemark>
				<Placemark>
					<TimeSpan>
						<begin>2012-07-19</begin>
						<end></end>
					</TimeSpan>
					<styleUrl>branch_style2</styleUrl>
					<LineString>
						<tessellate>1</tessellate>
						<altitudeMode>relativeToGround</altitudeMode>
						<coordinates>						-136.57450202854412,36.347204636428536,4390521.28771669						 						-134.97623044248206,36.36726524512141,4278704.477374636						</coordinates>
					</LineString>
				</Placemark>
				<Placemark>
					<TimeSpan>
						<begin>2012-07-29</begin>
						<end></end>
					</TimeSpan>
					<styleUrl>branch_style2</styleUrl>
					<LineString>
						<tessellate>1</tessellate>
						<altitudeMode>relativeToGround</altitudeMode>
						<coordinates>						-134.97623044248206,36.36726524512141,4278704.477374636						 						-133.37848001767384,36.387742332554865,4162323.715590043						</coordinates>
					</LineString>
				</Placemark>
				<Placemark>
					<TimeSpan>
						<begin>2012-08-07</begin>
						<end></end>
					</TimeSpan>
					<styleUrl>branch_style2</styleUrl>
					<LineString>
						<tessellate>1</tessellate>
						<altitudeMode>relativeToGround</altitudeMode>
						<coordinates>						-133.37848001767384,36.387742332554865,4162323.715590043						 						-131.78126043589032,36.40865328401407,4041379.00236292						</coordinates>
					</LineString>
				</Placemark>
				<Placemark>
					<TimeSpan>
						<begin>2012-08-17</begin>
						<end></end>
					</TimeSpan>
					<styleUrl>branch_style2</styleUrl>
					<LineString>
						<tessellate>1</tessellate>
						<altitudeMode>relativeToGround</altitudeMode>
						<coordinates>						-131.78126043589032,36.40865328401407,4041379.00236292						 						-130.1845818380178,36.43001700000072,3915870.3376932647						</coordinates>
					</LineString>
				</Placemark>
				<Placemark>
					<TimeSpan>
						<begin>2012-08-27</begin>
						<end></end>
					</TimeSpan>
					<styleUrl>branch_style2</styleUrl>
					<LineString>
						<tessellate>1</tessellate>
						<altitudeMode>relativeToGround</altitudeMode>
						<coordinates>						-130.1845818380178,36.43001700000072,3915870.3376932647						 						-128.58845486840357,36.45185410297611,3785797.7215810753						</coordinates>
					</LineString>
				</Placemark>
				<Placemark>
					<TimeSpan>
						<begin>2012-09-06</begin>
						<end></end>
					</TimeSpan>
					<styleUrl>branch_style2</styleUrl>
					<LineString>
						<tessellate>1</tessellate>
						<altitudeMode>relativeToGround</altitudeMode>
						<coordinates>						-128.58845486840357,36.45185410297611,3785797.7215810753						 						-126.99289072594604,36.47418718349424,3651161.1540263556						</coordinates>
					</LineString>
				</Placemark>
				<Placemark>
					<TimeSpan>
						<begin>2012-09-15</begin>
						<end></end>
					</TimeSpan>
					<styleUrl>branch_style2</styleUrl>
					<LineString>
						<tessellate>1</tessellate>
						<altitudeMode>relativeToGround</altitudeMode>
						<coordinates>						-126.99289072594604,36.47418718349424,3651161.1540263556						 						-125.39790122336879,36.49704109557362,3511960.635029098						</coordinates>
					</LineString>
				</Placemark>
				<Placemark>
					<TimeSpan>
						<begin>2012-09-25</begin>
						<end></end>
					</TimeSpan>
					<styleUrl>branch_style2</styleUrl>
					<LineString>
						<tessellate>1</tessellate>
						<altitudeMode>relativeToGround</altitudeMode>
						<coordinates>						-125.39790122336879,36.49704109557362,3511960.635029098						 						-123.80349885652116,36.52044331426702,3368196.164589314						</coordinates>
					</LineString>
				</Placemark>
				<Placemark>
					<TimeSpan>
						<begin>2012-10-05</begin>
						<end></end>
					</TimeSpan>
					<styleUrl>branch_style2</styleUrl>
					<LineString>
						<tessellate>1</tessellate>
						<altitudeMode>relativeToGround</altitudeMode>
						<coordinates>						-123.80349885652116,36.52044331426702,3368196.164589314						 						-122.20969688609522,36.54442437270829,3219867.7427069917						</coordinates>
					</LineString>
				</Placemark>
				<Placemark>
					<TimeSpan>
						<begin>2012-10-15</begin>
						<end></end>
					</TimeSpan>
					<styleUrl>branch_style2</styleUrl>
					<LineString>
						<tessellate>1</tessellate>
						<altitudeMode>relativeToGround</altitudeMode>
						<coordinates>						-122.20969688609522,36.54442437270829,3219867.7427069917						 						-120.61650943490172,36.56901840201414,3066975.3693821356						</coordinates>
					</LineString>
				</Placemark>
				<Placemark>
					<TimeSpan>
						<begin>2012-10-25</begin>
						<end></end>
					</TimeSpan>
					<styleUrl>branch_style2</styleUrl>
					<LineString>
						<tessellate>1</tessellate>
						<altitudeMode>relativeToGround</altitudeMode>
						<coordinates>						-120.61650943490172,36.56901840201414,3066975.3693821356						 						-119.02395160490556,36.59426380618625,2909519.044614751						</coordinates>
					</LineString>
				</Placemark>
				<Placemark>
					<TimeSpan>
						<begin>2012-11-03</begin>
						<end></end>
					</TimeSpan>
					<styleUrl>branch_style2</styleUrl>
					<LineString>
						<tessellate>1</tessellate>
						<altitudeMode>relativeToGround</altitudeMode>
						<coordinates>						-119.02395160490556,36.59426380618625,2909519.044614751						 						-117.43203961972591,36.620204117017195,2747498.7684048302						</coordinates>
					</LineString>
				</Placemark>
				<Placemark>
					<TimeSpan>
						<begin>2012-11-13</begin>
						<end></end>
					</TimeSpan>
					<styleUrl>branch_style2</styleUrl>
					<LineString>
						<tessellate>1</tessellate>
						<altitudeMode>relativeToGround</altitudeMode>
						<coordinates>						-117.43203961972591,36.620204117017195,2747498.7684048302						 						-115.8407910005142,36.64688909329223,2580914.540752381						</coordinates>
					</LineString>
				</Placemark>
				<Placemark>
					<TimeSpan>
						<begin>2012-11-23</begin>
						<end></end>
					</TimeSpan>
					<styleUrl>branch_style2</styleUrl>
					<LineString>
						<tessellate>1</tessellate>
						<altitudeMode>relativeToGround</altitudeMode>
						<coordinates>						-115.8407910005142,36.64688909329223,2580914.540752381						 						-114.25022478642002,36.67437615825218,2409766.3616573922						</coordinates>
					</LineString>
				</Placemark>
				<Placemark>
					<TimeSpan>
						<begin>2012-12-03</begin>
						<end></end>
					</TimeSpan>
					<styleUrl>branch_style2</styleUrl>
					<LineString>
						<tessellate>1</tessellate>
						<altitudeMode>relativeToGround</altitudeMode>
						<coordinates>						-114.25022478642002,36.67437615825218,2409766.3616573922						 						-112.66036181594086,36.70273231626694,2234054.2311198786						</coordinates>
					</LineString>
				</Placemark>
				<Placemark>
					<TimeSpan>
						<begin>2012-12-13</begin>
						<end></end>
					</TimeSpan>
					<styleUrl>branch_style2</styleUrl>
					<LineString>
						<tessellate>1</tessellate>
						<altitudeMode>relativeToGround</altitudeMode>
						<coordinates>						-112.66036181594086,36.70273231626694,2234054.2311198786						 						-111.0712250935427,36.732036766551055,2053778.1491398253						</coordinates>
					</LineString>
				</Placemark>
				<Placemark>
					<TimeSpan>
						<begin>2012-12-22</begin>
						<end></end>
					</TimeSpan>
					<styleUrl>branch_style2</styleUrl>
					<LineString>
						<tessellate>1</tessellate>
						<altitudeMode>relativeToGround</altitudeMode>
						<coordinates>						-111.0712250935427,36.732036766551055,2053778.1491398253						 						-109.48284027931209,36.762384562452226,1868938.1157172397						</coordinates>
					</LineString>
				</Placemark>
				<Placemark>
					<TimeSpan>
						<begin>2013-01-01</begin>
						<end></end>
					</TimeSpan>
					<styleUrl>branch_style2</styleUrl>
					<LineString>
						<tessellate>1</tessellate>
						<altitudeMode>relativeToGround</altitudeMode>
						<coordinates>						-109.48284027931209,36.762384562452226,1868938.1157172397						 						-107.89523636250094,36.7938918971966,1679534.1308521219						</coordinates>
					</LineString>
				</Placemark>
				<Placemark>
					<TimeSpan>
						<begin>2013-01-11</begin>
						<end></end>
					</TimeSpan>
					<styleUrl>branch_style2</styleUrl>
					<LineString>
						<tessellate>1</tessellate>
						<altitudeMode>relativeToGround</altitudeMode>
						<coordinates>						-107.89523636250094,36.7938918971966,1679534.1308521219						 						-106.30844662191204,36.826704032632215,1485566.1945444718						</coordinates>
					</LineString>
				</Placemark>
				<Placemark>
					<TimeSpan>
						<begin>2013-01-21</begin>
						<end></end>
					</TimeSpan>
					<styleUrl>branch_style2</styleUrl>
					<LineString>
						<tessellate>1</tessellate>
						<altitudeMode>relativeToGround</altitudeMode>
						<coordinates>						-106.30844662191204,36.826704032632215,1485566.1945444718						 						-104.72251005781052,36.86100775881541,1287034.3067942895						</coordinates>
					</LineString>
				</Placemark>
				<Placemark>
					<TimeSpan>
						<begin>2013-01-31</begin>
						<end></end>
					</TimeSpan>
					<styleUrl>branch_style2</styleUrl>
					<LineString>
						<tessellate>1</tessellate>
						<altitudeMode>relativeToGround</altitudeMode>
						<coordinates>						-104.72251005781052,36.86100775881541,1287034.3067942895						 						-103.13747365202211,36.897052160076186,1083938.4676015712						</coordinates>
					</LineString>
				</Placemark>
				<Placemark>
					<TimeSpan>
						<begin>2013-02-09</begin>
						<end></end>
					</TimeSpan>
					<styleUrl>branch_style2</styleUrl>
					<LineString>
						<tessellate>1</tessellate>
						<altitudeMode>relativeToGround</altitudeMode>
						<coordinates>						-103.13747365202211,36.897052160076186,1083938.4676015712						 						-101.55339621361846,36.935185993794406,876278.6769663244						</coordinates>
					</LineString>
				</Placemark>
				<Placemark>
					<TimeSpan>
						<begin>2013-02-19</begin>
						<end></end>
					</TimeSpan>
					<styleUrl>branch_style2</styleUrl>
					<LineString>
						<tessellate>1</tessellate>
						<altitudeMode>relativeToGround</altitudeMode>
						<coordinates>						-101.55339621361846,36.935185993794406,876278.6769663244						 						-99.9703556377211,36.9759324469001,664054.9348885417						</coordinates>
					</LineString>
				</Placemark>
				<Placemark>
					<TimeSpan>
						<begin>2013-03-01</begin>
						<end></end>
					</TimeSpan>
					<styleUrl>branch_style2</styleUrl>
					<LineString>
						<tessellate>1</tessellate>
						<altitudeMode>relativeToGround</altitudeMode>
						<coordinates>						-99.9703556377211,36.9759324469001,664054.9348885417						 						-98.38846486983459,37.02016356287991,447267.2413682267						</coordinates>
					</LineString>
				</Placemark>
				<Placemark>
					<TimeSpan>
						<begin>2013-03-11</begin>
						<end></end>
					</TimeSpan>
					<styleUrl>branch_style2</styleUrl>
					<LineString>
						<tessellate>1</tessellate>
						<altitudeMode>relativeToGround</altitudeMode>
						<coordinates>						-98.38846486983459,37.02016356287991,447267.2413682267						 						-96.80791702306134,37.069623498547585,225915.59640537947						</coordinates>
					</LineString>
				</Placemark>
				<Placemark>
					<TimeSpan>
						<begin>2013-03-21</begin>
						<end></end>
					</TimeSpan>
					<styleUrl>branch_style2</styleUrl>
					<LineString>
						<tessellate>1</tessellate>
						<altitudeMode>relativeToGround</altitudeMode>
						<coordinates>						-96.80791702306134,37.069623498547585,225915.59640537947						 						-95.2300033569336,37.13999938964844,0.0						</coordinates>
					</LineString>
				</Placemark>
			</Folder>
			<Folder>
				<name>US:Mexico</name>
				<Placemark>
					<TimeSpan>
						<begin>2015-02-02</begin>
						<end></end>
					</TimeSpan>
					<styleUrl>branch_style3</styleUrl>
					<LineString>
						<tessellate>1</tessellate>
						<altitudeMode>relativeToGround</altitudeMode>
						<coordinates>						-95.2300033569336,37.13999938964844,0.0						 						-95.2940331377907,37.0023748016298,26275.306628536637						</coordinates>
					</LineString>
				</Placemark>
				<Placemark>
					<TimeSpan>
						<begin>2015-02-05</begin>
						<end></end>
					</TimeSpan>
					<styleUrl>branch_style3</styleUrl>
					<LineString>
						<tessellate>1</tessellate>
						<altitudeMode>relativeToGround</altitudeMode>
						<coordinates>						-95.2940331377907,37.0023748016298,26275.306628536637						 						-95.35822936355173,36.864750497039964,52019.7989817493						</coordinates>
					</LineString>
				</Placemark>
				<Placemark>
					<TimeSpan>
						<begin>2015-02-08</begin>
						<end></end>
					</TimeSpan>
					<styleUrl>branch_style3</styleUrl>
					<LineString>
						<tessellate>1</tessellate>
						<altitudeMode>relativeToGround</altitudeMode>
						<coordinates>						-95.35822936355173,36.864750497039964,52019.7989817493						 						-95.42259132877685,36.72712647855865,77233.477059638						</coordinates>
					</LineString>
				</Placemark>
				<Placemark>
					<TimeSpan>
						<begin>2015-02-11</begin>
						<end></end>
					</TimeSpan>
					<styleUrl>branch_style3</styleUrl>
					<LineString>
						<tessellate>1</tessellate>
						<altitudeMode>relativeToGround</altitudeMode>
						<coordinates>						-95.42259132877685,36.72712647855865,77233.477059638						 						-95.48711832386059,36.58950274890557,101916.34086220272						</coordinates>
					</LineString>
				</Placemark>
				<Placemark>
					<TimeSpan>
						<begin>2015-02-14</begin>
						<end></end>
					</TimeSpan>
					<styleUrl>branch_style3</styleUrl>
					<LineString>
						<tessellate>1</tessellate>
						<altitudeMode>relativeToGround</altitudeMode>
						<coordinates>						-95.48711832386059,36.58950274890557,101916.34086220272						 						-95.5518096350662,36.451879310841676,126068.39038944346						</coordinates>
					</LineString>
				</Placemark>
				<Placemark>
					<TimeSpan>
						<begin>2015-02-17</begin>
						<end></end>
					</TimeSpan>
					<styleUrl>branch_style3</styleUrl>
					<LineString>
						<tessellate>1</tessellate>
						<altitudeMode>relativeToGround</altitudeMode>
						<coordinates>						-95.5518096350662,36.451879310841676,126068.39038944346						 						-95.61666454456048,36.31425616717037,149689.62564136024						</coordinates>
					</LineString>
				</Placemark>
				<Placemark>
					<TimeSpan>
						<begin>2015-02-20</begin>
						<end></end>
					</TimeSpan>
					<styleUrl>branch_style3</styleUrl>
					<LineString>
						<tessellate>1</tessellate>
						<altitudeMode>relativeToGround</altitudeMode>
						<coordinates>						-95.61666454456048,36.31425616717037,149689.62564136024						 						-95.68168233044862,36.17663332073889,172780.04661795302						</coordinates>
					</LineString>
				</Placemark>
				<Placemark>
					<TimeSpan>
						<begin>2015-02-23</begin>
						<end></end>
					</TimeSpan>
					<styleUrl>branch_style3</styleUrl>
					<LineString>
						<tessellate>1</tessellate>
						<altitudeMode>relativeToGround</altitudeMode>
						<coordinates>						-95.68168233044862,36.17663332073889,172780.04661795302						 						-95.74686226680957,36.039010774439646,195339.65331922186						</coordinates>
					</LineString>
				</Placemark>
				<Placemark>
					<TimeSpan>
						<begin>2015-02-26</begin>
						<end></end>
					</TimeSpan>
					<styleUrl>branch_style3</styleUrl>
					<LineString>
						<tessellate>1</tessellate>
						<altitudeMode>relativeToGround</altitudeMode>
						<coordinates>						-95.74686226680957,36.039010774439646,195339.65331922186						 						-95.81220362373138,35.90138853121166,217368.44574516674						</coordinates>
					</LineString>
				</Placemark>
				<Placemark>
					<TimeSpan>
						<begin>2015-02-28</begin>
						<end></end>
					</TimeSpan>
					<styleUrl>branch_style3</styleUrl>
					<LineString>
						<tessellate>1</tessellate>
						<altitudeMode>relativeToGround</altitudeMode>
						<coordinates>						-95.81220362373138,35.90138853121166,217368.44574516674						 						-95.87770566734709,35.763766594042096,238866.4238957876						</coordinates>
					</LineString>
				</Placemark>
				<Placemark>
					<TimeSpan>
						<begin>2015-03-03</begin>
						<end></end>
					</TimeSpan>
					<styleUrl>branch_style3</styleUrl>
					<LineString>
						<tessellate>1</tessellate>
						<altitudeMode>relativeToGround</altitudeMode>
						<coordinates>						-95.87770566734709,35.763766594042096,238866.4238957876						 						-95.94336765987069,35.62614496596782,259833.5877710845						</coordinates>
					</LineString>
				</Placemark>
				<Placemark>
					<TimeSpan>
						<begin>2015-03-06</begin>
						<end></end>
					</TimeSpan>
					<styleUrl>branch_style3</styleUrl>
					<LineString>
						<tessellate>1</tessellate>
						<altitudeMode>relativeToGround</altitudeMode>
						<coordinates>						-95.94336765987069,35.62614496596782,259833.5877710845						 						-96.00918885963343,35.488523650077,280269.93737105746						</coordinates>
					</LineString>
				</Placemark>
				<Placemark>
					<TimeSpan>
						<begin>2015-03-09</begin>
						<end></end>
					</TimeSpan>
					<styleUrl>branch_style3</styleUrl>
					<LineString>
						<tessellate>1</tessellate>
						<altitudeMode>relativeToGround</altitudeMode>
						<coordinates>						-96.00918885963343,35.488523650077,280269.93737105746						 						-96.07516852112036,35.35090264951088,300175.4726957064						</coordinates>
					</LineString>
				</Placemark>
				<Placemark>
					<TimeSpan>
						<begin>2015-03-12</begin>
						<end></end>
					</TimeSpan>
					<styleUrl>branch_style3</styleUrl>
					<LineString>
						<tessellate>1</tessellate>
						<altitudeMode>relativeToGround</altitudeMode>
						<coordinates>						-96.07516852112036,35.35090264951088,300175.4726957064						 						-96.14130589500735,35.21328196746556,319550.19374503137						</coordinates>
					</LineString>
				</Placemark>
				<Placemark>
					<TimeSpan>
						<begin>2015-03-15</begin>
						<end></end>
					</TimeSpan>
					<styleUrl>branch_style3</styleUrl>
					<LineString>
						<tessellate>1</tessellate>
						<altitudeMode>relativeToGround</altitudeMode>
						<coordinates>						-96.14130589500735,35.21328196746556,319550.19374503137						 						-96.20760022819807,35.075661607193894,338394.10051903245						</coordinates>
					</LineString>
				</Placemark>
				<Placemark>
					<TimeSpan>
						<begin>2015-03-18</begin>
						<end></end>
					</TimeSpan>
					<styleUrl>branch_style3</styleUrl>
					<LineString>
						<tessellate>1</tessellate>
						<altitudeMode>relativeToGround</altitudeMode>
						<coordinates>						-96.20760022819807,35.075661607193894,338394.10051903245						 						-96.27405076386171,34.93804157200741,356707.1930177095						</coordinates>
					</LineString>
				</Placemark>
				<Placemark>
					<TimeSpan>
						<begin>2015-03-21</begin>
						<end></end>
					</TimeSpan>
					<styleUrl>branch_style3</styleUrl>
					<LineString>
						<tessellate>1</tessellate>
						<altitudeMode>relativeToGround</altitudeMode>
						<coordinates>						-96.27405076386171,34.93804157200741,356707.1930177095						 						-96.34065674147061,34.800421865278466,374489.47124106257						</coordinates>
					</LineString>
				</Placemark>
				<Placemark>
					<TimeSpan>
						<begin>2015-03-24</begin>
						<end></end>
					</TimeSpan>
					<styleUrl>branch_style3</styleUrl>
					<LineString>
						<tessellate>1</tessellate>
						<altitudeMode>relativeToGround</altitudeMode>
						<coordinates>						-96.34065674147061,34.800421865278466,374489.47124106257						 						-96.40741739683845,34.66280249044236,391740.9351890917						</coordinates>
					</LineString>
				</Placemark>
				<Placemark>
					<TimeSpan>
						<begin>2015-03-26</begin>
						<end></end>
					</TimeSpan>
					<styleUrl>branch_style3</styleUrl>
					<LineString>
						<tessellate>1</tessellate>
						<altitudeMode>relativeToGround</altitudeMode>
						<coordinates>						-96.40741739683845,34.66280249044236,391740.9351890917						 						-96.47433196215871,34.525183450999606,408461.5848617968						</coordinates>
					</LineString>
				</Placemark>
				<Placemark>
					<TimeSpan>
						<begin>2015-03-29</begin>
						<end></end>
					</TimeSpan>
					<styleUrl>branch_style3</styleUrl>
					<LineString>
						<tessellate>1</tessellate>
						<altitudeMode>relativeToGround</altitudeMode>
						<coordinates>						-96.47433196215871,34.525183450999606,408461.5848617968						 						-96.54139966604343,34.38756475051837,424651.4202591779						</coordinates>
					</LineString>
				</Placemark>
				<Placemark>
					<TimeSpan>
						<begin>2015-04-01</begin>
						<end></end>
					</TimeSpan>
					<styleUrl>branch_style3</styleUrl>
					<LineString>
						<tessellate>1</tessellate>
						<altitudeMode>relativeToGround</altitudeMode>
						<coordinates>						-96.54139966604343,34.38756475051837,424651.4202591779						 						-96.60861973356242,34.24994639263694,440310.44138123514						</coordinates>
					</LineString>
				</Placemark>
				<Placemark>
					<TimeSpan>
						<begin>2015-04-04</begin>
						<end></end>
					</TimeSpan>
					<styleUrl>branch_style3</styleUrl>
					<LineString>
						<tessellate>1</tessellate>
						<altitudeMode>relativeToGround</altitudeMode>
						<coordinates>						-96.60861973356242,34.24994639263694,440310.44138123514						 						-96.67599138628289,34.112328381066405,455438.6482279683						</coordinates>
					</LineString>
				</Placemark>
				<Placemark>
					<TimeSpan>
						<begin>2015-04-07</begin>
						<end></end>
					</TimeSpan>
					<styleUrl>branch_style3</styleUrl>
					<LineString>
						<tessellate>1</tessellate>
						<altitudeMode>relativeToGround</altitudeMode>
						<coordinates>						-96.67599138628289,34.112328381066405,455438.6482279683						 						-96.74351384230921,33.974710719593396,470036.04079937766						</coordinates>
					</LineString>
				</Placemark>
				<Placemark>
					<TimeSpan>
						<begin>2015-04-10</begin>
						<end></end>
					</TimeSpan>
					<styleUrl>branch_style3</styleUrl>
					<LineString>
						<tessellate>1</tessellate>
						<altitudeMode>relativeToGround</altitudeMode>
						<coordinates>						-96.74351384230921,33.974710719593396,470036.04079937766						 						-96.81118631632346,33.83709341208305,484102.6190954629						</coordinates>
					</LineString>
				</Placemark>
				<Placemark>
					<TimeSpan>
						<begin>2015-04-13</begin>
						<end></end>
					</TimeSpan>
					<styleUrl>branch_style3</styleUrl>
					<LineString>
						<tessellate>1</tessellate>
						<altitudeMode>relativeToGround</altitudeMode>
						<coordinates>						-96.81118631632346,33.83709341208305,484102.6190954629						 						-96.87900801962604,33.69947646248204,497638.3831162242						</coordinates>
					</LineString>
				</Placemark>
				<Placemark>
					<TimeSpan>
						<begin>2015-04-16</begin>
						<end></end>
					</TimeSpan>
					<styleUrl>branch_style3</styleUrl>
					<LineString>
						<tessellate>1</tessellate>
						<altitudeMode>relativeToGround</altitudeMode>
						<coordinates>						-96.87900801962604,33.69947646248204,497638.3831162242						 						-96.9469781601769,33.5618598748219,510643.33286166145						</coordinates>
					</LineString>
				</Placemark>
				<Placemark>
					<TimeSpan>
						<begin>2015-04-19</begin>
						<end></end>
					</TimeSpan>
					<styleUrl>branch_style3</styleUrl>
					<LineString>
						<tessellate>1</tessellate>
						<altitudeMode>relativeToGround</altitudeMode>
						<coordinates>						-96.9469781601769,33.5618598748219,510643.33286166145						 						-97.01509594263732,33.42424365322236,523117.4683317748						</coordinates>
					</LineString>
				</Placemark>
				<Placemark>
					<TimeSpan>
						<begin>2015-04-21</begin>
						<end></end>
					</TimeSpan>
					<styleUrl>branch_style3</styleUrl>
					<LineString>
						<tessellate>1</tessellate>
						<altitudeMode>relativeToGround</altitudeMode>
						<coordinates>						-97.01509594263732,33.42424365322236,523117.4683317748						 						-97.08336056841202,33.28662780189503,535060.7895265642						</coordinates>
					</LineString>
				</Placemark>
				<Placemark>
					<TimeSpan>
						<begin>2015-04-24</begin>
						<end></end>
					</TimeSpan>
					<styleUrl>branch_style3</styleUrl>
					<LineString>
						<tessellate>1</tessellate>
						<altitudeMode>relativeToGround</altitudeMode>
						<coordinates>						-97.08336056841202,33.28662780189503,535060.7895265642						 						-97.1517712356918,33.14901232514719,546473.2964460297						</coordinates>
					</LineString>
				</Placemark>
				<Placemark>
					<TimeSpan>
						<begin>2015-04-27</begin>
						<end></end>
					</TimeSpan>
					<styleUrl>branch_style3</styleUrl>
					<LineString>
						<tessellate>1</tessellate>
						<altitudeMode>relativeToGround</altitudeMode>
						<coordinates>						-97.1517712356918,33.14901232514719,546473.2964460297						 						-97.22032713949685,33.0113972273858,557354.9890901711						</coordinates>
					</LineString>
				</Placemark>
				<Placemark>
					<TimeSpan>
						<begin>2015-04-30</begin>
						<end></end>
					</TimeSpan>
					<styleUrl>branch_style3</styleUrl>
					<LineString>
						<tessellate>1</tessellate>
						<altitudeMode>relativeToGround</altitudeMode>
						<coordinates>						-97.22032713949685,33.0113972273858,557354.9890901711						 						-97.28902747172047,32.87378251312178,567705.8674589886						</coordinates>
					</LineString>
				</Placemark>
				<Placemark>
					<TimeSpan>
						<begin>2015-05-03</begin>
						<end></end>
					</TimeSpan>
					<styleUrl>branch_style3</styleUrl>
					<LineString>
						<tessellate>1</tessellate>
						<altitudeMode>relativeToGround</altitudeMode>
						<coordinates>						-97.28902747172047,32.87378251312178,567705.8674589886						 						-97.3578714211737,32.73616818697456,577525.9315524821						</coordinates>
					</LineString>
				</Placemark>
				<Placemark>
					<TimeSpan>
						<begin>2015-05-06</begin>
						<end></end>
					</TimeSpan>
					<styleUrl>branch_style3</styleUrl>
					<LineString>
						<tessellate>1</tessellate>
						<altitudeMode>relativeToGround</altitudeMode>
						<coordinates>						-97.3578714211737,32.73616818697456,577525.9315524821						 						-97.42685817362998,32.598554253676795,586815.1813706516						</coordinates>
					</LineString>
				</Placemark>
				<Placemark>
					<TimeSpan>
						<begin>2015-05-09</begin>
						<end></end>
					</TimeSpan>
					<styleUrl>branch_style3</styleUrl>
					<LineString>
						<tessellate>1</tessellate>
						<altitudeMode>relativeToGround</altitudeMode>
						<coordinates>						-97.42685817362998,32.598554253676795,586815.1813706516						 						-97.49598691187127,32.460940718079485,595573.616913497						</coordinates>
					</LineString>
				</Placemark>
				<Placemark>
					<TimeSpan>
						<begin>2015-05-12</begin>
						<end></end>
					</TimeSpan>
					<styleUrl>branch_style3</styleUrl>
					<LineString>
						<tessellate>1</tessellate>
						<altitudeMode>relativeToGround</altitudeMode>
						<coordinates>						-97.49598691187127,32.460940718079485,595573.616913497						 						-97.56525681573441,32.32332758515733,603801.2381810185						</coordinates>
					</LineString>
				</Placemark>
				<Placemark>
					<TimeSpan>
						<begin>2015-05-15</begin>
						<end></end>
					</TimeSpan>
					<styleUrl>branch_style3</styleUrl>
					<LineString>
						<tessellate>1</tessellate>
						<altitudeMode>relativeToGround</altitudeMode>
						<coordinates>						-97.56525681573441,32.32332758515733,603801.2381810185						 						-97.63466706215824,32.185714860014436,611498.0451732163						</coordinates>
					</LineString>
				</Placemark>
				<Placemark>
					<TimeSpan>
						<begin>2015-05-17</begin>
						<end></end>
					</TimeSpan>
					<styleUrl>branch_style3</styleUrl>
					<LineString>
						<tessellate>1</tessellate>
						<altitudeMode>relativeToGround</altitudeMode>
						<coordinates>						-97.63466706215824,32.185714860014436,611498.0451732163						 						-97.70421682523195,32.048102547890394,618664.0378900899						</coordinates>
					</LineString>
				</Placemark>
				<Placemark>
					<TimeSpan>
						<begin>2015-05-20</begin>
						<end></end>
					</TimeSpan>
					<styleUrl>branch_style3</styleUrl>
					<LineString>
						<tessellate>1</tessellate>
						<altitudeMode>relativeToGround</altitudeMode>
						<coordinates>						-97.70421682523195,32.048102547890394,618664.0378900899						 						-97.77390527624377,31.910490654166736,625299.2163316396						</coordinates>
					</LineString>
				</Placemark>
				<Placemark>
					<TimeSpan>
						<begin>2015-05-23</begin>
						<end></end>
					</TimeSpan>
					<styleUrl>branch_style3</styleUrl>
					<LineString>
						<tessellate>1</tessellate>
						<altitudeMode>relativeToGround</altitudeMode>
						<coordinates>						-97.77390527624377,31.910490654166736,625299.2163316396						 						-97.84373158373111,31.772879184373775,631403.5804978652						</coordinates>
					</LineString>
				</Placemark>
				<Placemark>
					<TimeSpan>
						<begin>2015-05-26</begin>
						<end></end>
					</TimeSpan>
					<styleUrl>branch_style3</styleUrl>
					<LineString>
						<tessellate>1</tessellate>
						<altitudeMode>relativeToGround</altitudeMode>
						<coordinates>						-97.84373158373111,31.772879184373775,631403.5804978652						 						-97.91369491353151,31.63526814419801,636977.1303887669						</coordinates>
					</LineString>
				</Placemark>
				<Placemark>
					<TimeSpan>
						<begin>2015-05-29</begin>
						<end></end>
					</TimeSpan>
					<styleUrl>branch_style3</styleUrl>
					<LineString>
						<tessellate>1</tessellate>
						<altitudeMode>relativeToGround</altitudeMode>
						<coordinates>						-97.91369491353151,31.63526814419801,636977.1303887669						 						-97.98379442883454,31.49765753948987,642019.8660043445						</coordinates>
					</LineString>
				</Placemark>
				<Placemark>
					<TimeSpan>
						<begin>2015-06-01</begin>
						<end></end>
					</TimeSpan>
					<styleUrl>branch_style3</styleUrl>
					<LineString>
						<tessellate>1</tessellate>
						<altitudeMode>relativeToGround</altitudeMode>
						<coordinates>						-97.98379442883454,31.49765753948987,642019.8660043445						 						-98.05402929023522,31.360047376272057,646531.7873445983						</coordinates>
					</LineString>
				</Placemark>
				<Placemark>
					<TimeSpan>
						<begin>2015-06-04</begin>
						<end></end>
					</TimeSpan>
					<styleUrl>branch_style3</styleUrl>
					<LineString>
						<tessellate>1</tessellate>
						<altitudeMode>relativeToGround</altitudeMode>
						<coordinates>						-98.05402929023522,31.360047376272057,646531.7873445983						 						-98.12439865578864,31.222437660748557,650512.8944095281						</coordinates>
					</LineString>
				</Placemark>
				<Placemark>
					<TimeSpan>
						<begin>2015-06-07</begin>
						<end></end>
					</TimeSpan>
					<styleUrl>branch_style3</styleUrl>
					<LineString>
						<tessellate>1</tessellate>
						<altitudeMode>relativeToGround</altitudeMode>
						<coordinates>						-98.12439865578864,31.222437660748557,650512.8944095281						 						-98.19490168106567,31.08482839931412,653963.1871991339						</coordinates>
					</LineString>
				</Placemark>
				<Placemark>
					<TimeSpan>
						<begin>2015-06-10</begin>
						<end></end>
					</TimeSpan>
					<styleUrl>branch_style3</styleUrl>
					<LineString>
						<tessellate>1</tessellate>
						<altitudeMode>relativeToGround</altitudeMode>
						<coordinates>						-98.19490168106567,31.08482839931412,653963.1871991339						 						-98.26553751921062,30.947219598564498,656882.665713416						</coordinates>
					</LineString>
				</Placemark>
				<Placemark>
					<TimeSpan>
						<begin>2015-06-12</begin>
						<end></end>
					</TimeSpan>
					<styleUrl>branch_style3</styleUrl>
					<LineString>
						<tessellate>1</tessellate>
						<altitudeMode>relativeToGround</altitudeMode>
						<coordinates>						-98.26553751921062,30.947219598564498,656882.665713416						 						-98.33630532100032,30.809611265307495,659271.3299523739						</coordinates>
					</LineString>
				</Placemark>
				<Placemark>
					<TimeSpan>
						<begin>2015-06-15</begin>
						<end></end>
					</TimeSpan>
					<styleUrl>branch_style3</styleUrl>
					<LineString>
						<tessellate>1</tessellate>
						<altitudeMode>relativeToGround</altitudeMode>
						<coordinates>						-98.33630532100032,30.809611265307495,659271.3299523739						 						-98.4072042349049,30.672003406574714,661129.1799160077						</coordinates>
					</LineString>
				</Placemark>
				<Placemark>
					<TimeSpan>
						<begin>2015-06-18</begin>
						<end></end>
					</TimeSpan>
					<styleUrl>branch_style3</styleUrl>
					<LineString>
						<tessellate>1</tessellate>
						<altitudeMode>relativeToGround</altitudeMode>
						<coordinates>						-98.4072042349049,30.672003406574714,661129.1799160077						 						-98.47823340715088,30.534396029634276,662456.2156043176						</coordinates>
					</LineString>
				</Placemark>
				<Placemark>
					<TimeSpan>
						<begin>2015-06-21</begin>
						<end></end>
					</TimeSpan>
					<styleUrl>branch_style3</styleUrl>
					<LineString>
						<tessellate>1</tessellate>
						<altitudeMode>relativeToGround</altitudeMode>
						<coordinates>						-98.47823340715088,30.534396029634276,662456.2156043176						 						-98.54939198178586,30.396789142004504,663252.4370173035						</coordinates>
					</LineString>
				</Placemark>
				<Placemark>
					<TimeSpan>
						<begin>2015-06-24</begin>
						<end></end>
					</TimeSpan>
					<styleUrl>branch_style3</styleUrl>
					<LineString>
						<tessellate>1</tessellate>
						<altitudeMode>relativeToGround</altitudeMode>
						<coordinates>						-98.54939198178586,30.396789142004504,663252.4370173035						 						-98.62067910074616,30.259182751468654,663517.8441549655						</coordinates>
					</LineString>
				</Placemark>
				<Placemark>
					<TimeSpan>
						<begin>2015-06-27</begin>
						<end></end>
					</TimeSpan>
					<styleUrl>branch_style3</styleUrl>
					<LineString>
						<tessellate>1</tessellate>
						<altitudeMode>relativeToGround</altitudeMode>
						<coordinates>						-98.62067910074616,30.259182751468654,663517.8441549655						 						-98.69209390392653,30.121576866090845,663252.4370173035						</coordinates>
					</LineString>
				</Placemark>
				<Placemark>
					<TimeSpan>
						<begin>2015-06-30</begin>
						<end></end>
					</TimeSpan>
					<styleUrl>branch_style3</styleUrl>
					<LineString>
						<tessellate>1</tessellate>
						<altitudeMode>relativeToGround</altitudeMode>
						<coordinates>						-98.69209390392653,30.121576866090845,663252.4370173035						 						-98.76363552925301,29.983971494233348,662456.2156043175						</coordinates>
					</LineString>
				</Placemark>
				<Placemark>
					<TimeSpan>
						<begin>2015-07-03</begin>
						<end></end>
					</TimeSpan>
					<styleUrl>branch_style3</styleUrl>
					<LineString>
						<tessellate>1</tessellate>
						<altitudeMode>relativeToGround</altitudeMode>
						<coordinates>						-98.76363552925301,29.983971494233348,662456.2156043175						 						-98.8353031127587,29.846366644575173,661129.1799160076						</coordinates>
					</LineString>
				</Placemark>
				<Placemark>
					<TimeSpan>
						<begin>2015-07-06</begin>
						<end></end>
					</TimeSpan>
					<styleUrl>branch_style3</styleUrl>
					<LineString>
						<tessellate>1</tessellate>
						<altitudeMode>relativeToGround</altitudeMode>
						<coordinates>						-98.8353031127587,29.846366644575173,661129.1799160076						 						-98.90709578866301,29.70876232613244,659271.3299523736						</coordinates>
					</LineString>
				</Placemark>
				<Placemark>
					<TimeSpan>
						<begin>2015-07-08</begin>
						<end></end>
					</TimeSpan>
					<styleUrl>branch_style3</styleUrl>
					<LineString>
						<tessellate>1</tessellate>
						<altitudeMode>relativeToGround</altitudeMode>
						<coordinates>						-98.90709578866301,29.70876232613244,659271.3299523736						 						-98.97901268945495,29.571158548280334,656882.6657134157						</coordinates>
					</LineString>
				</Placemark>
				<Placemark>
					<TimeSpan>
						<begin>2015-07-11</begin>
						<end></end>
					</TimeSpan>
					<styleUrl>branch_style3</styleUrl>
					<LineString>
						<tessellate>1</tessellate>
						<altitudeMode>relativeToGround</altitudeMode>
						<coordinates>						-98.97901268945495,29.571158548280334,656882.6657134157						 						-99.05105294598039,29.43355532077714,653963.1871991339						</coordinates>
					</LineString>
				</Placemark>
				<Placemark>
					<TimeSpan>
						<begin>2015-07-14</begin>
						<end></end>
					</TimeSpan>
					<styleUrl>branch_style3</styleUrl>
					<LineString>
						<tessellate>1</tessellate>
						<altitudeMode>relativeToGround</altitudeMode>
						<coordinates>						-99.05105294598039,29.43355532077714,653963.1871991339						 						-99.123215687534,29.295952653790394,650512.894409528						</coordinates>
					</LineString>
				</Placemark>
				<Placemark>
					<TimeSpan>
						<begin>2015-07-17</begin>
						<end></end>
					</TimeSpan>
					<styleUrl>branch_style3</styleUrl>
					<LineString>
						<tessellate>1</tessellate>
						<altitudeMode>relativeToGround</altitudeMode>
						<coordinates>						-99.123215687534,29.295952653790394,650512.894409528						 						-99.19550004195676,29.15835055792553,646531.7873445984						</coordinates>
					</LineString>
				</Placemark>
				<Placemark>
					<TimeSpan>
						<begin>2015-07-20</begin>
						<end></end>
					</TimeSpan>
					<styleUrl>branch_style3</styleUrl>
					<LineString>
						<tessellate>1</tessellate>
						<altitudeMode>relativeToGround</altitudeMode>
						<coordinates>						-99.19550004195676,29.15835055792553,646531.7873445984						 						-99.26790513573897,29.020749044257226,642019.8660043447						</coordinates>
					</LineString>
				</Placemark>
				<Placemark>
					<TimeSpan>
						<begin>2015-07-23</begin>
						<end></end>
					</TimeSpan>
					<styleUrl>branch_style3</styleUrl>
					<LineString>
						<tessellate>1</tessellate>
						<altitudeMode>relativeToGround</altitudeMode>
						<coordinates>						-99.26790513573897,29.020749044257226,642019.8660043447						 						-99.34043009413001,28.88314812436379,636977.1303887669						</coordinates>
					</LineString>
				</Placemark>
				<Placemark>
					<TimeSpan>
						<begin>2015-07-26</begin>
						<end></end>
					</TimeSpan>
					<styleUrl>branch_style3</styleUrl>
					<LineString>
						<tessellate>1</tessellate>
						<altitudeMode>relativeToGround</altitudeMode>
						<coordinates>						-99.34043009413001,28.88314812436379,636977.1303887669						 						-99.41307404125577,28.74554781036502,631403.5804978652						</coordinates>
					</LineString>
				</Placemark>
				<Placemark>
					<TimeSpan>
						<begin>2015-07-29</begin>
						<end></end>
					</TimeSpan>
					<styleUrl>branch_style3</styleUrl>
					<LineString>
						<tessellate>1</tessellate>
						<altitudeMode>relativeToGround</altitudeMode>
						<coordinates>						-99.41307404125577,28.74554781036502,631403.5804978652						 						-99.4858361002438,28.607948114963975,625299.2163316394						</coordinates>
					</LineString>
				</Placemark>
				<Placemark>
					<TimeSpan>
						<begin>2015-08-01</begin>
						<end></end>
					</TimeSpan>
					<styleUrl>branch_style3</styleUrl>
					<LineString>
						<tessellate>1</tessellate>
						<altitudeMode>relativeToGround</altitudeMode>
						<coordinates>						-99.4858361002438,28.607948114963975,625299.2163316394						 						-99.5587153933585,28.47034905149306,618664.0378900899						</coordinates>
					</LineString>
				</Placemark>
				<Placemark>
					<TimeSpan>
						<begin>2015-08-04</begin>
						<end></end>
					</TimeSpan>
					<styleUrl>branch_style3</styleUrl>
					<LineString>
						<tessellate>1</tessellate>
						<altitudeMode>relativeToGround</altitudeMode>
						<coordinates>						-99.5587153933585,28.47034905149306,618664.0378900899						 						-99.63171104214676,28.332750633965198,611498.0451732161						</coordinates>
					</LineString>
				</Placemark>
				<Placemark>
					<TimeSpan>
						<begin>2015-08-06</begin>
						<end></end>
					</TimeSpan>
					<styleUrl>branch_style3</styleUrl>
					<LineString>
						<tessellate>1</tessellate>
						<altitudeMode>relativeToGround</altitudeMode>
						<coordinates>						-99.63171104214676,28.332750633965198,611498.0451732161						 						-99.70482216759588,28.19515287713061,603801.2381810185						</coordinates>
					</LineString>
				</Placemark>
				<Placemark>
					<TimeSpan>
						<begin>2015-08-09</begin>
						<end></end>
					</TimeSpan>
					<styleUrl>branch_style3</styleUrl>
					<LineString>
						<tessellate>1</tessellate>
						<altitudeMode>relativeToGround</altitudeMode>
						<coordinates>						-99.70482216759588,28.19515287713061,603801.2381810185						 						-99.77804789030529,28.057555796540168,595573.616913497						</coordinates>
					</LineString>
				</Placemark>
				<Placemark>
					<TimeSpan>
						<begin>2015-08-12</begin>
						<end></end>
					</TimeSpan>
					<styleUrl>branch_style3</styleUrl>
					<LineString>
						<tessellate>1</tessellate>
						<altitudeMode>relativeToGround</altitudeMode>
						<coordinates>						-99.77804789030529,28.057555796540168,595573.616913497						 						-99.85138733067446,27.91995940861612,586815.1813706513						</coordinates>
					</LineString>
				</Placemark>
				<Placemark>
					<TimeSpan>
						<begin>2015-08-15</begin>
						<end></end>
					</TimeSpan>
					<styleUrl>branch_style3</styleUrl>
					<LineString>
						<tessellate>1</tessellate>
						<altitudeMode>relativeToGround</altitudeMode>
						<coordinates>						-99.85138733067446,27.91995940861612,586815.1813706513						 						-99.92483960910907,27.78236373073146,577525.9315524818						</coordinates>
					</LineString>
				</Placemark>
				<Placemark>
					<TimeSpan>
						<begin>2015-08-18</begin>
						<end></end>
					</TimeSpan>
					<styleUrl>branch_style3</styleUrl>
					<LineString>
						<tessellate>1</tessellate>
						<altitudeMode>relativeToGround</altitudeMode>
						<coordinates>						-99.92483960910907,27.78236373073146,577525.9315524818						 						-99.99840384624866,27.6447687812992,567705.8674589882						</coordinates>
					</LineString>
				</Placemark>
				<Placemark>
					<TimeSpan>
						<begin>2015-08-21</begin>
						<end></end>
					</TimeSpan>
					<styleUrl>branch_style3</styleUrl>
					<LineString>
						<tessellate>1</tessellate>
						<altitudeMode>relativeToGround</altitudeMode>
						<coordinates>						-99.99840384624866,27.6447687812992,567705.8674589882						 						-100.07207916321872,27.507174579873144,557354.9890901707						</coordinates>
					</LineString>
				</Placemark>
				<Placemark>
					<TimeSpan>
						<begin>2015-08-24</begin>
						<end></end>
					</TimeSpan>
					<styleUrl>branch_style3</styleUrl>
					<LineString>
						<tessellate>1</tessellate>
						<altitudeMode>relativeToGround</altitudeMode>
						<coordinates>						-100.07207916321872,27.507174579873144,557354.9890901707						 						-100.1458646819118,27.36958114726217,546473.2964460296						</coordinates>
					</LineString>
				</Placemark>
				<Placemark>
					<TimeSpan>
						<begin>2015-08-27</begin>
						<end></end>
					</TimeSpan>
					<styleUrl>branch_style3</styleUrl>
					<LineString>
						<tessellate>1</tessellate>
						<altitudeMode>relativeToGround</altitudeMode>
						<coordinates>						-100.1458646819118,27.36958114726217,546473.2964460296						 						-100.21975952530225,27.231988505660212,535060.7895265641						</coordinates>
					</LineString>
				</Placemark>
				<Placemark>
					<TimeSpan>
						<begin>2015-08-30</begin>
						<end></end>
					</TimeSpan>
					<styleUrl>branch_style3</styleUrl>
					<LineString>
						<tessellate>1</tessellate>
						<altitudeMode>relativeToGround</altitudeMode>
						<coordinates>						-100.21975952530225,27.231988505660212,535060.7895265641						 						-100.29376281780111,27.09439667879485,523117.4683317747						</coordinates>
					</LineString>
				</Placemark>
				<Placemark>
					<TimeSpan>
						<begin>2015-09-01</begin>
						<end></end>
					</TimeSpan>
					<styleUrl>branch_style3</styleUrl>
					<LineString>
						<tessellate>1</tessellate>
						<altitudeMode>relativeToGround</altitudeMode>
						<coordinates>						-100.29376281780111,27.09439667879485,523117.4683317747						 						-100.3678736856578,26.95680569209794,510643.33286166145						</coordinates>
					</LineString>
				</Placemark>
				<Placemark>
					<TimeSpan>
						<begin>2015-09-04</begin>
						<end></end>
					</TimeSpan>
					<styleUrl>branch_style3</styleUrl>
					<LineString>
						<tessellate>1</tessellate>
						<altitudeMode>relativeToGround</altitudeMode>
						<coordinates>						-100.3678736856578,26.95680569209794,510643.33286166145						 						-100.44209125741833,26.819215572902454,497638.3831162241						</coordinates>
					</LineString>
				</Placemark>
				<Placemark>
					<TimeSpan>
						<begin>2015-09-07</begin>
						<end></end>
					</TimeSpan>
					<styleUrl>branch_style3</styleUrl>
					<LineString>
						<tessellate>1</tessellate>
						<altitudeMode>relativeToGround</altitudeMode>
						<coordinates>						-100.44209125741833,26.819215572902454,497638.3831162241						 						-100.51641466445092,26.68162635067091,484102.6190954626						</coordinates>
					</LineString>
				</Placemark>
				<Placemark>
					<TimeSpan>
						<begin>2015-09-10</begin>
						<end></end>
					</TimeSpan>
					<styleUrl>branch_style3</styleUrl>
					<LineString>
						<tessellate>1</tessellate>
						<altitudeMode>relativeToGround</altitudeMode>
						<coordinates>						-100.51641466445092,26.68162635067091,484102.6190954626						 						-100.59084304155331,26.54403805726178,470036.0407993775						</coordinates>
					</LineString>
				</Placemark>
				<Placemark>
					<TimeSpan>
						<begin>2015-09-13</begin>
						<end></end>
					</TimeSpan>
					<styleUrl>branch_style3</styleUrl>
					<LineString>
						<tessellate>1</tessellate>
						<altitudeMode>relativeToGround</altitudeMode>
						<coordinates>						-100.59084304155331,26.54403805726178,470036.0407993775						 						-100.66537552765911,26.406450727242316,455438.64822796825						</coordinates>
					</LineString>
				</Placemark>
				<Placemark>
					<TimeSpan>
						<begin>2015-09-16</begin>
						<end></end>
					</TimeSpan>
					<styleUrl>branch_style3</styleUrl>
					<LineString>
						<tessellate>1</tessellate>
						<altitudeMode>relativeToGround</altitudeMode>
						<coordinates>						-100.66537552765911,26.406450727242316,455438.64822796825						 						-100.74001126666631,26.268864398258295,440310.4413812349						</coordinates>
					</LineString>
				</Placemark>
				<Placemark>
					<TimeSpan>
						<begin>2015-09-19</begin>
						<end></end>
					</TimeSpan>
					<styleUrl>branch_style3</styleUrl>
					<LineString>
						<tessellate>1</tessellate>
						<altitudeMode>relativeToGround</altitudeMode>
						<coordinates>						-100.74001126666631,26.268864398258295,440310.4413812349						 						-100.81474940841632,26.13127911147412,424651.4202591777						</coordinates>
					</LineString>
				</Placemark>
				<Placemark>
					<TimeSpan>
						<begin>2015-09-22</begin>
						<end></end>
					</TimeSpan>
					<styleUrl>branch_style3</styleUrl>
					<LineString>
						<tessellate>1</tessellate>
						<altitudeMode>relativeToGround</altitudeMode>
						<coordinates>						-100.81474940841632,26.13127911147412,424651.4202591777						 						-100.88958910986177,25.99369491210107,408461.5848617966						</coordinates>
					</LineString>
				</Placemark>
				<Placemark>
					<TimeSpan>
						<begin>2015-09-25</begin>
						<end></end>
					</TimeSpan>
					<styleUrl>branch_style3</styleUrl>
					<LineString>
						<tessellate>1</tessellate>
						<altitudeMode>relativeToGround</altitudeMode>
						<coordinates>						-100.88958910986177,25.99369491210107,408461.5848617966						 						-100.9645295364723,25.856111850036694,391740.93518909137						</coordinates>
					</LineString>
				</Placemark>
				<Placemark>
					<TimeSpan>
						<begin>2015-09-27</begin>
						<end></end>
					</TimeSpan>
					<styleUrl>branch_style3</styleUrl>
					<LineString>
						<tessellate>1</tessellate>
						<altitudeMode>relativeToGround</altitudeMode>
						<coordinates>						-100.9645295364723,25.856111850036694,391740.93518909137						 						-101.03956986394469,25.718529980646437,374489.4712410623						</coordinates>
					</LineString>
				</Placemark>
				<Placemark>
					<TimeSpan>
						<begin>2015-09-30</begin>
						<end></end>
					</TimeSpan>
					<styleUrl>branch_style3</styleUrl>
					<LineString>
						<tessellate>1</tessellate>
						<altitudeMode>relativeToGround</altitudeMode>
						<coordinates>						-101.03956986394469,25.718529980646437,374489.4712410623						 						-101.1147092803063,25.580949365729158,356707.19301770907						</coordinates>
					</LineString>
				</Placemark>
				<Placemark>
					<TimeSpan>
						<begin>2015-10-03</begin>
						<end></end>
					</TimeSpan>
					<styleUrl>branch_style3</styleUrl>
					<LineString>
						<tessellate>1</tessellate>
						<altitudeMode>relativeToGround</altitudeMode>
						<coordinates>						-101.1147092803063,25.580949365729158,356707.19301770907						 						-101.18994698853554,25.443370074724086,338394.100519032						</coordinates>
					</LineString>
				</Placemark>
				<Placemark>
					<TimeSpan>
						<begin>2015-10-06</begin>
						<end></end>
					</TimeSpan>
					<styleUrl>branch_style3</styleUrl>
					<LineString>
						<tessellate>1</tessellate>
						<altitudeMode>relativeToGround</altitudeMode>
						<coordinates>						-101.18994698853554,25.443370074724086,338394.100519032						 						-101.26528220987068,25.30579218623978,319550.193745031						</coordinates>
					</LineString>
				</Placemark>
				<Placemark>
					<TimeSpan>
						<begin>2015-10-09</begin>
						<end></end>
					</TimeSpan>
					<styleUrl>branch_style3</styleUrl>
					<LineString>
						<tessellate>1</tessellate>
						<altitudeMode>relativeToGround</altitudeMode>
						<coordinates>						-101.26528220987068,25.30579218623978,319550.193745031						 						-101.3407141880532,25.16821579002,300175.47269570595						</coordinates>
					</LineString>
				</Placemark>
				<Placemark>
					<TimeSpan>
						<begin>2015-10-12</begin>
						<end></end>
					</TimeSpan>
					<styleUrl>branch_style3</styleUrl>
					<LineString>
						<tessellate>1</tessellate>
						<altitudeMode>relativeToGround</altitudeMode>
						<coordinates>						-101.3407141880532,25.16821579002,300175.47269570595						 						-101.41624219486505,25.030640989514612,280269.937371057						</coordinates>
					</LineString>
				</Placemark>
				<Placemark>
					<TimeSpan>
						<begin>2015-10-15</begin>
						<end></end>
					</TimeSpan>
					<styleUrl>branch_style3</styleUrl>
					<LineString>
						<tessellate>1</tessellate>
						<altitudeMode>relativeToGround</altitudeMode>
						<coordinates>						-101.41624219486505,25.030640989514612,280269.937371057						 						-101.49186553749824,24.893067905307728,259833.58777108416						</coordinates>
					</LineString>
				</Placemark>
				<Placemark>
					<TimeSpan>
						<begin>2015-10-18</begin>
						<end></end>
					</TimeSpan>
					<styleUrl>branch_style3</styleUrl>
					<LineString>
						<tessellate>1</tessellate>
						<altitudeMode>relativeToGround</altitudeMode>
						<coordinates>						-101.49186553749824,24.893067905307728,259833.58777108416						 						-101.56758356858973,24.75549667979273,238866.42389578745						</coordinates>
					</LineString>
				</Placemark>
				<Placemark>
					<TimeSpan>
						<begin>2015-10-21</begin>
						<end></end>
					</TimeSpan>
					<styleUrl>branch_style3</styleUrl>
					<LineString>
						<tessellate>1</tessellate>
						<altitudeMode>relativeToGround</altitudeMode>
						<coordinates>						-101.56758356858973,24.75549667979273,238866.42389578745						 						-101.64339570025307,24.617927483717786,217368.44574516686						</coordinates>
					</LineString>
				</Placemark>
				<Placemark>
					<TimeSpan>
						<begin>2015-10-23</begin>
						<end></end>
					</TimeSpan>
					<styleUrl>branch_style3</styleUrl>
					<LineString>
						<tessellate>1</tessellate>
						<altitudeMode>relativeToGround</altitudeMode>
						<coordinates>						-101.64339570025307,24.617927483717786,217368.44574516686						 						-101.71930142432726,24.4803605256412,195339.65331922192						</coordinates>
					</LineString>
				</Placemark>
				<Placemark>
					<TimeSpan>
						<begin>2015-10-26</begin>
						<end></end>
					</TimeSpan>
					<styleUrl>branch_style3</styleUrl>
					<LineString>
						<tessellate>1</tessellate>
						<altitudeMode>relativeToGround</altitudeMode>
						<coordinates>						-101.71930142432726,24.4803605256412,195339.65331922192						 						-101.79530034272587,24.34279606611573,172780.0466179531						</coordinates>
					</LineString>
				</Placemark>
				<Placemark>
					<TimeSpan>
						<begin>2015-10-29</begin>
						<end></end>
					</TimeSpan>
					<styleUrl>branch_style3</styleUrl>
					<LineString>
						<tessellate>1</tessellate>
						<altitudeMode>relativeToGround</altitudeMode>
						<coordinates>						-101.79530034272587,24.34279606611573,172780.0466179531						 						-101.87139221509916,24.205234439980178,149689.62564135995						</coordinates>
					</LineString>
				</Placemark>
				<Placemark>
					<TimeSpan>
						<begin>2015-11-01</begin>
						<end></end>
					</TimeSpan>
					<styleUrl>branch_style3</styleUrl>
					<LineString>
						<tessellate>1</tessellate>
						<altitudeMode>relativeToGround</altitudeMode>
						<coordinates>						-101.87139221509916,24.205234439980178,149689.62564135995						 						-101.94757703823193,24.067676093515843,126068.39038944338						</coordinates>
					</LineString>
				</Placemark>
				<Placemark>
					<TimeSpan>
						<begin>2015-11-04</begin>
						<end></end>
					</TimeSpan>
					<styleUrl>branch_style3</styleUrl>
					<LineString>
						<tessellate>1</tessellate>
						<altitudeMode>relativeToGround</altitudeMode>
						<coordinates>						-101.94757703823193,24.067676093515843,126068.39038944338						 						-102.02385518890318,23.930121651335828,101916.34086220246						</coordinates>
					</LineString>
				</Placemark>
				<Placemark>
					<TimeSpan>
						<begin>2015-11-07</begin>
						<end></end>
					</TimeSpan>
					<styleUrl>branch_style3</styleUrl>
					<LineString>
						<tessellate>1</tessellate>
						<altitudeMode>relativeToGround</altitudeMode>
						<coordinates>						-102.02385518890318,23.930121651335828,101916.34086220246						 						-102.10022770951474,23.79257205018052,77233.47705963766						</coordinates>
					</LineString>
				</Placemark>
				<Placemark>
					<TimeSpan>
						<begin>2015-11-10</begin>
						<end></end>
					</TimeSpan>
					<styleUrl>branch_style3</styleUrl>
					<LineString>
						<tessellate>1</tessellate>
						<altitudeMode>relativeToGround</altitudeMode>
						<coordinates>						-102.10022770951474,23.79257205018052,77233.47705963766						 						-102.17669697438411,23.655028851152785,52019.79898174899						</coordinates>
					</LineString>
				</Placemark>
				<Placemark>
					<TimeSpan>
						<begin>2015-11-13</begin>
						<end></end>
					</TimeSpan>
					<styleUrl>branch_style3</styleUrl>
					<LineString>
						<tessellate>1</tessellate>
						<altitudeMode>relativeToGround</altitudeMode>
						<coordinates>						-102.17669697438411,23.655028851152785,52019.79898174899						 						-102.25326868818388,23.5174951765834,26275.306628536433						</coordinates>
					</LineString>
				</Placemark>
				<Placemark>
					<TimeSpan>
						<begin>2015-11-16</begin>
						<end></end>
					</TimeSpan>
					<styleUrl>branch_style3</styleUrl>
					<LineString>
						<tessellate>1</tessellate>
						<altitudeMode>relativeToGround</altitudeMode>
						<coordinates>						-102.25326868818388,23.5174951765834,26275.306628536433						 						-102.33000183105469,23.3799991607666,-4.6566128730773926E-10						</coordinates>
					</LineString>
				</Placemark>
			</Folder>
			<Folder>
				<name>US:Korea</name>
				<Placemark>
					<TimeSpan>
						<begin>2015-05-26</begin>
						<end></end>
					</TimeSpan>
					<styleUrl>branch_style4</styleUrl>
					<LineString>
						<tessellate>1</tessellate>
						<altitudeMode>relativeToGround</altitudeMode>
						<coordinates>						-95.2300033569336,37.13999938964844,0.0						 						-96.60421180619151,37.134620703150205,190558.3065822941						</coordinates>
					</LineString>
				</Placemark>
				<Placemark>
					<TimeSpan>
						<begin>2015-05-28</begin>
						<end></end>
					</TimeSpan>
					<styleUrl>branch_style4</styleUrl>
					<LineString>
						<tessellate>1</tessellate>
						<altitudeMode>relativeToGround</altitudeMode>
						<coordinates>						-96.60421180619151,37.134620703150205,190558.3065822941						 						-97.97844494627071,37.12932282908825,377266.95040534995						</coordinates>
					</LineString>
				</Placemark>
				<Placemark>
					<TimeSpan>
						<begin>2015-05-30</begin>
						<end></end>
					</TimeSpan>
					<styleUrl>branch_style4</styleUrl>
					<LineString>
						<tessellate>1</tessellate>
						<altitudeMode>relativeToGround</altitudeMode>
						<coordinates>						-97.97844494627071,37.12932282908825,377266.95040534995						 						-99.35270130077753,37.124106560532226,560125.9314691676						</coordinates>
					</LineString>
				</Placemark>
				<Placemark>
					<TimeSpan>
						<begin>2015-06-01</begin>
						<end></end>
					</TimeSpan>
					<styleUrl>branch_style4</styleUrl>
					<LineString>
						<tessellate>1</tessellate>
						<altitudeMode>relativeToGround</altitudeMode>
						<coordinates>						-99.35270130077753,37.124106560532226,560125.9314691676						 						-100.72697937998218,37.1189727070367,739135.2497737468						</coordinates>
					</LineString>
				</Placemark>
				<Placemark>
					<TimeSpan>
						<begin>2015-06-02</begin>
						<end></end>
					</TimeSpan>
					<styleUrl>branch_style4</styleUrl>
					<LineString>
						<tessellate>1</tessellate>
						<altitudeMode>relativeToGround</altitudeMode>
						<coordinates>						-100.72697937998218,37.1189727070367,739135.2497737468						 						-102.10127768050518,37.11392209515796,914294.9053190879						</coordinates>
					</LineString>
				</Placemark>
				<Placemark>
					<TimeSpan>
						<begin>2015-06-04</begin>
						<end></end>
					</TimeSpan>
					<styleUrl>branch_style4</styleUrl>
					<LineString>
						<tessellate>1</tessellate>
						<altitudeMode>relativeToGround</altitudeMode>
						<coordinates>						-102.10127768050518,37.11392209515796,914294.9053190879						 						-103.47559468499409,37.10895556899263,1085604.8981051908						</coordinates>
					</LineString>
				</Placemark>
				<Placemark>
					<TimeSpan>
						<begin>2015-06-06</begin>
						<end></end>
					</TimeSpan>
					<styleUrl>branch_style4</styleUrl>
					<LineString>
						<tessellate>1</tessellate>
						<altitudeMode>relativeToGround</altitudeMode>
						<coordinates>						-103.47559468499409,37.10895556899263,1085604.8981051908						 						-104.84992886178968,37.10407399073914,1253065.2281320551						</coordinates>
					</LineString>
				</Placemark>
				<Placemark>
					<TimeSpan>
						<begin>2015-06-08</begin>
						<end></end>
					</TimeSpan>
					<styleUrl>branch_style4</styleUrl>
					<LineString>
						<tessellate>1</tessellate>
						<altitudeMode>relativeToGround</altitudeMode>
						<coordinates>						-104.84992886178968,37.10407399073914,1253065.2281320551						 						-106.2242786645807,37.09927824128351,1416675.8953996815						</coordinates>
					</LineString>
				</Placemark>
				<Placemark>
					<TimeSpan>
						<begin>2015-06-09</begin>
						<end></end>
					</TimeSpan>
					<styleUrl>branch_style4</styleUrl>
					<LineString>
						<tessellate>1</tessellate>
						<altitudeMode>relativeToGround</altitudeMode>
						<coordinates>						-106.2242786645807,37.09927824128351,1416675.8953996815						 						-107.59864253204746,37.094569220810506,1576436.8999080695						</coordinates>
					</LineString>
				</Placemark>
				<Placemark>
					<TimeSpan>
						<begin>2015-06-11</begin>
						<end></end>
					</TimeSpan>
					<styleUrl>branch_style4</styleUrl>
					<LineString>
						<tessellate>1</tessellate>
						<altitudeMode>relativeToGround</altitudeMode>
						<coordinates>						-107.59864253204746,37.094569220810506,1576436.8999080695						 						-108.9730188874937,37.089947849441785,1732348.2416572194						</coordinates>
					</LineString>
				</Placemark>
				<Placemark>
					<TimeSpan>
						<begin>2015-06-13</begin>
						<end></end>
					</TimeSpan>
					<styleUrl>branch_style4</styleUrl>
					<LineString>
						<tessellate>1</tessellate>
						<altitudeMode>relativeToGround</altitudeMode>
						<coordinates>						-108.9730188874937,37.089947849441785,1732348.2416572194						 						-110.34740613846503,37.0854150679024,1884409.9206471306						</coordinates>
					</LineString>
				</Placemark>
				<Placemark>
					<TimeSpan>
						<begin>2015-06-15</begin>
						<end></end>
					</TimeSpan>
					<styleUrl>branch_style4</styleUrl>
					<LineString>
						<tessellate>1</tessellate>
						<altitudeMode>relativeToGround</altitudeMode>
						<coordinates>						-110.34740613846503,37.0854150679024,1884409.9206471306						 						-111.72180267635501,37.080971838217245,2032621.9368778039						</coordinates>
					</LineString>
				</Placemark>
				<Placemark>
					<TimeSpan>
						<begin>2015-06-16</begin>
						<end></end>
					</TimeSpan>
					<styleUrl>branch_style4</styleUrl>
					<LineString>
						<tessellate>1</tessellate>
						<altitudeMode>relativeToGround</altitudeMode>
						<coordinates>						-111.72180267635501,37.080971838217245,2032621.9368778039						 						-113.09620687599711,37.076619144439256,2176984.290349239						</coordinates>
					</LineString>
				</Placemark>
				<Placemark>
					<TimeSpan>
						<begin>2015-06-18</begin>
						<end></end>
					</TimeSpan>
					<styleUrl>branch_style4</styleUrl>
					<LineString>
						<tessellate>1</tessellate>
						<altitudeMode>relativeToGround</altitudeMode>
						<coordinates>						-113.09620687599711,37.076619144439256,2176984.290349239						 						-114.47061709524232,37.07235799341112,2317496.9810614353						</coordinates>
					</LineString>
				</Placemark>
				<Placemark>
					<TimeSpan>
						<begin>2015-06-20</begin>
						<end></end>
					</TimeSpan>
					<styleUrl>branch_style4</styleUrl>
					<LineString>
						<tessellate>1</tessellate>
						<altitudeMode>relativeToGround</altitudeMode>
						<coordinates>						-114.47061709524232,37.07235799341112,2317496.9810614353						 						-115.8450316745221,37.06818941556242,2454160.0090143937						</coordinates>
					</LineString>
				</Placemark>
				<Placemark>
					<TimeSpan>
						<begin>2015-06-22</begin>
						<end></end>
					</TimeSpan>
					<styleUrl>branch_style4</styleUrl>
					<LineString>
						<tessellate>1</tessellate>
						<altitudeMode>relativeToGround</altitudeMode>
						<coordinates>						-115.8450316745221,37.06818941556242,2454160.0090143937						 						-117.21944893639488,37.064114465744375,2586973.374208114						</coordinates>
					</LineString>
				</Placemark>
				<Placemark>
					<TimeSpan>
						<begin>2015-06-23</begin>
						<end></end>
					</TimeSpan>
					<styleUrl>branch_style4</styleUrl>
					<LineString>
						<tessellate>1</tessellate>
						<altitudeMode>relativeToGround</altitudeMode>
						<coordinates>						-117.21944893639488,37.064114465744375,2586973.374208114						 						-118.59386718507638,37.06013422410429,2715937.076642596						</coordinates>
					</LineString>
				</Placemark>
				<Placemark>
					<TimeSpan>
						<begin>2015-06-25</begin>
						<end></end>
					</TimeSpan>
					<styleUrl>branch_style4</styleUrl>
					<LineString>
						<tessellate>1</tessellate>
						<altitudeMode>relativeToGround</altitudeMode>
						<coordinates>						-118.59386718507638,37.06013422410429,2715937.076642596						 						-119.96828470595261,37.05624979700229,2841051.11631784						</coordinates>
					</LineString>
				</Placemark>
				<Placemark>
					<TimeSpan>
						<begin>2015-06-27</begin>
						<end></end>
					</TimeSpan>
					<styleUrl>branch_style4</styleUrl>
					<LineString>
						<tessellate>1</tessellate>
						<altitudeMode>relativeToGround</altitudeMode>
						<coordinates>						-119.96828470595261,37.05624979700229,2841051.11631784						 						-121.34269976507478,37.05246231797278,2962315.4932338446						</coordinates>
					</LineString>
				</Placemark>
				<Placemark>
					<TimeSpan>
						<begin>2015-06-29</begin>
						<end></end>
					</TimeSpan>
					<styleUrl>branch_style4</styleUrl>
					<LineString>
						<tessellate>1</tessellate>
						<altitudeMode>relativeToGround</altitudeMode>
						<coordinates>						-121.34269976507478,37.05246231797278,2962315.4932338446						 						-122.71711060863453,37.048772948733394,3079730.207390612						</coordinates>
					</LineString>
				</Placemark>
				<Placemark>
					<TimeSpan>
						<begin>2015-06-30</begin>
						<end></end>
					</TimeSpan>
					<styleUrl>branch_style4</styleUrl>
					<LineString>
						<tessellate>1</tessellate>
						<altitudeMode>relativeToGround</altitudeMode>
						<coordinates>						-122.71711060863453,37.048772948733394,3079730.207390612						 						-124.09151546241975,37.04518288024451,3193295.258788141						</coordinates>
					</LineString>
				</Placemark>
				<Placemark>
					<TimeSpan>
						<begin>2015-07-02</begin>
						<end></end>
					</TimeSpan>
					<styleUrl>branch_style4</styleUrl>
					<LineString>
						<tessellate>1</tessellate>
						<altitudeMode>relativeToGround</altitudeMode>
						<coordinates>						-124.09151546241975,37.04518288024451,3193295.258788141						 						-125.46591253124876,37.04169333382238,3303010.647426431						</coordinates>
					</LineString>
				</Placemark>
				<Placemark>
					<TimeSpan>
						<begin>2015-07-04</begin>
						<end></end>
					</TimeSpan>
					<styleUrl>branch_style4</styleUrl>
					<LineString>
						<tessellate>1</tessellate>
						<altitudeMode>relativeToGround</altitudeMode>
						<coordinates>						-125.46591253124876,37.04169333382238,3303010.647426431						 						-126.84029999838262,37.03830556230946,3408876.373305484						</coordinates>
					</LineString>
				</Placemark>
				<Placemark>
					<TimeSpan>
						<begin>2015-07-06</begin>
						<end></end>
					</TimeSpan>
					<styleUrl>branch_style4</styleUrl>
					<LineString>
						<tessellate>1</tessellate>
						<altitudeMode>relativeToGround</altitudeMode>
						<coordinates>						-126.84029999838262,37.03830556230946,3408876.373305484						 						-128.21467602491384,37.03502085130564,3510892.4364252975						</coordinates>
					</LineString>
				</Placemark>
				<Placemark>
					<TimeSpan>
						<begin>2015-07-07</begin>
						<end></end>
					</TimeSpan>
					<styleUrl>branch_style4</styleUrl>
					<LineString>
						<tessellate>1</tessellate>
						<altitudeMode>relativeToGround</altitudeMode>
						<coordinates>						-128.21467602491384,37.03502085130564,3510892.4364252975						 						-129.58903874913028,37.03184052046418,3609058.8367858734						</coordinates>
					</LineString>
				</Placemark>
				<Placemark>
					<TimeSpan>
						<begin>2015-07-09</begin>
						<end></end>
					</TimeSpan>
					<styleUrl>branch_style4</styleUrl>
					<LineString>
						<tessellate>1</tessellate>
						<altitudeMode>relativeToGround</altitudeMode>
						<coordinates>						-129.58903874913028,37.03184052046418,3609058.8367858734						 						-130.9633862858536,37.02876592485696,3703375.5743872114						</coordinates>
					</LineString>
				</Placemark>
				<Placemark>
					<TimeSpan>
						<begin>2015-07-11</begin>
						<end></end>
					</TimeSpan>
					<styleUrl>branch_style4</styleUrl>
					<LineString>
						<tessellate>1</tessellate>
						<altitudeMode>relativeToGround</altitudeMode>
						<coordinates>						-130.9633862858536,37.02876592485696,3703375.5743872114						 						-132.33771672574994,37.0257984564136,3793842.6492293105						</coordinates>
					</LineString>
				</Placemark>
				<Placemark>
					<TimeSpan>
						<begin>2015-07-13</begin>
						<end></end>
					</TimeSpan>
					<styleUrl>branch_style4</styleUrl>
					<LineString>
						<tessellate>1</tessellate>
						<altitudeMode>relativeToGround</altitudeMode>
						<coordinates>						-132.33771672574994,37.0257984564136,3793842.6492293105						 						-133.71202813461122,37.02293954543936,3880460.0613121707						</coordinates>
					</LineString>
				</Placemark>
				<Placemark>
					<TimeSpan>
						<begin>2015-07-14</begin>
						<end></end>
					</TimeSpan>
					<styleUrl>branch_style4</styleUrl>
					<LineString>
						<tessellate>1</tessellate>
						<altitudeMode>relativeToGround</altitudeMode>
						<coordinates>						-133.71202813461122,37.02293954543936,3880460.0613121707						 						-135.0863185526069,37.020190662217644,3963227.810635794						</coordinates>
					</LineString>
				</Placemark>
				<Placemark>
					<TimeSpan>
						<begin>2015-07-16</begin>
						<end></end>
					</TimeSpan>
					<styleUrl>branch_style4</styleUrl>
					<LineString>
						<tessellate>1</tessellate>
						<altitudeMode>relativeToGround</altitudeMode>
						<coordinates>						-135.0863185526069,37.020190662217644,3963227.810635794						 						-136.4605859935026,37.01755331870272,4042145.8972001784						</coordinates>
					</LineString>
				</Placemark>
				<Placemark>
					<TimeSpan>
						<begin>2015-07-18</begin>
						<end></end>
					</TimeSpan>
					<styleUrl>branch_style4</styleUrl>
					<LineString>
						<tessellate>1</tessellate>
						<altitudeMode>relativeToGround</altitudeMode>
						<coordinates>						-136.4605859935026,37.01755331870272,4042145.8972001784						 						-137.8348284438447,37.01502907030927,4117214.321005325						</coordinates>
					</LineString>
				</Placemark>
				<Placemark>
					<TimeSpan>
						<begin>2015-07-20</begin>
						<end></end>
					</TimeSpan>
					<styleUrl>branch_style4</styleUrl>
					<LineString>
						<tessellate>1</tessellate>
						<altitudeMode>relativeToGround</altitudeMode>
						<coordinates>						-137.8348284438447,37.01502907030927,4117214.321005325						 						-139.2090438621091,37.012619517805824,4188433.0820512325						</coordinates>
					</LineString>
				</Placemark>
				<Placemark>
					<TimeSpan>
						<begin>2015-07-21</begin>
						<end></end>
					</TimeSpan>
					<styleUrl>branch_style4</styleUrl>
					<LineString>
						<tessellate>1</tessellate>
						<altitudeMode>relativeToGround</altitudeMode>
						<coordinates>						-139.2090438621091,37.012619517805824,4188433.0820512325						 						-140.58323017781083,37.01032630931963,4255802.180337902						</coordinates>
					</LineString>
				</Placemark>
				<Placemark>
					<TimeSpan>
						<begin>2015-07-23</begin>
						<end></end>
					</TimeSpan>
					<styleUrl>branch_style4</styleUrl>
					<LineString>
						<tessellate>1</tessellate>
						<altitudeMode>relativeToGround</altitudeMode>
						<coordinates>						-140.58323017781083,37.01032630931963,4255802.180337902						 						-141.957385290574,37.00815114246131,4319321.615865334						</coordinates>
					</LineString>
				</Placemark>
				<Placemark>
					<TimeSpan>
						<begin>2015-07-25</begin>
						<end></end>
					</TimeSpan>
					<styleUrl>branch_style4</styleUrl>
					<LineString>
						<tessellate>1</tessellate>
						<altitudeMode>relativeToGround</altitudeMode>
						<coordinates>						-141.957385290574,37.00815114246131,4319321.615865334						 						-143.3315070691574,37.006095766578404,4378991.388633527						</coordinates>
					</LineString>
				</Placemark>
				<Placemark>
					<TimeSpan>
						<begin>2015-07-27</begin>
						<end></end>
					</TimeSpan>
					<styleUrl>branch_style4</styleUrl>
					<LineString>
						<tessellate>1</tessellate>
						<altitudeMode>relativeToGround</altitudeMode>
						<coordinates>						-143.3315070691574,37.006095766578404,4378991.388633527						 						-144.70559335043512,37.00416198514765,4434811.498642482						</coordinates>
					</LineString>
				</Placemark>
				<Placemark>
					<TimeSpan>
						<begin>2015-07-28</begin>
						<end></end>
					</TimeSpan>
					<styleUrl>branch_style4</styleUrl>
					<LineString>
						<tessellate>1</tessellate>
						<altitudeMode>relativeToGround</altitudeMode>
						<coordinates>						-144.70559335043512,37.00416198514765,4434811.498642482						 						-146.07964193832765,37.00235165831698,4486781.945892198						</coordinates>
					</LineString>
				</Placemark>
				<Placemark>
					<TimeSpan>
						<begin>2015-07-30</begin>
						<end></end>
					</TimeSpan>
					<styleUrl>branch_style4</styleUrl>
					<LineString>
						<tessellate>1</tessellate>
						<altitudeMode>relativeToGround</altitudeMode>
						<coordinates>						-146.07964193832765,37.00235165831698,4486781.945892198						 						-147.45365060268153,37.00066670560904,4534902.730382676						</coordinates>
					</LineString>
				</Placemark>
				<Placemark>
					<TimeSpan>
						<begin>2015-08-01</begin>
						<end></end>
					</TimeSpan>
					<styleUrl>branch_style4</styleUrl>
					<LineString>
						<tessellate>1</tessellate>
						<altitudeMode>relativeToGround</altitudeMode>
						<coordinates>						-147.45365060268153,37.00066670560904,4534902.730382676						 						-148.82761707809303,36.999109108799146,4579173.8521139175						</coordinates>
					</LineString>
				</Placemark>
				<Placemark>
					<TimeSpan>
						<begin>2015-08-03</begin>
						<end></end>
					</TimeSpan>
					<styleUrl>branch_style4</styleUrl>
					<LineString>
						<tessellate>1</tessellate>
						<altitudeMode>relativeToGround</altitudeMode>
						<coordinates>						-148.82761707809303,36.999109108799146,4579173.8521139175						 						-150.20153906267322,36.99768091498214,4619595.311085918						</coordinates>
					</LineString>
				</Placemark>
				<Placemark>
					<TimeSpan>
						<begin>2015-08-04</begin>
						<end></end>
					</TimeSpan>
					<styleUrl>branch_style4</styleUrl>
					<LineString>
						<tessellate>1</tessellate>
						<altitudeMode>relativeToGround</altitudeMode>
						<coordinates>						-150.20153906267322,36.99768091498214,4619595.311085918						 						-151.57541421674955,36.996384239844,4656167.1072986815						</coordinates>
					</LineString>
				</Placemark>
				<Placemark>
					<TimeSpan>
						<begin>2015-08-06</begin>
						<end></end>
					</TimeSpan>
					<styleUrl>branch_style4</styleUrl>
					<LineString>
						<tessellate>1</tessellate>
						<altitudeMode>relativeToGround</altitudeMode>
						<coordinates>						-151.57541421674955,36.996384239844,4656167.1072986815						 						-152.94924016149986,36.995221271155174,4688889.240752207						</coordinates>
					</LineString>
				</Placemark>
				<Placemark>
					<TimeSpan>
						<begin>2015-08-08</begin>
						<end></end>
					</TimeSpan>
					<styleUrl>branch_style4</styleUrl>
					<LineString>
						<tessellate>1</tessellate>
						<altitudeMode>relativeToGround</altitudeMode>
						<coordinates>						-152.94924016149986,36.995221271155174,4688889.240752207						 						-154.32301447751487,36.994194272505226,4717761.711446494						</coordinates>
					</LineString>
				</Placemark>
				<Placemark>
					<TimeSpan>
						<begin>2015-08-10</begin>
						<end></end>
					</TimeSpan>
					<styleUrl>branch_style4</styleUrl>
					<LineString>
						<tessellate>1</tessellate>
						<altitudeMode>relativeToGround</altitudeMode>
						<coordinates>						-154.32301447751487,36.994194272505226,4717761.711446494						 						-155.69673470328232,36.99330558729953,4742784.519381542						</coordinates>
					</LineString>
				</Placemark>
				<Placemark>
					<TimeSpan>
						<begin>2015-08-11</begin>
						<end></end>
					</TimeSpan>
					<styleUrl>branch_style4</styleUrl>
					<LineString>
						<tessellate>1</tessellate>
						<altitudeMode>relativeToGround</altitudeMode>
						<coordinates>						-155.69673470328232,36.99330558729953,4742784.519381542						 						-157.0703983335885,36.99255764304182,4763957.664557353						</coordinates>
					</LineString>
				</Placemark>
				<Placemark>
					<TimeSpan>
						<begin>2015-08-13</begin>
						<end></end>
					</TimeSpan>
					<styleUrl>branch_style4</styleUrl>
					<LineString>
						<tessellate>1</tessellate>
						<altitudeMode>relativeToGround</altitudeMode>
						<coordinates>						-157.0703983335885,36.99255764304182,4763957.664557353						 						-158.4440028178309,36.99195295592831,4781281.146973927						</coordinates>
					</LineString>
				</Placemark>
				<Placemark>
					<TimeSpan>
						<begin>2015-08-15</begin>
						<end></end>
					</TimeSpan>
					<styleUrl>branch_style4</styleUrl>
					<LineString>
						<tessellate>1</tessellate>
						<altitudeMode>relativeToGround</altitudeMode>
						<coordinates>						-158.4440028178309,36.99195295592831,4781281.146973927						 						-159.81754555823392,36.99149413578234,4794754.96663126						</coordinates>
					</LineString>
				</Placemark>
				<Placemark>
					<TimeSpan>
						<begin>2015-08-17</begin>
						<end></end>
					</TimeSpan>
					<styleUrl>branch_style4</styleUrl>
					<LineString>
						<tessellate>1</tessellate>
						<altitudeMode>relativeToGround</altitudeMode>
						<coordinates>						-159.81754555823392,36.99149413578234,4794754.96663126						 						-161.19102390796274,36.9911838913617,4804379.123529355						</coordinates>
					</LineString>
				</Placemark>
				<Placemark>
					<TimeSpan>
						<begin>2015-08-18</begin>
						<end></end>
					</TimeSpan>
					<styleUrl>branch_style4</styleUrl>
					<LineString>
						<tessellate>1</tessellate>
						<altitudeMode>relativeToGround</altitudeMode>
						<coordinates>						-161.19102390796274,36.9911838913617,4804379.123529355						 						-162.56443516912412,36.9910250360745,4810153.617668212						</coordinates>
					</LineString>
				</Placemark>
				<Placemark>
					<TimeSpan>
						<begin>2015-08-20</begin>
						<end></end>
					</TimeSpan>
					<styleUrl>branch_style4</styleUrl>
					<LineString>
						<tessellate>1</tessellate>
						<altitudeMode>relativeToGround</altitudeMode>
						<coordinates>						-162.56443516912412,36.9910250360745,4810153.617668212						 						-163.9377765906478,36.99102049414351,4812078.449047831						</coordinates>
					</LineString>
				</Placemark>
				<Placemark>
					<TimeSpan>
						<begin>2015-08-22</begin>
						<end></end>
					</TimeSpan>
					<styleUrl>branch_style4</styleUrl>
					<LineString>
						<tessellate>1</tessellate>
						<altitudeMode>relativeToGround</altitudeMode>
						<coordinates>						-163.9377765906478,36.99102049414351,4812078.449047831						 						-165.31104536603732,36.991173307264134,4810153.617668213						</coordinates>
					</LineString>
				</Placemark>
				<Placemark>
					<TimeSpan>
						<begin>2015-08-24</begin>
						<end></end>
					</TimeSpan>
					<styleUrl>branch_style4</styleUrl>
					<LineString>
						<tessellate>1</tessellate>
						<altitudeMode>relativeToGround</altitudeMode>
						<coordinates>						-165.31104536603732,36.991173307264134,4810153.617668213						 						-166.68423863098045,36.99148664180597,4804379.123529356						</coordinates>
					</LineString>
				</Placemark>
				<Placemark>
					<TimeSpan>
						<begin>2015-08-25</begin>
						<end></end>
					</TimeSpan>
					<styleUrl>branch_style4</styleUrl>
					<LineString>
						<tessellate>1</tessellate>
						<altitudeMode>relativeToGround</altitudeMode>
						<coordinates>						-166.68423863098045,36.99148664180597,4804379.123529356						 						-168.0573534608047,36.99196379661504,4794754.96663126						</coordinates>
					</LineString>
				</Placemark>
				<Placemark>
					<TimeSpan>
						<begin>2015-08-27</begin>
						<end></end>
					</TimeSpan>
					<styleUrl>branch_style4</styleUrl>
					<LineString>
						<tessellate>1</tessellate>
						<altitudeMode>relativeToGround</altitudeMode>
						<coordinates>						-168.0573534608047,36.99196379661504,4794754.96663126						 						-169.43038686776822,36.99260821148028,4781281.146973926						</coordinates>
					</LineString>
				</Placemark>
				<Placemark>
					<TimeSpan>
						<begin>2015-08-29</begin>
						<end></end>
					</TimeSpan>
					<styleUrl>branch_style4</styleUrl>
					<LineString>
						<tessellate>1</tessellate>
						<altitudeMode>relativeToGround</altitudeMode>
						<coordinates>						-169.43038686776822,36.99260821148028,4781281.146973926						 						-170.80333579816852,36.9934234763368,4763957.664557353						</coordinates>
					</LineString>
				</Placemark>
				<Placemark>
					<TimeSpan>
						<begin>2015-08-31</begin>
						<end></end>
					</TimeSpan>
					<styleUrl>branch_style4</styleUrl>
					<LineString>
						<tessellate>1</tessellate>
						<altitudeMode>relativeToGround</altitudeMode>
						<coordinates>						-170.80333579816852,36.9934234763368,4763957.664557353						 						-172.17619712925332,36.994413341287455,4742784.519381542						</coordinates>
					</LineString>
				</Placemark>
				<Placemark>
					<TimeSpan>
						<begin>2015-09-01</begin>
						<end></end>
					</TimeSpan>
					<styleUrl>branch_style4</styleUrl>
					<LineString>
						<tessellate>1</tessellate>
						<altitudeMode>relativeToGround</altitudeMode>
						<coordinates>						-172.17619712925332,36.994413341287455,4742784.519381542						 						-173.5489676659156,36.995581727536134,4717761.711446495						</coordinates>
					</LineString>
				</Placemark>
				<Placemark>
					<TimeSpan>
						<begin>2015-09-03</begin>
						<end></end>
					</TimeSpan>
					<styleUrl>branch_style4</styleUrl>
					<LineString>
						<tessellate>1</tessellate>
						<altitudeMode>relativeToGround</altitudeMode>
						<coordinates>						-173.5489676659156,36.995581727536134,4717761.711446495						 						-174.92164413715065,36.99693273933846,4688889.240752207						</coordinates>
					</LineString>
				</Placemark>
				<Placemark>
					<TimeSpan>
						<begin>2015-09-05</begin>
						<end></end>
					</TimeSpan>
					<styleUrl>branch_style4</styleUrl>
					<LineString>
						<tessellate>1</tessellate>
						<altitudeMode>relativeToGround</altitudeMode>
						<coordinates>						-174.92164413715065,36.99693273933846,4688889.240752207						 						-176.29422319225463,36.99847067709135,4656167.1072986815						</coordinates>
					</LineString>
				</Placemark>
				<Placemark>
					<TimeSpan>
						<begin>2015-09-07</begin>
						<end></end>
					</TimeSpan>
					<styleUrl>branch_style4</styleUrl>
					<LineString>
						<tessellate>1</tessellate>
						<altitudeMode>relativeToGround</altitudeMode>
						<coordinates>						-176.29422319225463,36.99847067709135,4656167.1072986815						 						-177.66670139673573,37.000200051700126,4619595.311085918						</coordinates>
					</LineString>
				</Placemark>
				<Placemark>
					<TimeSpan>
						<begin>2015-09-08</begin>
						<end></end>
					</TimeSpan>
					<styleUrl>branch_style4</styleUrl>
					<LineString>
						<tessellate>1</tessellate>
						<altitudeMode>relativeToGround</altitudeMode>
						<coordinates>						-177.66670139673573,37.000200051700126,4619595.311085918						 						-179.0390752279102,37.00212560038311,4579173.852113916						</coordinates>
					</LineString>
				</Placemark>
				<Placemark>
					<TimeSpan>
						<begin>2015-09-10</begin>
						<end></end>
					</TimeSpan>
					<styleUrl>branch_style4</styleUrl>
					<LineString>
						<tessellate>1</tessellate>
						<altitudeMode>relativeToGround</altitudeMode>
						<coordinates>						-179.0390752279102,37.00212560038311,4579173.852113916						 						179.5886589298506,37.00425230409785,4534902.730382677						</coordinates>
					</LineString>
				</Placemark>
				<Placemark>
					<TimeSpan>
						<begin>2015-09-12</begin>
						<end></end>
					</TimeSpan>
					<styleUrl>branch_style4</styleUrl>
					<LineString>
						<tessellate>1</tessellate>
						<altitudeMode>relativeToGround</altitudeMode>
						<coordinates>						179.5886589298506,37.00425230409785,4534902.730382677						 						178.21650479025925,37.006585406802564,4486781.945892199						</coordinates>
					</LineString>
				</Placemark>
				<Placemark>
					<TimeSpan>
						<begin>2015-09-14</begin>
						<end></end>
					</TimeSpan>
					<styleUrl>branch_style4</styleUrl>
					<LineString>
						<tessellate>1</tessellate>
						<altitudeMode>relativeToGround</altitudeMode>
						<coordinates>						178.21650479025925,37.006585406802564,4486781.945892199						 						176.8444661706823,37.00913043680084,4434811.498642482						</coordinates>
					</LineString>
				</Placemark>
				<Placemark>
					<TimeSpan>
						<begin>2015-09-15</begin>
						<end></end>
					</TimeSpan>
					<styleUrl>branch_style4</styleUrl>
					<LineString>
						<tessellate>1</tessellate>
						<altitudeMode>relativeToGround</altitudeMode>
						<coordinates>						176.8444661706823,37.00913043680084,4434811.498642482						 						175.47254699818788,37.011893230458895,4378991.388633527						</coordinates>
					</LineString>
				</Placemark>
				<Placemark>
					<TimeSpan>
						<begin>2015-09-17</begin>
						<end></end>
					</TimeSpan>
					<styleUrl>branch_style4</styleUrl>
					<LineString>
						<tessellate>1</tessellate>
						<altitudeMode>relativeToGround</altitudeMode>
						<coordinates>						175.47254699818788,37.011893230458895,4378991.388633527						 						174.10075131612996,37.01487995863458,4319321.615865333						</coordinates>
					</LineString>
				</Placemark>
				<Placemark>
					<TimeSpan>
						<begin>2015-09-19</begin>
						<end></end>
					</TimeSpan>
					<styleUrl>branch_style4</styleUrl>
					<LineString>
						<tessellate>1</tessellate>
						<altitudeMode>relativeToGround</altitudeMode>
						<coordinates>						174.10075131612996,37.01487995863458,4319321.615865333						 						172.72908329133213,37.01809715621684,4255802.180337904						</coordinates>
					</LineString>
				</Placemark>
				<Placemark>
					<TimeSpan>
						<begin>2015-09-21</begin>
						<end></end>
					</TimeSpan>
					<styleUrl>branch_style4</styleUrl>
					<LineString>
						<tessellate>1</tessellate>
						<altitudeMode>relativeToGround</altitudeMode>
						<coordinates>						172.72908329133213,37.01809715621684,4255802.180337904						 						171.3575472219483,37.02155175524718,4188433.0820512343						</coordinates>
					</LineString>
				</Placemark>
				<Placemark>
					<TimeSpan>
						<begin>2015-09-22</begin>
						<end></end>
					</TimeSpan>
					<styleUrl>branch_style4</styleUrl>
					<LineString>
						<tessellate>1</tessellate>
						<altitudeMode>relativeToGround</altitudeMode>
						<coordinates>						171.3575472219483,37.02155175524718,4188433.0820512343						 						169.98614754608587,37.02525112218276,4117214.3210053258						</coordinates>
					</LineString>
				</Placemark>
				<Placemark>
					<TimeSpan>
						<begin>2015-09-24</begin>
						<end></end>
					</TimeSpan>
					<styleUrl>branch_style4</styleUrl>
					<LineString>
						<tessellate>1</tessellate>
						<altitudeMode>relativeToGround</altitudeMode>
						<coordinates>						169.98614754608587,37.02525112218276,4117214.3210053258						 						168.6148888512951,37.029203099969465,4042145.8972001784						</coordinates>
					</LineString>
				</Placemark>
				<Placemark>
					<TimeSpan>
						<begin>2015-09-26</begin>
						<end></end>
					</TimeSpan>
					<styleUrl>branch_style4</styleUrl>
					<LineString>
						<tessellate>1</tessellate>
						<altitudeMode>relativeToGround</altitudeMode>
						<coordinates>						168.6148888512951,37.029203099969465,4042145.8972001784						 						167.24377588504308,37.033416055726654,3963227.810635794						</coordinates>
					</LineString>
				</Placemark>
				<Placemark>
					<TimeSpan>
						<begin>2015-09-28</begin>
						<end></end>
					</TimeSpan>
					<styleUrl>branch_style4</styleUrl>
					<LineString>
						<tessellate>1</tessellate>
						<altitudeMode>relativeToGround</altitudeMode>
						<coordinates>						167.24377588504308,37.033416055726654,3963227.810635794						 						165.87281356631473,37.03789893501128,3880460.0613121726						</coordinates>
					</LineString>
				</Placemark>
				<Placemark>
					<TimeSpan>
						<begin>2015-09-29</begin>
						<end></end>
					</TimeSpan>
					<styleUrl>branch_style4</styleUrl>
					<LineString>
						<tessellate>1</tessellate>
						<altitudeMode>relativeToGround</altitudeMode>
						<coordinates>						165.87281356631473,37.03789893501128,3880460.0613121726						 						164.50200699850637,37.04266132383658,3793842.6492293123						</coordinates>
					</LineString>
				</Placemark>
				<Placemark>
					<TimeSpan>
						<begin>2015-10-01</begin>
						<end></end>
					</TimeSpan>
					<styleUrl>branch_style4</styleUrl>
					<LineString>
						<tessellate>1</tessellate>
						<altitudeMode>relativeToGround</altitudeMode>
						<coordinates>						164.50200699850637,37.04266132383658,3793842.6492293123						 						163.13136148381452,37.047713519881626,3703375.5743872114						</coordinates>
					</LineString>
				</Placemark>
				<Placemark>
					<TimeSpan>
						<begin>2015-10-03</begin>
						<end></end>
					</TimeSpan>
					<styleUrl>branch_style4</styleUrl>
					<LineString>
						<tessellate>1</tessellate>
						<altitudeMode>relativeToGround</altitudeMode>
						<coordinates>						163.13136148381452,37.047713519881626,3703375.5743872114						 						161.76088253935683,37.05306661465932,3609058.8367858734						</coordinates>
					</LineString>
				</Placemark>
				<Placemark>
					<TimeSpan>
						<begin>2015-10-05</begin>
						<end></end>
					</TimeSpan>
					<styleUrl>branch_style4</styleUrl>
					<LineString>
						<tessellate>1</tessellate>
						<altitudeMode>relativeToGround</altitudeMode>
						<coordinates>						161.76088253935683,37.05306661465932,3609058.8367858734						 						160.39057591531642,37.058732588835284,3510892.4364252985						</coordinates>
					</LineString>
				</Placemark>
				<Placemark>
					<TimeSpan>
						<begin>2015-10-06</begin>
						<end></end>
					</TimeSpan>
					<styleUrl>branch_style4</styleUrl>
					<LineString>
						<tessellate>1</tessellate>
						<altitudeMode>relativeToGround</altitudeMode>
						<coordinates>						160.39057591531642,37.058732588835284,3510892.4364252985						 						159.02044761546242,37.06472442343727,3408876.373305483						</coordinates>
					</LineString>
				</Placemark>
				<Placemark>
					<TimeSpan>
						<begin>2015-10-08</begin>
						<end></end>
					</TimeSpan>
					<styleUrl>branch_style4</styleUrl>
					<LineString>
						<tessellate>1</tessellate>
						<altitudeMode>relativeToGround</altitudeMode>
						<coordinates>						159.02044761546242,37.06472442343727,3408876.373305483						 						157.65050392048082,37.07105623041073,3303010.647426434						</coordinates>
					</LineString>
				</Placemark>
				<Placemark>
					<TimeSpan>
						<begin>2015-10-10</begin>
						<end></end>
					</TimeSpan>
					<styleUrl>branch_style4</styleUrl>
					<LineString>
						<tessellate>1</tessellate>
						<altitudeMode>relativeToGround</altitudeMode>
						<coordinates>						157.65050392048082,37.07105623041073,3303010.647426434						 						156.28075141465047,37.07774340691738,3193295.2587881424						</coordinates>
					</LineString>
				</Placemark>
				<Placemark>
					<TimeSpan>
						<begin>2015-10-12</begin>
						<end></end>
					</TimeSpan>
					<styleUrl>branch_style4</styleUrl>
					<LineString>
						<tessellate>1</tessellate>
						<altitudeMode>relativeToGround</altitudeMode>
						<coordinates>						156.28075141465047,37.07774340691738,3193295.2587881424						 						154.91119701653827,37.084802819031104,3079730.207390612						</coordinates>
					</LineString>
				</Placemark>
				<Placemark>
					<TimeSpan>
						<begin>2015-10-13</begin>
						<end></end>
					</TimeSpan>
					<styleUrl>branch_style4</styleUrl>
					<LineString>
						<tessellate>1</tessellate>
						<altitudeMode>relativeToGround</altitudeMode>
						<coordinates>						154.91119701653827,37.084802819031104,3079730.207390612						 						153.5418480145596,37.09225302218114,2962315.4932338446						</coordinates>
					</LineString>
				</Placemark>
				<Placemark>
					<TimeSpan>
						<begin>2015-10-15</begin>
						<end></end>
					</TimeSpan>
					<styleUrl>branch_style4</styleUrl>
					<LineString>
						<tessellate>1</tessellate>
						<altitudeMode>relativeToGround</altitudeMode>
						<coordinates>						153.5418480145596,37.09225302218114,2962315.4932338446						 						152.17271210848816,37.100114528014224,2841051.1163178403						</coordinates>
					</LineString>
				</Placemark>
				<Placemark>
					<TimeSpan>
						<begin>2015-10-17</begin>
						<end></end>
					</TimeSpan>
					<styleUrl>branch_style4</styleUrl>
					<LineString>
						<tessellate>1</tessellate>
						<altitudeMode>relativeToGround</altitudeMode>
						<coordinates>						152.17271210848816,37.100114528014224,2841051.1163178403						 						150.80379745831854,37.10841013057112,2715937.076642597						</coordinates>
					</LineString>
				</Placemark>
				<Placemark>
					<TimeSpan>
						<begin>2015-10-19</begin>
						<end></end>
					</TimeSpan>
					<styleUrl>branch_style4</styleUrl>
					<LineString>
						<tessellate>1</tessellate>
						<altitudeMode>relativeToGround</altitudeMode>
						<coordinates>						150.80379745831854,37.10841013057112,2715937.076642597						 						149.4351127423208,37.117165309224816,2586973.374208115						</coordinates>
					</LineString>
				</Placemark>
				<Placemark>
					<TimeSpan>
						<begin>2015-10-20</begin>
						<end></end>
					</TimeSpan>
					<styleUrl>branch_style4</styleUrl>
					<LineString>
						<tessellate>1</tessellate>
						<altitudeMode>relativeToGround</altitudeMode>
						<coordinates>						149.4351127423208,37.117165309224816,2586973.374208115						 						148.0666672267372,37.12640873237061,2454160.009014396						</coordinates>
					</LineString>
				</Placemark>
				<Placemark>
					<TimeSpan>
						<begin>2015-10-22</begin>
						<end></end>
					</TimeSpan>
					<styleUrl>branch_style4</styleUrl>
					<LineString>
						<tessellate>1</tessellate>
						<altitudeMode>relativeToGround</altitudeMode>
						<coordinates>						148.0666672267372,37.12640873237061,2454160.009014396						 						146.69847085044728,37.13617289545493,2317496.9810614362						</coordinates>
					</LineString>
				</Placemark>
				<Placemark>
					<TimeSpan>
						<begin>2015-10-24</begin>
						<end></end>
					</TimeSpan>
					<styleUrl>branch_style4</styleUrl>
					<LineString>
						<tessellate>1</tessellate>
						<altitudeMode>relativeToGround</altitudeMode>
						<coordinates>						146.69847085044728,37.13617289545493,2317496.9810614362						 						145.33053432918985,37.14649494132495,2176984.2903492395						</coordinates>
					</LineString>
				</Placemark>
				<Placemark>
					<TimeSpan>
						<begin>2015-10-26</begin>
						<end></end>
					</TimeSpan>
					<styleUrl>branch_style4</styleUrl>
					<LineString>
						<tessellate>1</tessellate>
						<altitudeMode>relativeToGround</altitudeMode>
						<coordinates>						145.33053432918985,37.14649494132495,2176984.2903492395						 						143.96286928583072,37.15741773302684,2032621.9368778039						</coordinates>
					</LineString>
				</Placemark>
				<Placemark>
					<TimeSpan>
						<begin>2015-10-27</begin>
						<end></end>
					</TimeSpan>
					<styleUrl>branch_style4</styleUrl>
					<LineString>
						<tessellate>1</tessellate>
						<altitudeMode>relativeToGround</altitudeMode>
						<coordinates>						143.96286928583072,37.15741773302684,2032621.9368778039						 						142.5954884160742,37.16899128424646,1884409.9206471313						</coordinates>
					</LineString>
				</Placemark>
				<Placemark>
					<TimeSpan>
						<begin>2015-10-29</begin>
						<end></end>
					</TimeSpan>
					<styleUrl>branch_style4</styleUrl>
					<LineString>
						<tessellate>1</tessellate>
						<altitudeMode>relativeToGround</altitudeMode>
						<coordinates>						142.5954884160742,37.16899128424646,1884409.9206471313						 						141.22840570362794,37.181274709965955,1732348.241657218						</coordinates>
					</LineString>
				</Placemark>
				<Placemark>
					<TimeSpan>
						<begin>2015-10-31</begin>
						<end></end>
					</TimeSpan>
					<styleUrl>branch_style4</styleUrl>
					<LineString>
						<tessellate>1</tessellate>
						<altitudeMode>relativeToGround</altitudeMode>
						<coordinates>						141.22840570362794,37.181274709965955,1732348.241657218						 						139.861636706436,37.19433895745539,1576436.8999080732						</coordinates>
					</LineString>
				</Placemark>
				<Placemark>
					<TimeSpan>
						<begin>2015-11-01</begin>
						<end></end>
					</TimeSpan>
					<styleUrl>branch_style4</styleUrl>
					<LineString>
						<tessellate>1</tessellate>
						<altitudeMode>relativeToGround</altitudeMode>
						<coordinates>						139.861636706436,37.19433895745539,1576436.8999080732						 						138.49519894866972,37.20827075113539,1416675.895399684						</coordinates>
					</LineString>
				</Placemark>
				<Placemark>
					<TimeSpan>
						<begin>2015-11-03</begin>
						<end></end>
					</TimeSpan>
					<styleUrl>branch_style4</styleUrl>
					<LineString>
						<tessellate>1</tessellate>
						<altitudeMode>relativeToGround</altitudeMode>
						<coordinates>						138.49519894866972,37.20827075113539,1416675.895399684						 						137.12911247689706,37.22317851000063,1253065.228132058						</coordinates>
					</LineString>
				</Placemark>
				<Placemark>
					<TimeSpan>
						<begin>2015-11-05</begin>
						<end></end>
					</TimeSpan>
					<styleUrl>branch_style4</styleUrl>
					<LineString>
						<tessellate>1</tessellate>
						<altitudeMode>relativeToGround</altitudeMode>
						<coordinates>						137.12911247689706,37.22317851000063,1253065.228132058						 						135.7634006847485,37.23920164660387,1085604.898105193						</coordinates>
					</LineString>
				</Placemark>
				<Placemark>
					<TimeSpan>
						<begin>2015-11-07</begin>
						<end></end>
					</TimeSpan>
					<styleUrl>branch_style4</styleUrl>
					<LineString>
						<tessellate>1</tessellate>
						<altitudeMode>relativeToGround</altitudeMode>
						<coordinates>						135.7634006847485,37.23920164660387,1085604.898105193						 						134.3980916065218,37.25652606559586,914294.9053190909						</coordinates>
					</LineString>
				</Placemark>
				<Placemark>
					<TimeSpan>
						<begin>2015-11-08</begin>
						<end></end>
					</TimeSpan>
					<styleUrl>branch_style4</styleUrl>
					<LineString>
						<tessellate>1</tessellate>
						<altitudeMode>relativeToGround</altitudeMode>
						<coordinates>						134.3980916065218,37.25652606559586,914294.9053190909						 						133.03322010314955,37.275412061385076,739135.2497737482						</coordinates>
					</LineString>
				</Placemark>
				<Placemark>
					<TimeSpan>
						<begin>2015-11-10</begin>
						<end></end>
					</TimeSpan>
					<styleUrl>branch_style4</styleUrl>
					<LineString>
						<tessellate>1</tessellate>
						<altitudeMode>relativeToGround</altitudeMode>
						<coordinates>						133.03322010314955,37.275412061385076,739135.2497737482						 						131.66883195650797,37.296250113691436,560125.9314691685						</coordinates>
					</LineString>
				</Placemark>
				<Placemark>
					<TimeSpan>
						<begin>2015-11-12</begin>
						<end></end>
					</TimeSpan>
					<styleUrl>branch_style4</styleUrl>
					<LineString>
						<tessellate>1</tessellate>
						<altitudeMode>relativeToGround</altitudeMode>
						<coordinates>						131.66883195650797,37.296250113691436,560125.9314691685						 						130.30499279714078,37.31969107666547,377266.9504053518						</coordinates>
					</LineString>
				</Placemark>
				<Placemark>
					<TimeSpan>
						<begin>2015-11-14</begin>
						<end></end>
					</TimeSpan>
					<styleUrl>branch_style4</styleUrl>
					<LineString>
						<tessellate>1</tessellate>
						<altitudeMode>relativeToGround</altitudeMode>
						<coordinates>						130.30499279714078,37.31969107666547,377266.9504053518						 						128.94181309845496,37.347036740379686,190558.3065822944						</coordinates>
					</LineString>
				</Placemark>
				<Placemark>
					<TimeSpan>
						<begin>2015-11-16</begin>
						<end></end>
					</TimeSpan>
					<styleUrl>branch_style4</styleUrl>
					<LineString>
						<tessellate>1</tessellate>
						<altitudeMode>relativeToGround</altitudeMode>
						<coordinates>						128.94181309845496,37.347036740379686,190558.3065822944						 						127.58000183105469,37.38999938964844,0.0						</coordinates>
					</LineString>
				</Placemark>
			</Folder>
			<Folder>
				<name>US:Canada</name>
				<Placemark>
					<TimeSpan>
						<begin>2015-07-16</begin>
						<end></end>
					</TimeSpan>
					<styleUrl>branch_style5</styleUrl>
					<LineString>
						<tessellate>1</tessellate>
						<altitudeMode>relativeToGround</altitudeMode>
						<coordinates>						-95.2300033569336,37.13999938964844,0.0						 						-95.34862639900484,37.3355633422319,36482.407602261424						</coordinates>
					</LineString>
				</Placemark>
				<Placemark>
					<TimeSpan>
						<begin>2015-07-17</begin>
						<end></end>
					</TimeSpan>
					<styleUrl>branch_style5</styleUrl>
					<LineString>
						<tessellate>1</tessellate>
						<altitudeMode>relativeToGround</altitudeMode>
						<coordinates>						-95.34862639900484,37.3355633422319,36482.407602261424						 						-95.46720262036632,37.53112757599783,72227.79686912363						</coordinates>
					</LineString>
				</Placemark>
				<Placemark>
					<TimeSpan>
						<begin>2015-07-18</begin>
						<end></end>
					</TimeSpan>
					<styleUrl>branch_style5</styleUrl>
					<LineString>
						<tessellate>1</tessellate>
						<altitudeMode>relativeToGround</altitudeMode>
						<coordinates>						-95.46720262036632,37.53112757599783,72227.79686912363						 						-95.58572853794865,37.72669209726279,107236.1678005866						</coordinates>
					</LineString>
				</Placemark>
				<Placemark>
					<TimeSpan>
						<begin>2015-07-19</begin>
						<end></end>
					</TimeSpan>
					<styleUrl>branch_style5</styleUrl>
					<LineString>
						<tessellate>1</tessellate>
						<altitudeMode>relativeToGround</altitudeMode>
						<coordinates>						-95.58572853794865,37.72669209726279,107236.1678005866						 						-95.70420064341009,37.922256912427756,141507.52039665036						</coordinates>
					</LineString>
				</Placemark>
				<Placemark>
					<TimeSpan>
						<begin>2015-07-21</begin>
						<end></end>
					</TimeSpan>
					<styleUrl>branch_style5</styleUrl>
					<LineString>
						<tessellate>1</tessellate>
						<altitudeMode>relativeToGround</altitudeMode>
						<coordinates>						-95.70420064341009,37.922256912427756,141507.52039665036						 						-95.82261540312582,38.11782202798037,175041.85465731492						</coordinates>
					</LineString>
				</Placemark>
				<Placemark>
					<TimeSpan>
						<begin>2015-07-22</begin>
						<end></end>
					</TimeSpan>
					<styleUrl>branch_style5</styleUrl>
					<LineString>
						<tessellate>1</tessellate>
						<altitudeMode>relativeToGround</altitudeMode>
						<coordinates>						-95.82261540312582,38.11782202798037,175041.85465731492						 						-95.94096925818066,38.313387450497174,207839.1705825802						</coordinates>
					</LineString>
				</Placemark>
				<Placemark>
					<TimeSpan>
						<begin>2015-07-23</begin>
						<end></end>
					</TimeSpan>
					<styleUrl>branch_style5</styleUrl>
					<LineString>
						<tessellate>1</tessellate>
						<altitudeMode>relativeToGround</altitudeMode>
						<coordinates>						-95.94096925818066,38.313387450497174,207839.1705825802						 						-96.05925862436577,38.508953186646075,239899.46817244633						</coordinates>
					</LineString>
				</Placemark>
				<Placemark>
					<TimeSpan>
						<begin>2015-07-24</begin>
						<end></end>
					</TimeSpan>
					<styleUrl>branch_style5</styleUrl>
					<LineString>
						<tessellate>1</tessellate>
						<altitudeMode>relativeToGround</altitudeMode>
						<coordinates>						-96.05925862436577,38.508953186646075,239899.46817244633						 						-96.17747989217897,38.70451924318879,271222.74742691324						</coordinates>
					</LineString>
				</Placemark>
				<Placemark>
					<TimeSpan>
						<begin>2015-07-26</begin>
						<end></end>
					</TimeSpan>
					<styleUrl>branch_style5</styleUrl>
					<LineString>
						<tessellate>1</tessellate>
						<altitudeMode>relativeToGround</altitudeMode>
						<coordinates>						-96.17747989217897,38.70451924318879,271222.74742691324						 						-96.29562942682891,38.90008562698348,301809.00834598084						</coordinates>
					</LineString>
				</Placemark>
				<Placemark>
					<TimeSpan>
						<begin>2015-07-27</begin>
						<end></end>
					</TimeSpan>
					<styleUrl>branch_style5</styleUrl>
					<LineString>
						<tessellate>1</tessellate>
						<altitudeMode>relativeToGround</altitudeMode>
						<coordinates>						-96.29562942682891,38.90008562698348,301809.00834598084						 						-96.4137035682433,39.095652344987485,331658.25092964934						</coordinates>
					</LineString>
				</Placemark>
				<Placemark>
					<TimeSpan>
						<begin>2015-07-28</begin>
						<end></end>
					</TimeSpan>
					<styleUrl>branch_style5</styleUrl>
					<LineString>
						<tessellate>1</tessellate>
						<altitudeMode>relativeToGround</altitudeMode>
						<coordinates>						-96.4137035682433,39.095652344987485,331658.25092964934						 						-96.53169863108118,39.29121940426019,360770.4751779185						</coordinates>
					</LineString>
				</Placemark>
				<Placemark>
					<TimeSpan>
						<begin>2015-07-29</begin>
						<end></end>
					</TimeSpan>
					<styleUrl>branch_style5</styleUrl>
					<LineString>
						<tessellate>1</tessellate>
						<altitudeMode>relativeToGround</altitudeMode>
						<coordinates>						-96.53169863108118,39.29121940426019,360770.4751779185						 						-96.64961090474895,39.48678681196597,389145.6810907885						</coordinates>
					</LineString>
				</Placemark>
				<Placemark>
					<TimeSpan>
						<begin>2015-07-31</begin>
						<end></end>
					</TimeSpan>
					<styleUrl>branch_style5</styleUrl>
					<LineString>
						<tessellate>1</tessellate>
						<altitudeMode>relativeToGround</altitudeMode>
						<coordinates>						-96.64961090474895,39.48678681196597,389145.6810907885						 						-96.76743665342107,39.68235457537739,416783.8686682593						</coordinates>
					</LineString>
				</Placemark>
				<Placemark>
					<TimeSpan>
						<begin>2015-08-01</begin>
						<end></end>
					</TimeSpan>
					<styleUrl>branch_style5</styleUrl>
					<LineString>
						<tessellate>1</tessellate>
						<altitudeMode>relativeToGround</altitudeMode>
						<coordinates>						-96.76743665342107,39.68235457537739,416783.8686682593						 						-96.88517211606457,39.877922701878425,443685.0379103308						</coordinates>
					</LineString>
				</Placemark>
				<Placemark>
					<TimeSpan>
						<begin>2015-08-02</begin>
						<end></end>
					</TimeSpan>
					<styleUrl>branch_style5</styleUrl>
					<LineString>
						<tessellate>1</tessellate>
						<altitudeMode>relativeToGround</altitudeMode>
						<coordinates>						-96.88517211606457,39.877922701878425,443685.0379103308						 						-97.00281350646794,40.07349119896789,469849.1888170032						</coordinates>
					</LineString>
				</Placemark>
				<Placemark>
					<TimeSpan>
						<begin>2015-08-03</begin>
						<end></end>
					</TimeSpan>
					<styleUrl>branch_style5</styleUrl>
					<LineString>
						<tessellate>1</tessellate>
						<altitudeMode>relativeToGround</altitudeMode>
						<coordinates>						-97.00281350646794,40.07349119896789,469849.1888170032						 						-97.12035701327459,40.26906007426312,495276.3213882763						</coordinates>
					</LineString>
				</Placemark>
				<Placemark>
					<TimeSpan>
						<begin>2015-08-05</begin>
						<end></end>
					</TimeSpan>
					<styleUrl>branch_style5</styleUrl>
					<LineString>
						<tessellate>1</tessellate>
						<altitudeMode>relativeToGround</altitudeMode>
						<coordinates>						-97.12035701327459,40.26906007426312,495276.3213882763						 						-97.23779880002054,40.464629335503645,519966.43562415015						</coordinates>
					</LineString>
				</Placemark>
				<Placemark>
					<TimeSpan>
						<begin>2015-08-06</begin>
						<end></end>
					</TimeSpan>
					<styleUrl>branch_style5</styleUrl>
					<LineString>
						<tessellate>1</tessellate>
						<altitudeMode>relativeToGround</altitudeMode>
						<coordinates>						-97.23779880002054,40.464629335503645,519966.43562415015						 						-97.35513500517665,40.66019899055524,543919.5315246248						</coordinates>
					</LineString>
				</Placemark>
				<Placemark>
					<TimeSpan>
						<begin>2015-08-07</begin>
						<end></end>
					</TimeSpan>
					<styleUrl>branch_style5</styleUrl>
					<LineString>
						<tessellate>1</tessellate>
						<altitudeMode>relativeToGround</altitudeMode>
						<coordinates>						-97.35513500517665,40.66019899055524,543919.5315246248						 						-97.47236174219536,40.85576904741399,567135.6090897004						</coordinates>
					</LineString>
				</Placemark>
				<Placemark>
					<TimeSpan>
						<begin>2015-08-08</begin>
						<end></end>
					</TimeSpan>
					<styleUrl>branch_style5</styleUrl>
					<LineString>
						<tessellate>1</tessellate>
						<altitudeMode>relativeToGround</altitudeMode>
						<coordinates>						-97.47236174219536,40.85576904741399,567135.6090897004						 						-97.58947509956207,41.05133951421082,589614.6683193765						</coordinates>
					</LineString>
				</Placemark>
				<Placemark>
					<TimeSpan>
						<begin>2015-08-10</begin>
						<end></end>
					</TimeSpan>
					<styleUrl>branch_style5</styleUrl>
					<LineString>
						<tessellate>1</tessellate>
						<altitudeMode>relativeToGround</altitudeMode>
						<coordinates>						-97.58947509956207,41.05133951421082,589614.6683193765						 						-97.70647114085128,41.24691039921586,611356.7092136536						</coordinates>
					</LineString>
				</Placemark>
				<Placemark>
					<TimeSpan>
						<begin>2015-08-11</begin>
						<end></end>
					</TimeSpan>
					<styleUrl>branch_style5</styleUrl>
					<LineString>
						<tessellate>1</tessellate>
						<altitudeMode>relativeToGround</altitudeMode>
						<coordinates>						-97.70647114085128,41.24691039921586,611356.7092136536						 						-97.82334590478719,41.442481710843545,632361.7317725313						</coordinates>
					</LineString>
				</Placemark>
				<Placemark>
					<TimeSpan>
						<begin>2015-08-12</begin>
						<end></end>
					</TimeSpan>
					<styleUrl>branch_style5</styleUrl>
					<LineString>
						<tessellate>1</tessellate>
						<altitudeMode>relativeToGround</altitudeMode>
						<coordinates>						-97.82334590478719,41.442481710843545,632361.7317725313						 						-97.9400954053092,41.638053457657534,652629.7359960099						</coordinates>
					</LineString>
				</Placemark>
				<Placemark>
					<TimeSpan>
						<begin>2015-08-13</begin>
						<end></end>
					</TimeSpan>
					<styleUrl>branch_style5</styleUrl>
					<LineString>
						<tessellate>1</tessellate>
						<altitudeMode>relativeToGround</altitudeMode>
						<coordinates>						-97.9400954053092,41.638053457657534,652629.7359960099						 						-98.05671563164215,41.83362564837613,672160.7218840892						</coordinates>
					</LineString>
				</Placemark>
				<Placemark>
					<TimeSpan>
						<begin>2015-08-15</begin>
						<end></end>
					</TimeSpan>
					<styleUrl>branch_style5</styleUrl>
					<LineString>
						<tessellate>1</tessellate>
						<altitudeMode>relativeToGround</altitudeMode>
						<coordinates>						-98.05671563164215,41.83362564837613,672160.7218840892						 						-98.17320254837128,42.02919829187789,690954.6894367695						</coordinates>
					</LineString>
				</Placemark>
				<Placemark>
					<TimeSpan>
						<begin>2015-08-16</begin>
						<end></end>
					</TimeSpan>
					<styleUrl>branch_style5</styleUrl>
					<LineString>
						<tessellate>1</tessellate>
						<altitudeMode>relativeToGround</altitudeMode>
						<coordinates>						-98.17320254837128,42.02919829187789,690954.6894367695						 						-98.28955209552223,42.22477139720766,709011.6386540503						</coordinates>
					</LineString>
				</Placemark>
				<Placemark>
					<TimeSpan>
						<begin>2015-08-17</begin>
						<end></end>
					</TimeSpan>
					<styleUrl>branch_style5</styleUrl>
					<LineString>
						<tessellate>1</tessellate>
						<altitudeMode>relativeToGround</altitudeMode>
						<coordinates>						-98.28955209552223,42.22477139720766,709011.6386540503						 						-98.40576018864553,42.420344973582814,726331.569535932						</coordinates>
					</LineString>
				</Placemark>
				<Placemark>
					<TimeSpan>
						<begin>2015-08-18</begin>
						<end></end>
					</TimeSpan>
					<styleUrl>branch_style5</styleUrl>
					<LineString>
						<tessellate>1</tessellate>
						<altitudeMode>relativeToGround</altitudeMode>
						<coordinates>						-98.40576018864553,42.420344973582814,726331.569535932						 						-98.5218227189063,42.615919030399894,742914.4820824144						</coordinates>
					</LineString>
				</Placemark>
				<Placemark>
					<TimeSpan>
						<begin>2015-08-19</begin>
						<end></end>
					</TimeSpan>
					<styleUrl>branch_style5</styleUrl>
					<LineString>
						<tessellate>1</tessellate>
						<altitudeMode>relativeToGround</altitudeMode>
						<coordinates>						-98.5218227189063,42.615919030399894,742914.4820824144						 						-98.63773555317836,42.81149357724166,758760.3762934976						</coordinates>
					</LineString>
				</Placemark>
				<Placemark>
					<TimeSpan>
						<begin>2015-08-21</begin>
						<end></end>
					</TimeSpan>
					<styleUrl>branch_style5</styleUrl>
					<LineString>
						<tessellate>1</tessellate>
						<altitudeMode>relativeToGround</altitudeMode>
						<coordinates>						-98.63773555317836,42.81149357724166,758760.3762934976						 						-98.75349453414356,43.00706862388447,773869.2521691818						</coordinates>
					</LineString>
				</Placemark>
				<Placemark>
					<TimeSpan>
						<begin>2015-08-22</begin>
						<end></end>
					</TimeSpan>
					<styleUrl>branch_style5</styleUrl>
					<LineString>
						<tessellate>1</tessellate>
						<altitudeMode>relativeToGround</altitudeMode>
						<coordinates>						-98.75349453414356,43.00706862388447,773869.2521691818						 						-98.86909548039567,43.20264418030618,788241.1097094663						</coordinates>
					</LineString>
				</Placemark>
				<Placemark>
					<TimeSpan>
						<begin>2015-08-23</begin>
						<end></end>
					</TimeSpan>
					<styleUrl>branch_style5</styleUrl>
					<LineString>
						<tessellate>1</tessellate>
						<altitudeMode>relativeToGround</altitudeMode>
						<coordinates>						-98.86909548039567,43.20264418030618,788241.1097094663						 						-98.9845341865489,43.398220256694444,801875.9489143521						</coordinates>
					</LineString>
				</Placemark>
				<Placemark>
					<TimeSpan>
						<begin>2015-08-24</begin>
						<end></end>
					</TimeSpan>
					<styleUrl>branch_style5</styleUrl>
					<LineString>
						<tessellate>1</tessellate>
						<altitudeMode>relativeToGround</altitudeMode>
						<coordinates>						-98.9845341865489,43.398220256694444,801875.9489143521						 						-99.09980642335131,43.59379686345553,814773.7697838385						</coordinates>
					</LineString>
				</Placemark>
				<Placemark>
					<TimeSpan>
						<begin>2015-08-26</begin>
						<end></end>
					</TimeSpan>
					<styleUrl>branch_style5</styleUrl>
					<LineString>
						<tessellate>1</tessellate>
						<altitudeMode>relativeToGround</altitudeMode>
						<coordinates>						-99.09980642335131,43.59379686345553,814773.7697838385						 						-99.21490793780265,43.78937401122367,826934.5723179255						</coordinates>
					</LineString>
				</Placemark>
				<Placemark>
					<TimeSpan>
						<begin>2015-08-27</begin>
						<end></end>
					</TimeSpan>
					<styleUrl>branch_style5</styleUrl>
					<LineString>
						<tessellate>1</tessellate>
						<altitudeMode>relativeToGround</altitudeMode>
						<coordinates>						-99.21490793780265,43.78937401122367,826934.5723179255						 						-99.32983445327677,43.98495171087101,838358.3565166136						</coordinates>
					</LineString>
				</Placemark>
				<Placemark>
					<TimeSpan>
						<begin>2015-08-28</begin>
						<end></end>
					</TimeSpan>
					<styleUrl>branch_style5</styleUrl>
					<LineString>
						<tessellate>1</tessellate>
						<altitudeMode>relativeToGround</altitudeMode>
						<coordinates>						-99.32983445327677,43.98495171087101,838358.3565166136						 						-99.44458166964817,44.18052997351815,849045.1223799022						</coordinates>
					</LineString>
				</Placemark>
				<Placemark>
					<TimeSpan>
						<begin>2015-08-29</begin>
						<end></end>
					</TimeSpan>
					<styleUrl>branch_style5</styleUrl>
					<LineString>
						<tessellate>1</tessellate>
						<altitudeMode>relativeToGround</altitudeMode>
						<coordinates>						-99.44458166964817,44.18052997351815,849045.1223799022						 						-99.55914526342316,44.37610881054537,858994.8699077917						</coordinates>
					</LineString>
				</Placemark>
				<Placemark>
					<TimeSpan>
						<begin>2015-08-31</begin>
						<end></end>
					</TimeSpan>
					<styleUrl>branch_style5</styleUrl>
					<LineString>
						<tessellate>1</tessellate>
						<altitudeMode>relativeToGround</altitudeMode>
						<coordinates>						-99.55914526342316,44.37610881054537,858994.8699077917						 						-99.67352088787456,44.57168823360457,868207.5991002821						</coordinates>
					</LineString>
				</Placemark>
				<Placemark>
					<TimeSpan>
						<begin>2015-09-01</begin>
						<end></end>
					</TimeSpan>
					<styleUrl>branch_style5</styleUrl>
					<LineString>
						<tessellate>1</tessellate>
						<altitudeMode>relativeToGround</altitudeMode>
						<coordinates>						-99.67352088787456,44.57168823360457,868207.5991002821						 						-99.78770417318057,44.767268254632,876683.309957373						</coordinates>
					</LineString>
				</Placemark>
				<Placemark>
					<TimeSpan>
						<begin>2015-09-02</begin>
						<end></end>
					</TimeSpan>
					<styleUrl>branch_style5</styleUrl>
					<LineString>
						<tessellate>1</tessellate>
						<altitudeMode>relativeToGround</altitudeMode>
						<coordinates>						-99.78770417318057,44.767268254632,876683.309957373						 						-99.90169072656705,44.96284888586187,884422.0024790649						</coordinates>
					</LineString>
				</Placemark>
				<Placemark>
					<TimeSpan>
						<begin>2015-09-03</begin>
						<end></end>
					</TimeSpan>
					<styleUrl>branch_style5</styleUrl>
					<LineString>
						<tessellate>1</tessellate>
						<altitudeMode>relativeToGround</altitudeMode>
						<coordinates>						-99.90169072656705,44.96284888586187,884422.0024790649						 						-100.01547613245317,45.158430139840775,891423.6766653573						</coordinates>
					</LineString>
				</Placemark>
				<Placemark>
					<TimeSpan>
						<begin>2015-09-05</begin>
						<end></end>
					</TimeSpan>
					<styleUrl>branch_style5</styleUrl>
					<LineString>
						<tessellate>1</tessellate>
						<altitudeMode>relativeToGround</altitudeMode>
						<coordinates>						-100.01547613245317,45.158430139840775,891423.6766653573						 						-100.12905595259977,45.35401202944322,897688.3325162508						</coordinates>
					</LineString>
				</Placemark>
				<Placemark>
					<TimeSpan>
						<begin>2015-09-06</begin>
						<end></end>
					</TimeSpan>
					<styleUrl>branch_style5</styleUrl>
					<LineString>
						<tessellate>1</tessellate>
						<altitudeMode>relativeToGround</altitudeMode>
						<coordinates>						-100.12905595259977,45.35401202944322,897688.3325162508						 						-100.24242572626065,45.54959456788824,903215.970031745						</coordinates>
					</LineString>
				</Placemark>
				<Placemark>
					<TimeSpan>
						<begin>2015-09-07</begin>
						<end></end>
					</TimeSpan>
					<styleUrl>branch_style5</styleUrl>
					<LineString>
						<tessellate>1</tessellate>
						<altitudeMode>relativeToGround</altitudeMode>
						<coordinates>						-100.24242572626065,45.54959456788824,903215.970031745						 						-100.35558097033554,45.74517776875703,908006.5892118398						</coordinates>
					</LineString>
				</Placemark>
				<Placemark>
					<TimeSpan>
						<begin>2015-09-08</begin>
						<end></end>
					</TimeSpan>
					<styleUrl>branch_style5</styleUrl>
					<LineString>
						<tessellate>1</tessellate>
						<altitudeMode>relativeToGround</altitudeMode>
						<coordinates>						-100.35558097033554,45.74517776875703,908006.5892118398						 						-100.46851717952504,45.94076164601203,912060.1900565356						</coordinates>
					</LineString>
				</Placemark>
				<Placemark>
					<TimeSpan>
						<begin>2015-09-10</begin>
						<end></end>
					</TimeSpan>
					<styleUrl>branch_style5</styleUrl>
					<LineString>
						<tessellate>1</tessellate>
						<altitudeMode>relativeToGround</altitudeMode>
						<coordinates>						-100.46851717952504,45.94076164601203,912060.1900565356						 						-100.58122982648644,46.13634621401741,915376.772565832						</coordinates>
					</LineString>
				</Placemark>
				<Placemark>
					<TimeSpan>
						<begin>2015-09-11</begin>
						<end></end>
					</TimeSpan>
					<styleUrl>branch_style5</styleUrl>
					<LineString>
						<tessellate>1</tessellate>
						<altitudeMode>relativeToGround</altitudeMode>
						<coordinates>						-100.58122982648644,46.13634621401741,915376.772565832						 						-100.69371436198973,46.331931487560915,917956.3367397294						</coordinates>
					</LineString>
				</Placemark>
				<Placemark>
					<TimeSpan>
						<begin>2015-09-12</begin>
						<end></end>
					</TimeSpan>
					<styleUrl>branch_style5</styleUrl>
					<LineString>
						<tessellate>1</tessellate>
						<altitudeMode>relativeToGround</altitudeMode>
						<coordinates>						-100.69371436198973,46.331931487560915,917956.3367397294						 						-100.80596621507361,46.52751748187755,919798.8825782273						</coordinates>
					</LineString>
				</Placemark>
				<Placemark>
					<TimeSpan>
						<begin>2015-09-13</begin>
						<end></end>
					</TimeSpan>
					<styleUrl>branch_style5</styleUrl>
					<LineString>
						<tessellate>1</tessellate>
						<altitudeMode>relativeToGround</altitudeMode>
						<coordinates>						-100.80596621507361,46.52751748187755,919798.8825782273						 						-100.91798079319969,46.723104212675004,920904.4100813263						</coordinates>
					</LineString>
				</Placemark>
				<Placemark>
					<TimeSpan>
						<begin>2015-09-15</begin>
						<end></end>
					</TimeSpan>
					<styleUrl>branch_style5</styleUrl>
					<LineString>
						<tessellate>1</tessellate>
						<altitudeMode>relativeToGround</altitudeMode>
						<coordinates>						-100.91798079319969,46.723104212675004,920904.4100813263						 						-101.0297534824048,46.918691696161154,921272.919249026						</coordinates>
					</LineString>
				</Placemark>
				<Placemark>
					<TimeSpan>
						<begin>2015-09-16</begin>
						<end></end>
					</TimeSpan>
					<styleUrl>branch_style5</styleUrl>
					<LineString>
						<tessellate>1</tessellate>
						<altitudeMode>relativeToGround</altitudeMode>
						<coordinates>						-101.0297534824048,46.918691696161154,921272.919249026						 						-101.14127964744985,47.11427994907372,920904.4100813263						</coordinates>
					</LineString>
				</Placemark>
				<Placemark>
					<TimeSpan>
						<begin>2015-09-17</begin>
						<end></end>
					</TimeSpan>
					<styleUrl>branch_style5</styleUrl>
					<LineString>
						<tessellate>1</tessellate>
						<altitudeMode>relativeToGround</altitudeMode>
						<coordinates>						-101.14127964744985,47.11427994907372,920904.4100813263						 						-101.25255463196379,47.309868988712395,919798.8825782274						</coordinates>
					</LineString>
				</Placemark>
				<Placemark>
					<TimeSpan>
						<begin>2015-09-18</begin>
						<end></end>
					</TimeSpan>
					<styleUrl>branch_style5</styleUrl>
					<LineString>
						<tessellate>1</tessellate>
						<altitudeMode>relativeToGround</altitudeMode>
						<coordinates>						-101.25255463196379,47.309868988712395,919798.8825782274						 						-101.36357375858144,47.50545883297367,917956.3367397293						</coordinates>
					</LineString>
				</Placemark>
				<Placemark>
					<TimeSpan>
						<begin>2015-09-19</begin>
						<end></end>
					</TimeSpan>
					<styleUrl>branch_style5</styleUrl>
					<LineString>
						<tessellate>1</tessellate>
						<altitudeMode>relativeToGround</altitudeMode>
						<coordinates>						-101.36357375858144,47.50545883297367,917956.3367397293						 						-101.4743323290736,47.70104950038864,915376.7725658321						</coordinates>
					</LineString>
				</Placemark>
				<Placemark>
					<TimeSpan>
						<begin>2015-09-21</begin>
						<end></end>
					</TimeSpan>
					<styleUrl>branch_style5</styleUrl>
					<LineString>
						<tessellate>1</tessellate>
						<altitudeMode>relativeToGround</altitudeMode>
						<coordinates>						-101.4743323290736,47.70104950038864,915376.7725658321						 						-101.58482562446711,47.89664101016407,912060.1900565356						</coordinates>
					</LineString>
				</Placemark>
				<Placemark>
					<TimeSpan>
						<begin>2015-09-22</begin>
						<end></end>
					</TimeSpan>
					<styleUrl>branch_style5</styleUrl>
					<LineString>
						<tessellate>1</tessellate>
						<altitudeMode>relativeToGround</altitudeMode>
						<coordinates>						-101.58482562446711,47.89664101016407,912060.1900565356						 						-101.69504890515283,48.092233382227185,908006.58921184						</coordinates>
					</LineString>
				</Placemark>
				<Placemark>
					<TimeSpan>
						<begin>2015-09-23</begin>
						<end></end>
					</TimeSpan>
					<styleUrl>branch_style5</styleUrl>
					<LineString>
						<tessellate>1</tessellate>
						<altitudeMode>relativeToGround</altitudeMode>
						<coordinates>						-101.69504890515283,48.092233382227185,908006.58921184						 						-101.80499741097908,48.2878266372746,903215.970031745						</coordinates>
					</LineString>
				</Placemark>
				<Placemark>
					<TimeSpan>
						<begin>2015-09-24</begin>
						<end></end>
					</TimeSpan>
					<styleUrl>branch_style5</styleUrl>
					<LineString>
						<tessellate>1</tessellate>
						<altitudeMode>relativeToGround</altitudeMode>
						<coordinates>						-101.80499741097908,48.2878266372746,903215.970031745						 						-101.9146663613275,48.483420796825634,897688.3325162507						</coordinates>
					</LineString>
				</Placemark>
				<Placemark>
					<TimeSpan>
						<begin>2015-09-26</begin>
						<end></end>
					</TimeSpan>
					<styleUrl>branch_style5</styleUrl>
					<LineString>
						<tessellate>1</tessellate>
						<altitudeMode>relativeToGround</altitudeMode>
						<coordinates>						-101.9146663613275,48.483420796825634,897688.3325162507						 						-102.02405095516784,48.67901588328096,891423.6766653578						</coordinates>
					</LineString>
				</Placemark>
				<Placemark>
					<TimeSpan>
						<begin>2015-09-27</begin>
						<end></end>
					</TimeSpan>
					<styleUrl>branch_style5</styleUrl>
					<LineString>
						<tessellate>1</tessellate>
						<altitudeMode>relativeToGround</altitudeMode>
						<coordinates>						-102.02405095516784,48.67901588328096,891423.6766653578						 						-102.13314637108786,48.87461191998681,884422.002479065						</coordinates>
					</LineString>
				</Placemark>
				<Placemark>
					<TimeSpan>
						<begin>2015-09-28</begin>
						<end></end>
					</TimeSpan>
					<styleUrl>branch_style5</styleUrl>
					<LineString>
						<tessellate>1</tessellate>
						<altitudeMode>relativeToGround</altitudeMode>
						<coordinates>						-102.13314637108786,48.87461191998681,884422.002479065						 						-102.24194776729365,49.070208931305736,876683.309957373						</coordinates>
					</LineString>
				</Placemark>
				<Placemark>
					<TimeSpan>
						<begin>2015-09-29</begin>
						<end></end>
					</TimeSpan>
					<styleUrl>branch_style5</styleUrl>
					<LineString>
						<tessellate>1</tessellate>
						<altitudeMode>relativeToGround</altitudeMode>
						<coordinates>						-102.24194776729365,49.070208931305736,876683.309957373						 						-102.35045028157532,49.26580694269453,868207.5991002817						</coordinates>
					</LineString>
				</Placemark>
				<Placemark>
					<TimeSpan>
						<begin>2015-10-01</begin>
						<end></end>
					</TimeSpan>
					<styleUrl>branch_style5</styleUrl>
					<LineString>
						<tessellate>1</tessellate>
						<altitudeMode>relativeToGround</altitudeMode>
						<coordinates>						-102.35045028157532,49.26580694269453,868207.5991002817						 						-102.45864903123174,49.46140598079058,858994.869907792						</coordinates>
					</LineString>
				</Placemark>
				<Placemark>
					<TimeSpan>
						<begin>2015-10-02</begin>
						<end></end>
					</TimeSpan>
					<styleUrl>branch_style5</styleUrl>
					<LineString>
						<tessellate>1</tessellate>
						<altitudeMode>relativeToGround</altitudeMode>
						<coordinates>						-102.45864903123174,49.46140598079058,858994.869907792						 						-102.566539112947,49.6570060735073,849045.1223799023						</coordinates>
					</LineString>
				</Placemark>
				<Placemark>
					<TimeSpan>
						<begin>2015-10-03</begin>
						<end></end>
					</TimeSpan>
					<styleUrl>branch_style5</styleUrl>
					<LineString>
						<tessellate>1</tessellate>
						<altitudeMode>relativeToGround</altitudeMode>
						<coordinates>						-102.566539112947,49.6570060735073,849045.1223799023						 						-102.67411560261058,49.8526072501404,838358.3565166134						</coordinates>
					</LineString>
				</Placemark>
				<Placemark>
					<TimeSpan>
						<begin>2015-10-04</begin>
						<end></end>
					</TimeSpan>
					<styleUrl>branch_style5</styleUrl>
					<LineString>
						<tessellate>1</tessellate>
						<altitudeMode>relativeToGround</altitudeMode>
						<coordinates>						-102.67411560261058,49.8526072501404,838358.3565166134						 						-102.78137355507063,50.04820954148628,826934.5723179257						</coordinates>
					</LineString>
				</Placemark>
				<Placemark>
					<TimeSpan>
						<begin>2015-10-06</begin>
						<end></end>
					</TimeSpan>
					<styleUrl>branch_style5</styleUrl>
					<LineString>
						<tessellate>1</tessellate>
						<altitudeMode>relativeToGround</altitudeMode>
						<coordinates>						-102.78137355507063,50.04820954148628,826934.5723179257						 						-102.88830800380943,50.24381297997426,814773.7697838387						</coordinates>
					</LineString>
				</Placemark>
				<Placemark>
					<TimeSpan>
						<begin>2015-10-07</begin>
						<end></end>
					</TimeSpan>
					<styleUrl>branch_style5</styleUrl>
					<LineString>
						<tessellate>1</tessellate>
						<altitudeMode>relativeToGround</altitudeMode>
						<coordinates>						-102.88830800380943,50.24381297997426,814773.7697838387						 						-102.99491396052646,50.43941759981501,801875.9489143521						</coordinates>
					</LineString>
				</Placemark>
				<Placemark>
					<TimeSpan>
						<begin>2015-10-08</begin>
						<end></end>
					</TimeSpan>
					<styleUrl>branch_style5</styleUrl>
					<LineString>
						<tessellate>1</tessellate>
						<altitudeMode>relativeToGround</altitudeMode>
						<coordinates>						-102.99491396052646,50.43941759981501,801875.9489143521						 						-103.101186414613,50.635023437167426,788241.1097094663						</coordinates>
					</LineString>
				</Placemark>
				<Placemark>
					<TimeSpan>
						<begin>2015-10-09</begin>
						<end></end>
					</TimeSpan>
					<styleUrl>branch_style5</styleUrl>
					<LineString>
						<tessellate>1</tessellate>
						<altitudeMode>relativeToGround</altitudeMode>
						<coordinates>						-103.101186414613,50.635023437167426,788241.1097094663						 						-103.20712033249794,50.83063053032715,773869.2521691818						</coordinates>
					</LineString>
				</Placemark>
				<Placemark>
					<TimeSpan>
						<begin>2015-10-11</begin>
						<end></end>
					</TimeSpan>
					<styleUrl>branch_style5</styleUrl>
					<LineString>
						<tessellate>1</tessellate>
						<altitudeMode>relativeToGround</altitudeMode>
						<coordinates>						-103.20712033249794,50.83063053032715,773869.2521691818						 						-103.31271065684166,51.026238919940184,758760.3762934976						</coordinates>
					</LineString>
				</Placemark>
				<Placemark>
					<TimeSpan>
						<begin>2015-10-12</begin>
						<end></end>
					</TimeSpan>
					<styleUrl>branch_style5</styleUrl>
					<LineString>
						<tessellate>1</tessellate>
						<altitudeMode>relativeToGround</altitudeMode>
						<coordinates>						-103.31271065684166,51.026238919940184,758760.3762934976						 						-103.41795230554827,51.22184864924598,742914.4820824144						</coordinates>
					</LineString>
				</Placemark>
				<Placemark>
					<TimeSpan>
						<begin>2015-10-13</begin>
						<end></end>
					</TimeSpan>
					<styleUrl>branch_style5</styleUrl>
					<LineString>
						<tessellate>1</tessellate>
						<altitudeMode>relativeToGround</altitudeMode>
						<coordinates>						-103.41795230554827,51.22184864924598,742914.4820824144						 						-103.5228401705619,51.41745976435524,726331.5695359323						</coordinates>
					</LineString>
				</Placemark>
				<Placemark>
					<TimeSpan>
						<begin>2015-10-14</begin>
						<end></end>
					</TimeSpan>
					<styleUrl>branch_style5</styleUrl>
					<LineString>
						<tessellate>1</tessellate>
						<altitudeMode>relativeToGround</altitudeMode>
						<coordinates>						-103.5228401705619,51.41745976435524,726331.5695359323						 						-103.62736911640349,51.61307231456901,709011.6386540504						</coordinates>
					</LineString>
				</Placemark>
				<Placemark>
					<TimeSpan>
						<begin>2015-10-16</begin>
						<end></end>
					</TimeSpan>
					<styleUrl>branch_style5</styleUrl>
					<LineString>
						<tessellate>1</tessellate>
						<altitudeMode>relativeToGround</altitudeMode>
						<coordinates>						-103.62736911640349,51.61307231456901,709011.6386540504						 						-103.73153397839536,51.80868635274659,690954.6894367693						</coordinates>
					</LineString>
				</Placemark>
				<Placemark>
					<TimeSpan>
						<begin>2015-10-17</begin>
						<end></end>
					</TimeSpan>
					<styleUrl>branch_style5</styleUrl>
					<LineString>
						<tessellate>1</tessellate>
						<altitudeMode>relativeToGround</altitudeMode>
						<coordinates>						-103.73153397839536,51.80868635274659,690954.6894367693						 						-103.83532956050756,52.00430193573262,672160.7218840895						</coordinates>
					</LineString>
				</Placemark>
				<Placemark>
					<TimeSpan>
						<begin>2015-10-18</begin>
						<end></end>
					</TimeSpan>
					<styleUrl>branch_style5</styleUrl>
					<LineString>
						<tessellate>1</tessellate>
						<altitudeMode>relativeToGround</altitudeMode>
						<coordinates>						-103.83532956050756,52.00430193573262,672160.7218840895						 						-103.9387506327439,52.19991912485502,652629.7359960102						</coordinates>
					</LineString>
				</Placemark>
				<Placemark>
					<TimeSpan>
						<begin>2015-10-19</begin>
						<end></end>
					</TimeSpan>
					<styleUrl>branch_style5</styleUrl>
					<LineString>
						<tessellate>1</tessellate>
						<altitudeMode>relativeToGround</altitudeMode>
						<coordinates>						-103.9387506327439,52.19991912485502,652629.7359960102						 						-104.04179192796323,52.39553798650965,632361.7317725313						</coordinates>
					</LineString>
				</Placemark>
				<Placemark>
					<TimeSpan>
						<begin>2015-10-20</begin>
						<end></end>
					</TimeSpan>
					<styleUrl>branch_style5</styleUrl>
					<LineString>
						<tessellate>1</tessellate>
						<altitudeMode>relativeToGround</altitudeMode>
						<coordinates>						-104.04179192796323,52.39553798650965,632361.7317725313						 						-104.14444813800337,52.591158592851215,611356.7092136536						</coordinates>
					</LineString>
				</Placemark>
				<Placemark>
					<TimeSpan>
						<begin>2015-10-22</begin>
						<end></end>
					</TimeSpan>
					<styleUrl>branch_style5</styleUrl>
					<LineString>
						<tessellate>1</tessellate>
						<altitudeMode>relativeToGround</altitudeMode>
						<coordinates>						-104.14444813800337,52.591158592851215,611356.7092136536						 						-104.24671390893727,52.78678102261559,589614.6683193767						</coordinates>
					</LineString>
				</Placemark>
				<Placemark>
					<TimeSpan>
						<begin>2015-10-23</begin>
						<end></end>
					</TimeSpan>
					<styleUrl>branch_style5</styleUrl>
					<LineString>
						<tessellate>1</tessellate>
						<altitudeMode>relativeToGround</altitudeMode>
						<coordinates>						-104.24671390893727,52.78678102261559,589614.6683193767						 						-104.34858383523895,52.98240536210649,567135.6090897005						</coordinates>
					</LineString>
				</Placemark>
				<Placemark>
					<TimeSpan>
						<begin>2015-10-24</begin>
						<end></end>
					</TimeSpan>
					<styleUrl>branch_style5</styleUrl>
					<LineString>
						<tessellate>1</tessellate>
						<altitudeMode>relativeToGround</altitudeMode>
						<coordinates>						-104.34858383523895,52.98240536210649,567135.6090897005						 						-104.45005245256644,53.178031706389774,543919.5315246247						</coordinates>
					</LineString>
				</Placemark>
				<Placemark>
					<TimeSpan>
						<begin>2015-10-25</begin>
						<end></end>
					</TimeSpan>
					<styleUrl>branch_style5</styleUrl>
					<LineString>
						<tessellate>1</tessellate>
						<altitudeMode>relativeToGround</altitudeMode>
						<coordinates>						-104.45005245256644,53.178031706389774,543919.5315246247						 						-104.55111422877144,53.373660160752785,519966.43562415056						</coordinates>
					</LineString>
				</Placemark>
				<Placemark>
					<TimeSpan>
						<begin>2015-10-27</begin>
						<end></end>
					</TimeSpan>
					<styleUrl>branch_style5</styleUrl>
					<LineString>
						<tessellate>1</tessellate>
						<altitudeMode>relativeToGround</altitudeMode>
						<coordinates>						-104.55111422877144,53.373660160752785,519966.43562415056						 						-104.65176355260579,53.569290842506774,495276.3213882763						</coordinates>
					</LineString>
				</Placemark>
				<Placemark>
					<TimeSpan>
						<begin>2015-10-28</begin>
						<end></end>
					</TimeSpan>
					<styleUrl>branch_style5</styleUrl>
					<LineString>
						<tessellate>1</tessellate>
						<altitudeMode>relativeToGround</altitudeMode>
						<coordinates>						-104.65176355260579,53.569290842506774,495276.3213882763						 						-104.75199471939715,53.7649238832395,469849.1888170033						</coordinates>
					</LineString>
				</Placemark>
				<Placemark>
					<TimeSpan>
						<begin>2015-10-29</begin>
						<end></end>
					</TimeSpan>
					<styleUrl>branch_style5</styleUrl>
					<LineString>
						<tessellate>1</tessellate>
						<altitudeMode>relativeToGround</altitudeMode>
						<coordinates>						-104.75199471939715,53.7649238832395,469849.1888170033						 						-104.85180191267284,53.96055943166781,443685.03791033104						</coordinates>
					</LineString>
				</Placemark>
				<Placemark>
					<TimeSpan>
						<begin>2015-10-30</begin>
						<end></end>
					</TimeSpan>
					<styleUrl>branch_style5</styleUrl>
					<LineString>
						<tessellate>1</tessellate>
						<altitudeMode>relativeToGround</altitudeMode>
						<coordinates>						-104.85180191267284,53.96055943166781,443685.03791033104						 						-104.95117918027236,54.15619765730435,416783.8686682596						</coordinates>
					</LineString>
				</Placemark>
				<Placemark>
					<TimeSpan>
						<begin>2015-11-01</begin>
						<end></end>
					</TimeSpan>
					<styleUrl>branch_style5</styleUrl>
					<LineString>
						<tessellate>1</tessellate>
						<altitudeMode>relativeToGround</altitudeMode>
						<coordinates>						-104.95117918027236,54.15619765730435,416783.8686682596						 						-105.05012040281333,54.35183875525123,389145.68109078845						</coordinates>
					</LineString>
				</Placemark>
				<Placemark>
					<TimeSpan>
						<begin>2015-11-02</begin>
						<end></end>
					</TimeSpan>
					<styleUrl>branch_style5</styleUrl>
					<LineString>
						<tessellate>1</tessellate>
						<altitudeMode>relativeToGround</altitudeMode>
						<coordinates>						-105.05012040281333,54.35183875525123,389145.68109078845						 						-105.14861925130558,54.54748295258962,360770.47517791856						</coordinates>
					</LineString>
				</Placemark>
				<Placemark>
					<TimeSpan>
						<begin>2015-11-03</begin>
						<end></end>
					</TimeSpan>
					<styleUrl>branch_style5</styleUrl>
					<LineString>
						<tessellate>1</tessellate>
						<altitudeMode>relativeToGround</altitudeMode>
						<coordinates>						-105.14861925130558,54.54748295258962,360770.47517791856						 						-105.24666912895408,54.74313051709015,331658.25092964945						</coordinates>
					</LineString>
				</Placemark>
				<Placemark>
					<TimeSpan>
						<begin>2015-11-04</begin>
						<end></end>
					</TimeSpan>
					<styleUrl>branch_style5</styleUrl>
					<LineString>
						<tessellate>1</tessellate>
						<altitudeMode>relativeToGround</altitudeMode>
						<coordinates>						-105.24666912895408,54.74313051709015,331658.25092964945						 						-105.34426308921059,54.938781769403114,301809.0083459811						</coordinates>
					</LineString>
				</Placemark>
				<Placemark>
					<TimeSpan>
						<begin>2015-11-06</begin>
						<end></end>
					</TimeSpan>
					<styleUrl>branch_style5</styleUrl>
					<LineString>
						<tessellate>1</tessellate>
						<altitudeMode>relativeToGround</altitudeMode>
						<coordinates>						-105.34426308921059,54.938781769403114,301809.0083459811						 						-105.44139371682664,55.13443710065998,271222.7474269131						</coordinates>
					</LineString>
				</Placemark>
				<Placemark>
					<TimeSpan>
						<begin>2015-11-07</begin>
						<end></end>
					</TimeSpan>
					<styleUrl>branch_style5</styleUrl>
					<LineString>
						<tessellate>1</tessellate>
						<altitudeMode>relativeToGround</altitudeMode>
						<coordinates>						-105.44139371682664,55.13443710065998,271222.7474269131						 						-105.53805294870855,55.33009699886451,239899.46817244682						</coordinates>
					</LineString>
				</Placemark>
				<Placemark>
					<TimeSpan>
						<begin>2015-11-08</begin>
						<end></end>
					</TimeSpan>
					<styleUrl>branch_style5</styleUrl>
					<LineString>
						<tessellate>1</tessellate>
						<altitudeMode>relativeToGround</altitudeMode>
						<coordinates>						-105.53805294870855,55.33009699886451,239899.46817244682						 						-105.63423179145072,55.5257620903458,207839.17058258038						</coordinates>
					</LineString>
				</Placemark>
				<Placemark>
					<TimeSpan>
						<begin>2015-11-09</begin>
						<end></end>
					</TimeSpan>
					<styleUrl>branch_style5</styleUrl>
					<LineString>
						<tessellate>1</tessellate>
						<altitudeMode>relativeToGround</altitudeMode>
						<coordinates>						-105.63423179145072,55.5257620903458,207839.17058258038						 						-105.72991984923289,55.72143320881148,175041.85465731518						</coordinates>
					</LineString>
				</Placemark>
				<Placemark>
					<TimeSpan>
						<begin>2015-11-11</begin>
						<end></end>
					</TimeSpan>
					<styleUrl>branch_style5</styleUrl>
					<LineString>
						<tessellate>1</tessellate>
						<altitudeMode>relativeToGround</altitudeMode>
						<coordinates>						-105.72991984923289,55.72143320881148,175041.85465731518						 						-105.82510447204125,55.91711151957334,141507.5203966503						</coordinates>
					</LineString>
				</Placemark>
				<Placemark>
					<TimeSpan>
						<begin>2015-11-12</begin>
						<end></end>
					</TimeSpan>
					<styleUrl>branch_style5</styleUrl>
					<LineString>
						<tessellate>1</tessellate>
						<altitudeMode>relativeToGround</altitudeMode>
						<coordinates>						-105.82510447204125,55.91711151957334,141507.5203966503						 						-105.91976904875222,56.11279876783989,107236.16780058667						</coordinates>
					</LineString>
				</Placemark>
				<Placemark>
					<TimeSpan>
						<begin>2015-11-13</begin>
						<end></end>
					</TimeSpan>
					<styleUrl>branch_style5</styleUrl>
					<LineString>
						<tessellate>1</tessellate>
						<altitudeMode>relativeToGround</altitudeMode>
						<coordinates>						-105.91976904875222,56.11279876783989,107236.16780058667						 						-106.0138890176684,56.308497857641306,72227.79686912382						</coordinates>
					</LineString>
				</Placemark>
				<Placemark>
					<TimeSpan>
						<begin>2015-11-14</begin>
						<end></end>
					</TimeSpan>
					<styleUrl>branch_style5</styleUrl>
					<LineString>
						<tessellate>1</tessellate>
						<altitudeMode>relativeToGround</altitudeMode>
						<coordinates>						-106.0138890176684,56.308497857641306,72227.79686912382						 						-106.1074198809617,56.504214587114504,36482.407602261286						</coordinates>
					</LineString>
				</Placemark>
				<Placemark>
					<TimeSpan>
						<begin>2015-11-16</begin>
						<end></end>
					</TimeSpan>
					<styleUrl>branch_style5</styleUrl>
					<LineString>
						<tessellate>1</tessellate>
						<altitudeMode>relativeToGround</altitudeMode>
						<coordinates>						-106.1074198809617,56.504214587114504,36482.407602261286						 						-106.19999694824219,56.70000076293945,4.6566128730773926E-10						</coordinates>
					</LineString>
				</Placemark>
			</Folder>
			<Folder>
				<name>US:Ecuador</name>
				<Placemark>
					<TimeSpan>
						<begin>2015-01-02</begin>
						<end></end>
					</TimeSpan>
					<styleUrl>branch_style6</styleUrl>
					<LineString>
						<tessellate>1</tessellate>
						<altitudeMode>relativeToGround</altitudeMode>
						<coordinates>						-95.2300033569336,37.13999938964844,0.0						 						-95.10782846173349,36.74313711056891,74484.4944978834						</coordinates>
					</LineString>
				</Placemark>
				<Placemark>
					<TimeSpan>
						<begin>2015-01-05</begin>
						<end></end>
					</TimeSpan>
					<styleUrl>branch_style6</styleUrl>
					<LineString>
						<tessellate>1</tessellate>
						<altitudeMode>relativeToGround</altitudeMode>
						<coordinates>						-95.10782846173349,36.74313711056891,74484.4944978834						 						-94.98443659284266,36.3462773543169,147464.2517331833						</coordinates>
					</LineString>
				</Placemark>
				<Placemark>
					<TimeSpan>
						<begin>2015-01-08</begin>
						<end></end>
					</TimeSpan>
					<styleUrl>branch_style6</styleUrl>
					<LineString>
						<tessellate>1</tessellate>
						<altitudeMode>relativeToGround</altitudeMode>
						<coordinates>						-94.98443659284266,36.3462773543169,147464.2517331833						 						-94.85983084727792,35.94942014918442,218939.27170589968						</coordinates>
					</LineString>
				</Placemark>
				<Placemark>
					<TimeSpan>
						<begin>2015-01-11</begin>
						<end></end>
					</TimeSpan>
					<styleUrl>branch_style6</styleUrl>
					<LineString>
						<tessellate>1</tessellate>
						<altitudeMode>relativeToGround</altitudeMode>
						<coordinates>						-94.85983084727792,35.94942014918442,218939.27170589968						 						-94.73401454322494,35.55256552350484,288909.55441603257						</coordinates>
					</LineString>
				</Placemark>
				<Placemark>
					<TimeSpan>
						<begin>2015-01-15</begin>
						<end></end>
					</TimeSpan>
					<styleUrl>branch_style6</styleUrl>
					<LineString>
						<tessellate>1</tessellate>
						<altitudeMode>relativeToGround</altitudeMode>
						<coordinates>						-94.73401454322494,35.55256552350484,288909.55441603257						 						-94.60699122081532,35.15571350564364,357375.09986358194						</coordinates>
					</LineString>
				</Placemark>
				<Placemark>
					<TimeSpan>
						<begin>2015-01-18</begin>
						<end></end>
					</TimeSpan>
					<styleUrl>branch_style6</styleUrl>
					<LineString>
						<tessellate>1</tessellate>
						<altitudeMode>relativeToGround</altitudeMode>
						<coordinates>						-94.60699122081532,35.15571350564364,357375.09986358194						 						-94.4787646428484,34.7588641239889,424335.90804854786						</coordinates>
					</LineString>
				</Placemark>
				<Placemark>
					<TimeSpan>
						<begin>2015-01-21</begin>
						<end></end>
					</TimeSpan>
					<styleUrl>branch_style6</styleUrl>
					<LineString>
						<tessellate>1</tessellate>
						<altitudeMode>relativeToGround</altitudeMode>
						<coordinates>						-94.4787646428484,34.7588641239889,424335.90804854786						 						-94.34933879545655,34.36201740694186,489791.9789709302						</coordinates>
					</LineString>
				</Placemark>
				<Placemark>
					<TimeSpan>
						<begin>2015-01-24</begin>
						<end></end>
					</TimeSpan>
					<styleUrl>branch_style6</styleUrl>
					<LineString>
						<tessellate>1</tessellate>
						<altitudeMode>relativeToGround</altitudeMode>
						<coordinates>						-94.34933879545655,34.36201740694186,489791.9789709302						 						-94.21871788871353,33.965173382907295,553743.3126307292						</coordinates>
					</LineString>
				</Placemark>
				<Placemark>
					<TimeSpan>
						<begin>2015-01-27</begin>
						<end></end>
					</TimeSpan>
					<styleUrl>branch_style6</styleUrl>
					<LineString>
						<tessellate>1</tessellate>
						<altitudeMode>relativeToGround</altitudeMode>
						<coordinates>						-94.21871788871353,33.965173382907295,553743.3126307292						 						-94.08690635718456,33.56833208028374,616189.9090279446						</coordinates>
					</LineString>
				</Placemark>
				<Placemark>
					<TimeSpan>
						<begin>2015-01-31</begin>
						<end></end>
					</TimeSpan>
					<styleUrl>branch_style6</styleUrl>
					<LineString>
						<tessellate>1</tessellate>
						<altitudeMode>relativeToGround</altitudeMode>
						<coordinates>						-94.08690635718456,33.56833208028374,616189.9090279446						 						-93.95390886041764,33.17149352745377,677131.7681625764						</coordinates>
					</LineString>
				</Placemark>
				<Placemark>
					<TimeSpan>
						<begin>2015-02-03</begin>
						<end></end>
					</TimeSpan>
					<styleUrl>branch_style6</styleUrl>
					<LineString>
						<tessellate>1</tessellate>
						<altitudeMode>relativeToGround</altitudeMode>
						<coordinates>						-93.95390886041764,33.17149352745377,677131.7681625764						 						-93.81973028337543,32.77465775277403,736568.8900346247						</coordinates>
					</LineString>
				</Placemark>
				<Placemark>
					<TimeSpan>
						<begin>2015-02-06</begin>
						<end></end>
					</TimeSpan>
					<styleUrl>branch_style6</styleUrl>
					<LineString>
						<tessellate>1</tessellate>
						<altitudeMode>relativeToGround</altitudeMode>
						<coordinates>						-93.81973028337543,32.77465775277403,736568.8900346247						 						-93.68437573680649,32.37782478456521,794501.2746440896						</coordinates>
					</LineString>
				</Placemark>
				<Placemark>
					<TimeSpan>
						<begin>2015-02-09</begin>
						<end></end>
					</TimeSpan>
					<styleUrl>branch_style6</styleUrl>
					<LineString>
						<tessellate>1</tessellate>
						<altitudeMode>relativeToGround</altitudeMode>
						<coordinates>						-93.68437573680649,32.37782478456521,794501.2746440896						 						-93.54785055755563,31.980994651102005,850928.921990971						</coordinates>
					</LineString>
				</Placemark>
				<Placemark>
					<TimeSpan>
						<begin>2015-02-12</begin>
						<end></end>
					</TimeSpan>
					<styleUrl>branch_style6</styleUrl>
					<LineString>
						<tessellate>1</tessellate>
						<altitudeMode>relativeToGround</altitudeMode>
						<coordinates>						-93.54785055755563,31.980994651102005,850928.921990971						 						-93.41016030881242,31.58416738060282,905851.8320752688						</coordinates>
					</LineString>
				</Placemark>
				<Placemark>
					<TimeSpan>
						<begin>2015-02-16</begin>
						<end></end>
					</TimeSpan>
					<styleUrl>branch_style6</styleUrl>
					<LineString>
						<tessellate>1</tessellate>
						<altitudeMode>relativeToGround</altitudeMode>
						<coordinates>						-93.41016030881242,31.58416738060282,905851.8320752688						 						-93.27131078029697,31.18734300121948,959270.004896983						</coordinates>
					</LineString>
				</Placemark>
				<Placemark>
					<TimeSpan>
						<begin>2015-02-19</begin>
						<end></end>
					</TimeSpan>
					<styleUrl>branch_style6</styleUrl>
					<LineString>
						<tessellate>1</tessellate>
						<altitudeMode>relativeToGround</altitudeMode>
						<coordinates>						-93.27131078029697,31.18734300121948,959270.004896983						 						-93.13130798838283,30.79052154102682,1011183.440456114						</coordinates>
					</LineString>
				</Placemark>
				<Placemark>
					<TimeSpan>
						<begin>2015-02-22</begin>
						<end></end>
					</TimeSpan>
					<styleUrl>branch_style6</styleUrl>
					<LineString>
						<tessellate>1</tessellate>
						<altitudeMode>relativeToGround</altitudeMode>
						<coordinates>						-93.13130798838283,30.79052154102682,1011183.440456114						 						-92.99015817615575,30.393703028012116,1061592.1387526614						</coordinates>
					</LineString>
				</Placemark>
				<Placemark>
					<TimeSpan>
						<begin>2015-02-25</begin>
						<end></end>
					</TimeSpan>
					<styleUrl>branch_style6</styleUrl>
					<LineString>
						<tessellate>1</tessellate>
						<altitudeMode>relativeToGround</altitudeMode>
						<coordinates>						-92.99015817615575,30.393703028012116,1061592.1387526614						 						-92.84786781340826,29.99688749006444,1110496.0997866252						</coordinates>
					</LineString>
				</Placemark>
				<Placemark>
					<TimeSpan>
						<begin>2015-02-28</begin>
						<end></end>
					</TimeSpan>
					<styleUrl>branch_style6</styleUrl>
					<LineString>
						<tessellate>1</tessellate>
						<altitudeMode>relativeToGround</altitudeMode>
						<coordinates>						-92.84786781340826,29.99688749006444,1110496.0997866252						 						-92.70444359656904,29.600074954963947,1157895.3235580055						</coordinates>
					</LineString>
				</Placemark>
				<Placemark>
					<TimeSpan>
						<begin>2015-03-04</begin>
						<end></end>
					</TimeSpan>
					<styleUrl>branch_style6</styleUrl>
					<LineString>
						<tessellate>1</tessellate>
						<altitudeMode>relativeToGround</altitudeMode>
						<coordinates>						-92.70444359656904,29.600074954963947,1157895.3235580055						 						-92.55989244856667,29.203265450370942,1203789.8100668024						</coordinates>
					</LineString>
				</Placemark>
				<Placemark>
					<TimeSpan>
						<begin>2015-03-07</begin>
						<end></end>
					</TimeSpan>
					<styleUrl>branch_style6</styleUrl>
					<LineString>
						<tessellate>1</tessellate>
						<altitudeMode>relativeToGround</altitudeMode>
						<coordinates>						-92.55989244856667,29.203265450370942,1203789.8100668024						 						-92.41422151862733,28.806459003814968,1248179.559313016						</coordinates>
					</LineString>
				</Placemark>
				<Placemark>
					<TimeSpan>
						<begin>2015-03-10</begin>
						<end></end>
					</TimeSpan>
					<styleUrl>branch_style6</styleUrl>
					<LineString>
						<tessellate>1</tessellate>
						<altitudeMode>relativeToGround</altitudeMode>
						<coordinates>						-92.41422151862733,28.806459003814968,1248179.559313016						 						-92.26743818200579,28.409655642683646,1291064.5712966456						</coordinates>
					</LineString>
				</Placemark>
				<Placemark>
					<TimeSpan>
						<begin>2015-03-13</begin>
						<end></end>
					</TimeSpan>
					<styleUrl>branch_style6</styleUrl>
					<LineString>
						<tessellate>1</tessellate>
						<altitudeMode>relativeToGround</altitudeMode>
						<coordinates>						-92.26743818200579,28.409655642683646,1291064.5712966456						 						-92.11955003964913,28.01285539421149,1332444.8460176918						</coordinates>
					</LineString>
				</Placemark>
				<Placemark>
					<TimeSpan>
						<begin>2015-03-17</begin>
						<end></end>
					</TimeSpan>
					<styleUrl>branch_style6</styleUrl>
					<LineString>
						<tessellate>1</tessellate>
						<altitudeMode>relativeToGround</altitudeMode>
						<coordinates>						-92.11955003964913,28.01285539421149,1332444.8460176918						 						-91.97056491779304,27.616058285468558,1372320.3834761549						</coordinates>
					</LineString>
				</Placemark>
				<Placemark>
					<TimeSpan>
						<begin>2015-03-20</begin>
						<end></end>
					</TimeSpan>
					<styleUrl>branch_style6</styleUrl>
					<LineString>
						<tessellate>1</tessellate>
						<altitudeMode>relativeToGround</altitudeMode>
						<coordinates>						-91.97056491779304,27.616058285468558,1372320.3834761549						 						-91.82049086749007,27.21926434334895,1410691.1836720342						</coordinates>
					</LineString>
				</Placemark>
				<Placemark>
					<TimeSpan>
						<begin>2015-03-23</begin>
						<end></end>
					</TimeSpan>
					<styleUrl>branch_style6</styleUrl>
					<LineString>
						<tessellate>1</tessellate>
						<altitudeMode>relativeToGround</altitudeMode>
						<coordinates>						-91.82049086749007,27.21926434334895,1410691.1836720342						 						-91.6693361640693,26.822473594559252,1447557.24660533						</coordinates>
					</LineString>
				</Placemark>
				<Placemark>
					<TimeSpan>
						<begin>2015-03-26</begin>
						<end></end>
					</TimeSpan>
					<styleUrl>branch_style6</styleUrl>
					<LineString>
						<tessellate>1</tessellate>
						<altitudeMode>relativeToGround</altitudeMode>
						<coordinates>						-91.6693361640693,26.822473594559252,1447557.24660533						 						-91.51710930652735,26.42568606560677,1482918.572276042						</coordinates>
					</LineString>
				</Placemark>
				<Placemark>
					<TimeSpan>
						<begin>2015-03-29</begin>
						<end></end>
					</TimeSpan>
					<styleUrl>branch_style6</styleUrl>
					<LineString>
						<tessellate>1</tessellate>
						<altitudeMode>relativeToGround</altitudeMode>
						<coordinates>						-91.51710930652735,26.42568606560677,1482918.572276042						 						-91.3638190168502,26.02890178278764,1516775.1606841711						</coordinates>
					</LineString>
				</Placemark>
				<Placemark>
					<TimeSpan>
						<begin>2015-04-02</begin>
						<end></end>
					</TimeSpan>
					<styleUrl>branch_style6</styleUrl>
					<LineString>
						<tessellate>1</tessellate>
						<altitudeMode>relativeToGround</altitudeMode>
						<coordinates>						-91.3638190168502,26.02890178278764,1516775.1606841711						 						-91.20947423926565,25.632120772174844,1549127.0118297166						</coordinates>
					</LineString>
				</Placemark>
				<Placemark>
					<TimeSpan>
						<begin>2015-04-05</begin>
						<end></end>
					</TimeSpan>
					<styleUrl>branch_style6</styleUrl>
					<LineString>
						<tessellate>1</tessellate>
						<altitudeMode>relativeToGround</altitudeMode>
						<coordinates>						-91.20947423926565,25.632120772174844,1549127.0118297166						 						-91.05408413942595,25.235343059606,1579974.1257126778						</coordinates>
					</LineString>
				</Placemark>
				<Placemark>
					<TimeSpan>
						<begin>2015-04-08</begin>
						<end></end>
					</TimeSpan>
					<styleUrl>branch_style6</styleUrl>
					<LineString>
						<tessellate>1</tessellate>
						<altitudeMode>relativeToGround</altitudeMode>
						<coordinates>						-91.05408413942595,25.235343059606,1579974.1257126778						 						-90.89765810352078,24.838568670671016,1609316.5023330564						</coordinates>
					</LineString>
				</Placemark>
				<Placemark>
					<TimeSpan>
						<begin>2015-04-11</begin>
						<end></end>
					</TimeSpan>
					<styleUrl>branch_style6</styleUrl>
					<LineString>
						<tessellate>1</tessellate>
						<altitudeMode>relativeToGround</altitudeMode>
						<coordinates>						-90.89765810352078,24.838568670671016,1609316.5023330564						 						-90.74020573731984,24.441797630699615,1637154.1416908512						</coordinates>
					</LineString>
				</Placemark>
				<Placemark>
					<TimeSpan>
						<begin>2015-04-14</begin>
						<end></end>
					</TimeSpan>
					<styleUrl>branch_style6</styleUrl>
					<LineString>
						<tessellate>1</tessellate>
						<altitudeMode>relativeToGround</altitudeMode>
						<coordinates>						-90.74020573731984,24.441797630699615,1637154.1416908512						 						-90.58173686514493,24.045029964748625,1663487.0437860629						</coordinates>
					</LineString>
				</Placemark>
				<Placemark>
					<TimeSpan>
						<begin>2015-04-18</begin>
						<end></end>
					</TimeSpan>
					<styleUrl>branch_style6</styleUrl>
					<LineString>
						<tessellate>1</tessellate>
						<altitudeMode>relativeToGround</altitudeMode>
						<coordinates>						-90.58173686514493,24.045029964748625,1663487.0437860629						 						-90.42226152877228,23.648265697589142,1688315.2086186907						</coordinates>
					</LineString>
				</Placemark>
				<Placemark>
					<TimeSpan>
						<begin>2015-04-21</begin>
						<end></end>
					</TimeSpan>
					<styleUrl>branch_style6</styleUrl>
					<LineString>
						<tessellate>1</tessellate>
						<altitudeMode>relativeToGround</altitudeMode>
						<coordinates>						-90.42226152877228,23.648265697589142,1688315.2086186907						 						-90.26178998626355,23.25150485369341,1711638.6361887346						</coordinates>
					</LineString>
				</Placemark>
				<Placemark>
					<TimeSpan>
						<begin>2015-04-24</begin>
						<end></end>
					</TimeSpan>
					<styleUrl>branch_style6</styleUrl>
					<LineString>
						<tessellate>1</tessellate>
						<altitudeMode>relativeToGround</altitudeMode>
						<coordinates>						-90.26178998626355,23.25150485369341,1711638.6361887346						 						-90.10033271072678,22.85474745722158,1733457.3264961955						</coordinates>
					</LineString>
				</Placemark>
				<Placemark>
					<TimeSpan>
						<begin>2015-04-27</begin>
						<end></end>
					</TimeSpan>
					<styleUrl>branch_style6</styleUrl>
					<LineString>
						<tessellate>1</tessellate>
						<altitudeMode>relativeToGround</altitudeMode>
						<coordinates>						-90.10033271072678,22.85474745722158,1733457.3264961955						 						-89.9379003890064,22.457993532008196,1753771.279541073						</coordinates>
					</LineString>
				</Placemark>
				<Placemark>
					<TimeSpan>
						<begin>2015-05-01</begin>
						<end></end>
					</TimeSpan>
					<styleUrl>branch_style6</styleUrl>
					<LineString>
						<tessellate>1</tessellate>
						<altitudeMode>relativeToGround</altitudeMode>
						<coordinates>						-89.9379003890064,22.457993532008196,1753771.279541073						 						-89.77450392030285,22.06124310154845,1772580.4953233663						</coordinates>
					</LineString>
				</Placemark>
				<Placemark>
					<TimeSpan>
						<begin>2015-05-04</begin>
						<end></end>
					</TimeSpan>
					<styleUrl>branch_style6</styleUrl>
					<LineString>
						<tessellate>1</tessellate>
						<altitudeMode>relativeToGround</altitudeMode>
						<coordinates>						-89.77450392030285,22.06124310154845,1772580.4953233663						 						-89.6101544147212,21.664496188984167,1789884.9738430767						</coordinates>
					</LineString>
				</Placemark>
				<Placemark>
					<TimeSpan>
						<begin>2015-05-07</begin>
						<end></end>
					</TimeSpan>
					<styleUrl>branch_style6</styleUrl>
					<LineString>
						<tessellate>1</tessellate>
						<altitudeMode>relativeToGround</altitudeMode>
						<coordinates>						-89.6101544147212,21.664496188984167,1789884.9738430767						 						-89.44486319174989,21.267752817089526,1805684.7151002036						</coordinates>
					</LineString>
				</Placemark>
				<Placemark>
					<TimeSpan>
						<begin>2015-05-10</begin>
						<end></end>
					</TimeSpan>
					<styleUrl>branch_style6</styleUrl>
					<LineString>
						<tessellate>1</tessellate>
						<altitudeMode>relativeToGround</altitudeMode>
						<coordinates>						-89.44486319174989,21.267752817089526,1805684.7151002036						 						-89.27864177866863,20.871013008256483,1819979.719094747						</coordinates>
					</LineString>
				</Placemark>
				<Placemark>
					<TimeSpan>
						<begin>2015-05-13</begin>
						<end></end>
					</TimeSpan>
					<styleUrl>branch_style6</styleUrl>
					<LineString>
						<tessellate>1</tessellate>
						<altitudeMode>relativeToGround</altitudeMode>
						<coordinates>						-89.27864177866863,20.871013008256483,1819979.719094747						 						-89.11150190888611,20.474276784479848,1832769.985826707						</coordinates>
					</LineString>
				</Placemark>
				<Placemark>
					<TimeSpan>
						<begin>2015-05-17</begin>
						<end></end>
					</TimeSpan>
					<styleUrl>branch_style6</styleUrl>
					<LineString>
						<tessellate>1</tessellate>
						<altitudeMode>relativeToGround</altitudeMode>
						<coordinates>						-89.11150190888611,20.474276784479848,1832769.985826707						 						-88.94345552020798,20.077544167342012,1844055.515296083						</coordinates>
					</LineString>
				</Placemark>
				<Placemark>
					<TimeSpan>
						<begin>2015-05-20</begin>
						<end></end>
					</TimeSpan>
					<styleUrl>branch_style6</styleUrl>
					<LineString>
						<tessellate>1</tessellate>
						<altitudeMode>relativeToGround</altitudeMode>
						<coordinates>						-88.94345552020798,20.077544167342012,1844055.515296083						 						-88.77451475303496,19.680815177997335,1853836.3075028758						</coordinates>
					</LineString>
				</Placemark>
				<Placemark>
					<TimeSpan>
						<begin>2015-05-23</begin>
						<end></end>
					</TimeSpan>
					<styleUrl>branch_style6</styleUrl>
					<LineString>
						<tessellate>1</tessellate>
						<altitudeMode>relativeToGround</altitudeMode>
						<coordinates>						-88.77451475303496,19.680815177997335,1853836.3075028758						 						-88.60469194849131,19.28408983715603,1862112.362447085						</coordinates>
					</LineString>
				</Placemark>
				<Placemark>
					<TimeSpan>
						<begin>2015-05-26</begin>
						<end></end>
					</TimeSpan>
					<styleUrl>branch_style6</styleUrl>
					<LineString>
						<tessellate>1</tessellate>
						<altitudeMode>relativeToGround</altitudeMode>
						<coordinates>						-88.60469194849131,19.28408983715603,1862112.362447085						 						-88.43399964648444,18.88736816506767,1868883.6801287106						</coordinates>
					</LineString>
				</Placemark>
				<Placemark>
					<TimeSpan>
						<begin>2015-05-29</begin>
						<end></end>
					</TimeSpan>
					<styleUrl>branch_style6</styleUrl>
					<LineString>
						<tessellate>1</tessellate>
						<altitudeMode>relativeToGround</altitudeMode>
						<coordinates>						-88.43399964648444,18.88736816506767,1868883.6801287106						 						-88.26245058369547,18.490650181504137,1874150.260547753						</coordinates>
					</LineString>
				</Placemark>
				<Placemark>
					<TimeSpan>
						<begin>2015-06-02</begin>
						<end></end>
					</TimeSpan>
					<styleUrl>branch_style6</styleUrl>
					<LineString>
						<tessellate>1</tessellate>
						<altitudeMode>relativeToGround</altitudeMode>
						<coordinates>						-88.26245058369547,18.490650181504137,1874150.260547753						 						-88.09005769150177,18.09393590574205,1877912.1037042118						</coordinates>
					</LineString>
				</Placemark>
				<Placemark>
					<TimeSpan>
						<begin>2015-06-05</begin>
						<end></end>
					</TimeSpan>
					<styleUrl>branch_style6</styleUrl>
					<LineString>
						<tessellate>1</tessellate>
						<altitudeMode>relativeToGround</altitudeMode>
						<coordinates>						-88.09005769150177,18.09393590574205,1877912.1037042118						 						-87.91683409383144,17.697225356544575,1880169.2095980872						</coordinates>
					</LineString>
				</Placemark>
				<Placemark>
					<TimeSpan>
						<begin>2015-06-08</begin>
						<end></end>
					</TimeSpan>
					<styleUrl>branch_style6</styleUrl>
					<LineString>
						<tessellate>1</tessellate>
						<altitudeMode>relativeToGround</altitudeMode>
						<coordinates>						-87.91683409383144,17.697225356544575,1880169.2095980872						 						-87.74279310495054,17.30051855214254,1880921.5782293791						</coordinates>
					</LineString>
				</Placemark>
				<Placemark>
					<TimeSpan>
						<begin>2015-06-11</begin>
						<end></end>
					</TimeSpan>
					<styleUrl>branch_style6</styleUrl>
					<LineString>
						<tessellate>1</tessellate>
						<altitudeMode>relativeToGround</altitudeMode>
						<coordinates>						-87.74279310495054,17.30051855214254,1880921.5782293791						 						-87.56794822718354,16.90381551021488,1880169.209598087						</coordinates>
					</LineString>
				</Placemark>
				<Placemark>
					<TimeSpan>
						<begin>2015-06-14</begin>
						<end></end>
					</TimeSpan>
					<styleUrl>branch_style6</styleUrl>
					<LineString>
						<tessellate>1</tessellate>
						<altitudeMode>relativeToGround</altitudeMode>
						<coordinates>						-87.56794822718354,16.90381551021488,1880169.209598087						 						-87.39231314856764,16.50711624786815,1877912.1037042118						</coordinates>
					</LineString>
				</Placemark>
				<Placemark>
					<TimeSpan>
						<begin>2015-06-18</begin>
						<end></end>
					</TimeSpan>
					<styleUrl>branch_style6</styleUrl>
					<LineString>
						<tessellate>1</tessellate>
						<altitudeMode>relativeToGround</altitudeMode>
						<coordinates>						-87.39231314856764,16.50711624786815,1877912.1037042118						 						-87.2159017404416,16.110420781615254,1874150.260547753						</coordinates>
					</LineString>
				</Placemark>
				<Placemark>
					<TimeSpan>
						<begin>2015-06-21</begin>
						<end></end>
					</TimeSpan>
					<styleUrl>branch_style6</styleUrl>
					<LineString>
						<tessellate>1</tessellate>
						<altitudeMode>relativeToGround</altitudeMode>
						<coordinates>						-87.2159017404416,16.110420781615254,1874150.260547753						 						-87.0387280549699,15.713729127353032,1868883.6801287103						</coordinates>
					</LineString>
				</Placemark>
				<Placemark>
					<TimeSpan>
						<begin>2015-06-24</begin>
						<end></end>
					</TimeSpan>
					<styleUrl>branch_style6</styleUrl>
					<LineString>
						<tessellate>1</tessellate>
						<altitudeMode>relativeToGround</altitudeMode>
						<coordinates>						-87.0387280549699,15.713729127353032,1868883.6801287103						 						-86.86080632260314,15.31704130033883,1862112.3624470849						</coordinates>
					</LineString>
				</Placemark>
				<Placemark>
					<TimeSpan>
						<begin>2015-06-27</begin>
						<end></end>
					</TimeSpan>
					<styleUrl>branch_style6</styleUrl>
					<LineString>
						<tessellate>1</tessellate>
						<altitudeMode>relativeToGround</altitudeMode>
						<coordinates>						-86.86080632260314,15.31704130033883,1862112.3624470849						 						-86.68215094947521,14.920357315165742,1853836.3075028756						</coordinates>
					</LineString>
				</Placemark>
				<Placemark>
					<TimeSpan>
						<begin>2015-07-01</begin>
						<end></end>
					</TimeSpan>
					<styleUrl>branch_style6</styleUrl>
					<LineString>
						<tessellate>1</tessellate>
						<altitudeMode>relativeToGround</altitudeMode>
						<coordinates>						-86.68215094947521,14.920357315165742,1853836.3075028756						 						-86.50277651473861,14.523677185736409,1844055.515296083						</coordinates>
					</LineString>
				</Placemark>
				<Placemark>
					<TimeSpan>
						<begin>2015-07-04</begin>
						<end></end>
					</TimeSpan>
					<styleUrl>branch_style6</styleUrl>
					<LineString>
						<tessellate>1</tessellate>
						<altitudeMode>relativeToGround</altitudeMode>
						<coordinates>						-86.50277651473861,14.523677185736409,1844055.515296083						 						-86.32269776783849,14.127000925235333,1832769.985826707						</coordinates>
					</LineString>
				</Placemark>
				<Placemark>
					<TimeSpan>
						<begin>2015-07-07</begin>
						<end></end>
					</TimeSpan>
					<styleUrl>branch_style6</styleUrl>
					<LineString>
						<tessellate>1</tessellate>
						<altitudeMode>relativeToGround</altitudeMode>
						<coordinates>						-86.32269776783849,14.127000925235333,1832769.985826707						 						-86.14192962572712,13.730328546099303,1819979.7190947472						</coordinates>
					</LineString>
				</Placemark>
				<Placemark>
					<TimeSpan>
						<begin>2015-07-10</begin>
						<end></end>
					</TimeSpan>
					<styleUrl>branch_style6</styleUrl>
					<LineString>
						<tessellate>1</tessellate>
						<altitudeMode>relativeToGround</altitudeMode>
						<coordinates>						-86.14192962572712,13.730328546099303,1819979.7190947472						 						-85.96048717001925,13.333660059985856,1805684.7151002032						</coordinates>
					</LineString>
				</Placemark>
				<Placemark>
					<TimeSpan>
						<begin>2015-07-13</begin>
						<end></end>
					</TimeSpan>
					<styleUrl>branch_style6</styleUrl>
					<LineString>
						<tessellate>1</tessellate>
						<altitudeMode>relativeToGround</altitudeMode>
						<coordinates>						-85.96048717001925,13.333660059985856,1805684.7151002032						 						-85.77838564409042,12.936995477739451,1789884.9738430767						</coordinates>
					</LineString>
				</Placemark>
				<Placemark>
					<TimeSpan>
						<begin>2015-07-17</begin>
						<end></end>
					</TimeSpan>
					<styleUrl>branch_style6</styleUrl>
					<LineString>
						<tessellate>1</tessellate>
						<altitudeMode>relativeToGround</altitudeMode>
						<coordinates>						-85.77838564409042,12.936995477739451,1789884.9738430767						 						-85.59564045011926,12.54033480935505,1772580.4953233665						</coordinates>
					</LineString>
				</Placemark>
				<Placemark>
					<TimeSpan>
						<begin>2015-07-20</begin>
						<end></end>
					</TimeSpan>
					<styleUrl>branch_style6</styleUrl>
					<LineString>
						<tessellate>1</tessellate>
						<altitudeMode>relativeToGround</altitudeMode>
						<coordinates>						-85.59564045011926,12.54033480935505,1772580.4953233665						 						-85.41226714607511,12.14367806393879,1753771.279541073						</coordinates>
					</LineString>
				</Placemark>
				<Placemark>
					<TimeSpan>
						<begin>2015-07-23</begin>
						<end></end>
					</TimeSpan>
					<styleUrl>branch_style6</styleUrl>
					<LineString>
						<tessellate>1</tessellate>
						<altitudeMode>relativeToGround</altitudeMode>
						<coordinates>						-85.41226714607511,12.14367806393879,1753771.279541073						 						-85.22828144265341,11.747025249665281,1733457.3264961955						</coordinates>
					</LineString>
				</Placemark>
				<Placemark>
					<TimeSpan>
						<begin>2015-07-26</begin>
						<end></end>
					</TimeSpan>
					<styleUrl>branch_style6</styleUrl>
					<LineString>
						<tessellate>1</tessellate>
						<altitudeMode>relativeToGround</altitudeMode>
						<coordinates>						-85.22828144265341,11.747025249665281,1733457.3264961955						 						-85.04369920015999,11.350376373731086,1711638.6361887348						</coordinates>
					</LineString>
				</Placemark>
				<Placemark>
					<TimeSpan>
						<begin>2015-07-29</begin>
						<end></end>
					</TimeSpan>
					<styleUrl>branch_style6</styleUrl>
					<LineString>
						<tessellate>1</tessellate>
						<altitudeMode>relativeToGround</altitudeMode>
						<coordinates>						-85.04369920015999,11.350376373731086,1711638.6361887348						 						-84.85853642534695,10.953731442303825,1688315.2086186907						</coordinates>
					</LineString>
				</Placemark>
				<Placemark>
					<TimeSpan>
						<begin>2015-08-02</begin>
						<end></end>
					</TimeSpan>
					<styleUrl>branch_style6</styleUrl>
					<LineString>
						<tessellate>1</tessellate>
						<altitudeMode>relativeToGround</altitudeMode>
						<coordinates>						-84.85853642534695,10.953731442303825,1688315.2086186907						 						-84.67280926820179,10.55709046046622,1663487.0437860629						</coordinates>
					</LineString>
				</Placemark>
				<Placemark>
					<TimeSpan>
						<begin>2015-08-05</begin>
						<end></end>
					</TimeSpan>
					<styleUrl>branch_style6</styleUrl>
					<LineString>
						<tessellate>1</tessellate>
						<altitudeMode>relativeToGround</altitudeMode>
						<coordinates>						-84.67280926820179,10.55709046046622,1663487.0437860629						 						-84.48653401869325,10.160453432154283,1637154.1416908517						</coordinates>
					</LineString>
				</Placemark>
				<Placemark>
					<TimeSpan>
						<begin>2015-08-08</begin>
						<end></end>
					</TimeSpan>
					<styleUrl>branch_style6</styleUrl>
					<LineString>
						<tessellate>1</tessellate>
						<altitudeMode>relativeToGround</altitudeMode>
						<coordinates>						-84.48653401869325,10.160453432154283,1637154.1416908517						 						-84.29972710347607,9.763820360088769,1609316.5023330562						</coordinates>
					</LineString>
				</Placemark>
				<Placemark>
					<TimeSpan>
						<begin>2015-08-11</begin>
						<end></end>
					</TimeSpan>
					<styleUrl>branch_style6</styleUrl>
					<LineString>
						<tessellate>1</tessellate>
						<altitudeMode>relativeToGround</altitudeMode>
						<coordinates>						-84.29972710347607,9.763820360088769,1609316.5023330562						 						-84.11240508255852,9.367191245698724,1579974.1257126778						</coordinates>
					</LineString>
				</Placemark>
				<Placemark>
					<TimeSpan>
						<begin>2015-08-14</begin>
						<end></end>
					</TimeSpan>
					<styleUrl>branch_style6</styleUrl>
					<LineString>
						<tessellate>1</tessellate>
						<altitudeMode>relativeToGround</altitudeMode>
						<coordinates>						-84.11240508255852,9.367191245698724,1579974.1257126778						 						-83.92458464593592,8.970566089035819,1549127.0118297162						</coordinates>
					</LineString>
				</Placemark>
				<Placemark>
					<TimeSpan>
						<begin>2015-08-18</begin>
						<end></end>
					</TimeSpan>
					<styleUrl>branch_style6</styleUrl>
					<LineString>
						<tessellate>1</tessellate>
						<altitudeMode>relativeToGround</altitudeMode>
						<coordinates>						-83.92458464593592,8.970566089035819,1549127.0118297162						 						-83.73628261019536,8.573944888677849,1516775.1606841711						</coordinates>
					</LineString>
				</Placemark>
				<Placemark>
					<TimeSpan>
						<begin>2015-08-21</begin>
						<end></end>
					</TimeSpan>
					<styleUrl>branch_style6</styleUrl>
					<LineString>
						<tessellate>1</tessellate>
						<altitudeMode>relativeToGround</altitudeMode>
						<coordinates>						-83.73628261019536,8.573944888677849,1516775.1606841711						 						-83.54751591509613,8.177327641619435,1482918.5722760423						</coordinates>
					</LineString>
				</Placemark>
				<Placemark>
					<TimeSpan>
						<begin>2015-08-24</begin>
						<end></end>
					</TimeSpan>
					<styleUrl>branch_style6</styleUrl>
					<LineString>
						<tessellate>1</tessellate>
						<altitudeMode>relativeToGround</altitudeMode>
						<coordinates>						-83.54751591509613,8.177327641619435,1482918.5722760423						 						-83.35830162013242,7.7807143431475385,1447557.2466053301						</coordinates>
					</LineString>
				</Placemark>
				<Placemark>
					<TimeSpan>
						<begin>2015-08-27</begin>
						<end></end>
					</TimeSpan>
					<styleUrl>branch_style6</styleUrl>
					<LineString>
						<tessellate>1</tessellate>
						<altitudeMode>relativeToGround</altitudeMode>
						<coordinates>						-83.35830162013242,7.7807143431475385,1447557.2466053301						 						-83.16865690108503,7.384104986698828,1410691.1836720342						</coordinates>
					</LineString>
				</Placemark>
				<Placemark>
					<TimeSpan>
						<begin>2015-08-31</begin>
						<end></end>
					</TimeSpan>
					<styleUrl>branch_style6</styleUrl>
					<LineString>
						<tessellate>1</tessellate>
						<altitudeMode>relativeToGround</altitudeMode>
						<coordinates>						-83.16865690108503,7.384104986698828,1410691.1836720342						 						-82.97859904657108,6.987499563695232,1372320.383476154						</coordinates>
					</LineString>
				</Placemark>
				<Placemark>
					<TimeSpan>
						<begin>2015-09-03</begin>
						<end></end>
					</TimeSpan>
					<styleUrl>branch_style6</styleUrl>
					<LineString>
						<tessellate>1</tessellate>
						<altitudeMode>relativeToGround</altitudeMode>
						<coordinates>						-82.97859904657108,6.987499563695232,1372320.383476154						 						-82.78814545460249,6.5908980633531105,1332444.8460176913						</coordinates>
					</LineString>
				</Placemark>
				<Placemark>
					<TimeSpan>
						<begin>2015-09-06</begin>
						<end></end>
					</TimeSpan>
					<styleUrl>branch_style6</styleUrl>
					<LineString>
						<tessellate>1</tessellate>
						<altitudeMode>relativeToGround</altitudeMode>
						<coordinates>						-82.78814545460249,6.5908980633531105,1332444.8460176913						 						-82.59731362916601,6.194300472460282,1291064.5712966453						</coordinates>
					</LineString>
				</Placemark>
				<Placemark>
					<TimeSpan>
						<begin>2015-09-09</begin>
						<end></end>
					</TimeSpan>
					<styleUrl>branch_style6</styleUrl>
					<LineString>
						<tessellate>1</tessellate>
						<altitudeMode>relativeToGround</altitudeMode>
						<coordinates>						-82.59731362916601,6.194300472460282,1291064.5712966453						 						-82.406121176841,5.797706775113535,1248179.559313016						</coordinates>
					</LineString>
				</Placemark>
				<Placemark>
					<TimeSpan>
						<begin>2015-09-12</begin>
						<end></end>
					</TimeSpan>
					<styleUrl>branch_style6</styleUrl>
					<LineString>
						<tessellate>1</tessellate>
						<altitudeMode>relativeToGround</altitudeMode>
						<coordinates>						-82.406121176841,5.797706775113535,1248179.559313016						 						-82.21458580347597,5.401116952407186,1203789.8100668024						</coordinates>
					</LineString>
				</Placemark>
				<Placemark>
					<TimeSpan>
						<begin>2015-09-16</begin>
						<end></end>
					</TimeSpan>
					<styleUrl>branch_style6</styleUrl>
					<LineString>
						<tessellate>1</tessellate>
						<altitudeMode>relativeToGround</altitudeMode>
						<coordinates>						-82.21458580347597,5.401116952407186,1203789.8100668024						 						-82.02272531095001,5.004530982060413,1157895.3235580055						</coordinates>
					</LineString>
				</Placemark>
				<Placemark>
					<TimeSpan>
						<begin>2015-09-19</begin>
						<end></end>
					</TimeSpan>
					<styleUrl>branch_style6</styleUrl>
					<LineString>
						<tessellate>1</tessellate>
						<altitudeMode>relativeToGround</altitudeMode>
						<coordinates>						-82.02272531095001,5.004530982060413,1157895.3235580055						 						-81.83055759405336,4.607948837967201,1110496.0997866252						</coordinates>
					</LineString>
				</Placemark>
				<Placemark>
					<TimeSpan>
						<begin>2015-09-22</begin>
						<end></end>
					</TimeSpan>
					<styleUrl>branch_style6</styleUrl>
					<LineString>
						<tessellate>1</tessellate>
						<altitudeMode>relativeToGround</altitudeMode>
						<coordinates>						-81.83055759405336,4.607948837967201,1110496.0997866252						 						-81.6381006375328,4.211370489647326,1061592.1387526616						</coordinates>
					</LineString>
				</Placemark>
				<Placemark>
					<TimeSpan>
						<begin>2015-09-25</begin>
						<end></end>
					</TimeSpan>
					<styleUrl>branch_style6</styleUrl>
					<LineString>
						<tessellate>1</tessellate>
						<altitudeMode>relativeToGround</altitudeMode>
						<coordinates>						-81.6381006375328,4.211370489647326,1061592.1387526616						 						-81.44537251336217,3.8147959015692656,1011183.4404561147						</coordinates>
					</LineString>
				</Placemark>
				<Placemark>
					<TimeSpan>
						<begin>2015-09-28</begin>
						<end></end>
					</TimeSpan>
					<styleUrl>branch_style6</styleUrl>
					<LineString>
						<tessellate>1</tessellate>
						<altitudeMode>relativeToGround</altitudeMode>
						<coordinates>						-81.44537251336217,3.8147959015692656,1011183.4404561147						 						-81.25239137832195,3.4182250323049197,959270.0048969826						</coordinates>
					</LineString>
				</Placemark>
				<Placemark>
					<TimeSpan>
						<begin>2015-10-02</begin>
						<end></end>
					</TimeSpan>
					<styleUrl>branch_style6</styleUrl>
					<LineString>
						<tessellate>1</tessellate>
						<altitudeMode>relativeToGround</altitudeMode>
						<coordinates>						-81.25239137832195,3.4182250323049197,959270.0048969826						 						-81.05917547200293,3.0216578334600284,905851.832075269						</coordinates>
					</LineString>
				</Placemark>
				<Placemark>
					<TimeSpan>
						<begin>2015-10-05</begin>
						<end></end>
					</TimeSpan>
					<styleUrl>branch_style6</styleUrl>
					<LineString>
						<tessellate>1</tessellate>
						<altitudeMode>relativeToGround</altitudeMode>
						<coordinates>						-81.05917547200293,3.0216578334600284,905851.832075269						 						-80.86574311539968,2.625094248300127,850928.9219909711						</coordinates>
					</LineString>
				</Placemark>
				<Placemark>
					<TimeSpan>
						<begin>2015-10-08</begin>
						<end></end>
					</TimeSpan>
					<styleUrl>branch_style6</styleUrl>
					<LineString>
						<tessellate>1</tessellate>
						<altitudeMode>relativeToGround</altitudeMode>
						<coordinates>						-80.86574311539968,2.625094248300127,850928.9219909711						 						-80.6721127103337,2.2285342099548626,794501.2746440899						</coordinates>
					</LineString>
				</Placemark>
				<Placemark>
					<TimeSpan>
						<begin>2015-10-11</begin>
						<end></end>
					</TimeSpan>
					<styleUrl>branch_style6</styleUrl>
					<LineString>
						<tessellate>1</tessellate>
						<altitudeMode>relativeToGround</altitudeMode>
						<coordinates>						-80.6721127103337,2.2285342099548626,794501.2746440899						 						-80.47830274006645,1.831977639024923,736568.8900346253						</coordinates>
					</LineString>
				</Placemark>
				<Placemark>
					<TimeSpan>
						<begin>2015-10-14</begin>
						<end></end>
					</TimeSpan>
					<styleUrl>branch_style6</styleUrl>
					<LineString>
						<tessellate>1</tessellate>
						<altitudeMode>relativeToGround</altitudeMode>
						<coordinates>						-80.47830274006645,1.831977639024923,736568.8900346253						 						-80.28433177165746,1.435424440319987,677131.7681625765						</coordinates>
					</LineString>
				</Placemark>
				<Placemark>
					<TimeSpan>
						<begin>2015-10-18</begin>
						<end></end>
					</TimeSpan>
					<styleUrl>branch_style6</styleUrl>
					<LineString>
						<tessellate>1</tessellate>
						<altitudeMode>relativeToGround</altitudeMode>
						<coordinates>						-80.28433177165746,1.435424440319987,677131.7681625765						 						-80.09021846095597,1.0388744982931355,616189.9090279453						</coordinates>
					</LineString>
				</Placemark>
				<Placemark>
					<TimeSpan>
						<begin>2015-10-21</begin>
						<end></end>
					</TimeSpan>
					<styleUrl>branch_style6</styleUrl>
					<LineString>
						<tessellate>1</tessellate>
						<altitudeMode>relativeToGround</altitudeMode>
						<coordinates>						-80.09021846095597,1.0388744982931355,616189.9090279453						 						-79.89598156170395,0.6423276704475095,553743.3126307288						</coordinates>
					</LineString>
				</Placemark>
				<Placemark>
					<TimeSpan>
						<begin>2015-10-24</begin>
						<end></end>
					</TimeSpan>
					<styleUrl>branch_style6</styleUrl>
					<LineString>
						<tessellate>1</tessellate>
						<altitudeMode>relativeToGround</altitudeMode>
						<coordinates>						-79.89598156170395,0.6423276704475095,553743.3126307288						 						-79.70163994133897,0.24578377744786867,489791.97897093						</coordinates>
					</LineString>
				</Placemark>
				<Placemark>
					<TimeSpan>
						<begin>2015-10-27</begin>
						<end></end>
					</TimeSpan>
					<styleUrl>branch_style6</styleUrl>
					<LineString>
						<tessellate>1</tessellate>
						<altitudeMode>relativeToGround</altitudeMode>
						<coordinates>						-79.70163994133897,0.24578377744786867,489791.97897093						 						-79.50721260829901,-0.1507574124165056,424335.9080485478						</coordinates>
					</LineString>
				</Placemark>
				<Placemark>
					<TimeSpan>
						<begin>2015-10-30</begin>
						<end></end>
					</TimeSpan>
					<styleUrl>branch_style6</styleUrl>
					<LineString>
						<tessellate>1</tessellate>
						<altitudeMode>relativeToGround</altitudeMode>
						<coordinates>						-79.50721260829901,-0.1507574124165056,424335.9080485478						 						-79.31271876043624,-0.5472962091244721,357375.0998635823						</coordinates>
					</LineString>
				</Placemark>
				<Placemark>
					<TimeSpan>
						<begin>2015-11-03</begin>
						<end></end>
					</TimeSpan>
					<styleUrl>branch_style6</styleUrl>
					<LineString>
						<tessellate>1</tessellate>
						<altitudeMode>relativeToGround</altitudeMode>
						<coordinates>						-79.31271876043624,-0.5472962091244721,357375.0998635823						 						-79.11817787567271,-0.9438330475260418,288909.5544160325						</coordinates>
					</LineString>
				</Placemark>
				<Placemark>
					<TimeSpan>
						<begin>2015-11-06</begin>
						<end></end>
					</TimeSpan>
					<styleUrl>branch_style6</styleUrl>
					<LineString>
						<tessellate>1</tessellate>
						<altitudeMode>relativeToGround</altitudeMode>
						<coordinates>						-79.11817787567271,-0.9438330475260418,288909.5544160325						 						-78.92360989773042,-1.3403685805415393,218939.2717058994						</coordinates>
					</LineString>
				</Placemark>
				<Placemark>
					<TimeSpan>
						<begin>2015-11-09</begin>
						<end></end>
					</TimeSpan>
					<styleUrl>branch_style6</styleUrl>
					<LineString>
						<tessellate>1</tessellate>
						<altitudeMode>relativeToGround</altitudeMode>
						<coordinates>						-78.92360989773042,-1.3403685805415393,218939.2717058994						 						-78.72903567544093,-1.736903896610634,147464.25173318386						</coordinates>
					</LineString>
				</Placemark>
				<Placemark>
					<TimeSpan>
						<begin>2015-11-12</begin>
						<end></end>
					</TimeSpan>
					<styleUrl>branch_style6</styleUrl>
					<LineString>
						<tessellate>1</tessellate>
						<altitudeMode>relativeToGround</altitudeMode>
						<coordinates>						-78.72903567544093,-1.736903896610634,147464.25173318386						 						-78.5344782896776,-2.133441171990044,74484.49449788406						</coordinates>
					</LineString>
				</Placemark>
				<Placemark>
					<TimeSpan>
						<begin>2015-11-16</begin>
						<end></end>
					</TimeSpan>
					<styleUrl>branch_style6</styleUrl>
					<LineString>
						<tessellate>1</tessellate>
						<altitudeMode>relativeToGround</altitudeMode>
						<coordinates>						-78.5344782896776,-2.133441171990044,74484.49449788406						 						-78.33999633789062,-2.5299999713897705,9.313225746154785E-10						</coordinates>
					</LineString>
				</Placemark>
			</Folder>
			<Folder>
				<name>US:Mexico</name>
				<Placemark>
					<TimeSpan>
						<begin>2013-12-26</begin>
						<end></end>
					</TimeSpan>
					<styleUrl>branch_style7</styleUrl>
					<LineString>
						<tessellate>1</tessellate>
						<altitudeMode>relativeToGround</altitudeMode>
						<coordinates>						-95.2300033569336,37.13999938964844,0.0						 						-95.2940331377907,37.0023748016298,26275.306628536637						</coordinates>
					</LineString>
				</Placemark>
				<Placemark>
					<TimeSpan>
						<begin>2013-12-29</begin>
						<end></end>
					</TimeSpan>
					<styleUrl>branch_style7</styleUrl>
					<LineString>
						<tessellate>1</tessellate>
						<altitudeMode>relativeToGround</altitudeMode>
						<coordinates>						-95.2940331377907,37.0023748016298,26275.306628536637						 						-95.35822936355173,36.864750497039964,52019.7989817493						</coordinates>
					</LineString>
				</Placemark>
				<Placemark>
					<TimeSpan>
						<begin>2014-01-01</begin>
						<end></end>
					</TimeSpan>
					<styleUrl>branch_style7</styleUrl>
					<LineString>
						<tessellate>1</tessellate>
						<altitudeMode>relativeToGround</altitudeMode>
						<coordinates>						-95.35822936355173,36.864750497039964,52019.7989817493						 						-95.42259132877685,36.72712647855865,77233.477059638						</coordinates>
					</LineString>
				</Placemark>
				<Placemark>
					<TimeSpan>
						<begin>2014-01-05</begin>
						<end></end>
					</TimeSpan>
					<styleUrl>branch_style7</styleUrl>
					<LineString>
						<tessellate>1</tessellate>
						<altitudeMode>relativeToGround</altitudeMode>
						<coordinates>						-95.42259132877685,36.72712647855865,77233.477059638						 						-95.48711832386059,36.58950274890557,101916.34086220272						</coordinates>
					</LineString>
				</Placemark>
				<Placemark>
					<TimeSpan>
						<begin>2014-01-08</begin>
						<end></end>
					</TimeSpan>
					<styleUrl>branch_style7</styleUrl>
					<LineString>
						<tessellate>1</tessellate>
						<altitudeMode>relativeToGround</altitudeMode>
						<coordinates>						-95.48711832386059,36.58950274890557,101916.34086220272						 						-95.5518096350662,36.451879310841676,126068.39038944346						</coordinates>
					</LineString>
				</Placemark>
				<Placemark>
					<TimeSpan>
						<begin>2014-01-11</begin>
						<end></end>
					</TimeSpan>
					<styleUrl>branch_style7</styleUrl>
					<LineString>
						<tessellate>1</tessellate>
						<altitudeMode>relativeToGround</altitudeMode>
						<coordinates>						-95.5518096350662,36.451879310841676,126068.39038944346						 						-95.61666454456048,36.31425616717037,149689.62564136024						</coordinates>
					</LineString>
				</Placemark>
				<Placemark>
					<TimeSpan>
						<begin>2014-01-14</begin>
						<end></end>
					</TimeSpan>
					<styleUrl>branch_style7</styleUrl>
					<LineString>
						<tessellate>1</tessellate>
						<altitudeMode>relativeToGround</altitudeMode>
						<coordinates>						-95.61666454456048,36.31425616717037,149689.62564136024						 						-95.68168233044862,36.17663332073889,172780.04661795302						</coordinates>
					</LineString>
				</Placemark>
				<Placemark>
					<TimeSpan>
						<begin>2014-01-18</begin>
						<end></end>
					</TimeSpan>
					<styleUrl>branch_style7</styleUrl>
					<LineString>
						<tessellate>1</tessellate>
						<altitudeMode>relativeToGround</altitudeMode>
						<coordinates>						-95.68168233044862,36.17663332073889,172780.04661795302						 						-95.74686226680957,36.039010774439646,195339.65331922186						</coordinates>
					</LineString>
				</Placemark>
				<Placemark>
					<TimeSpan>
						<begin>2014-01-21</begin>
						<end></end>
					</TimeSpan>
					<styleUrl>branch_style7</styleUrl>
					<LineString>
						<tessellate>1</tessellate>
						<altitudeMode>relativeToGround</altitudeMode>
						<coordinates>						-95.74686226680957,36.039010774439646,195339.65331922186						 						-95.81220362373138,35.90138853121166,217368.44574516674						</coordinates>
					</LineString>
				</Placemark>
				<Placemark>
					<TimeSpan>
						<begin>2014-01-24</begin>
						<end></end>
					</TimeSpan>
					<styleUrl>branch_style7</styleUrl>
					<LineString>
						<tessellate>1</tessellate>
						<altitudeMode>relativeToGround</altitudeMode>
						<coordinates>						-95.81220362373138,35.90138853121166,217368.44574516674						 						-95.87770566734709,35.763766594042096,238866.4238957876						</coordinates>
					</LineString>
				</Placemark>
				<Placemark>
					<TimeSpan>
						<begin>2014-01-28</begin>
						<end></end>
					</TimeSpan>
					<styleUrl>branch_style7</styleUrl>
					<LineString>
						<tessellate>1</tessellate>
						<altitudeMode>relativeToGround</altitudeMode>
						<coordinates>						-95.87770566734709,35.763766594042096,238866.4238957876						 						-95.94336765987069,35.62614496596782,259833.5877710845						</coordinates>
					</LineString>
				</Placemark>
				<Placemark>
					<TimeSpan>
						<begin>2014-01-31</begin>
						<end></end>
					</TimeSpan>
					<styleUrl>branch_style7</styleUrl>
					<LineString>
						<tessellate>1</tessellate>
						<altitudeMode>relativeToGround</altitudeMode>
						<coordinates>						-95.94336765987069,35.62614496596782,259833.5877710845						 						-96.00918885963343,35.488523650077,280269.93737105746						</coordinates>
					</LineString>
				</Placemark>
				<Placemark>
					<TimeSpan>
						<begin>2014-02-03</begin>
						<end></end>
					</TimeSpan>
					<styleUrl>branch_style7</styleUrl>
					<LineString>
						<tessellate>1</tessellate>
						<altitudeMode>relativeToGround</altitudeMode>
						<coordinates>						-96.00918885963343,35.488523650077,280269.93737105746						 						-96.07516852112036,35.35090264951088,300175.4726957064						</coordinates>
					</LineString>
				</Placemark>
				<Placemark>
					<TimeSpan>
						<begin>2014-02-06</begin>
						<end></end>
					</TimeSpan>
					<styleUrl>branch_style7</styleUrl>
					<LineString>
						<tessellate>1</tessellate>
						<altitudeMode>relativeToGround</altitudeMode>
						<coordinates>						-96.07516852112036,35.35090264951088,300175.4726957064						 						-96.14130589500735,35.21328196746556,319550.19374503137						</coordinates>
					</LineString>
				</Placemark>
				<Placemark>
					<TimeSpan>
						<begin>2014-02-10</begin>
						<end></end>
					</TimeSpan>
					<styleUrl>branch_style7</styleUrl>
					<LineString>
						<tessellate>1</tessellate>
						<altitudeMode>relativeToGround</altitudeMode>
						<coordinates>						-96.14130589500735,35.21328196746556,319550.19374503137						 						-96.20760022819807,35.075661607193894,338394.10051903245						</coordinates>
					</LineString>
				</Placemark>
				<Placemark>
					<TimeSpan>
						<begin>2014-02-13</begin>
						<end></end>
					</TimeSpan>
					<styleUrl>branch_style7</styleUrl>
					<LineString>
						<tessellate>1</tessellate>
						<altitudeMode>relativeToGround</altitudeMode>
						<coordinates>						-96.20760022819807,35.075661607193894,338394.10051903245						 						-96.27405076386171,34.93804157200741,356707.1930177095						</coordinates>
					</LineString>
				</Placemark>
				<Placemark>
					<TimeSpan>
						<begin>2014-02-16</begin>
						<end></end>
					</TimeSpan>
					<styleUrl>branch_style7</styleUrl>
					<LineString>
						<tessellate>1</tessellate>
						<altitudeMode>relativeToGround</altitudeMode>
						<coordinates>						-96.27405076386171,34.93804157200741,356707.1930177095						 						-96.34065674147061,34.800421865278466,374489.47124106257						</coordinates>
					</LineString>
				</Placemark>
				<Placemark>
					<TimeSpan>
						<begin>2014-02-20</begin>
						<end></end>
					</TimeSpan>
					<styleUrl>branch_style7</styleUrl>
					<LineString>
						<tessellate>1</tessellate>
						<altitudeMode>relativeToGround</altitudeMode>
						<coordinates>						-96.34065674147061,34.800421865278466,374489.47124106257						 						-96.40741739683845,34.66280249044236,391740.9351890917						</coordinates>
					</LineString>
				</Placemark>
				<Placemark>
					<TimeSpan>
						<begin>2014-02-23</begin>
						<end></end>
					</TimeSpan>
					<styleUrl>branch_style7</styleUrl>
					<LineString>
						<tessellate>1</tessellate>
						<altitudeMode>relativeToGround</altitudeMode>
						<coordinates>						-96.40741739683845,34.66280249044236,391740.9351890917						 						-96.47433196215871,34.525183450999606,408461.5848617968						</coordinates>
					</LineString>
				</Placemark>
				<Placemark>
					<TimeSpan>
						<begin>2014-02-26</begin>
						<end></end>
					</TimeSpan>
					<styleUrl>branch_style7</styleUrl>
					<LineString>
						<tessellate>1</tessellate>
						<altitudeMode>relativeToGround</altitudeMode>
						<coordinates>						-96.47433196215871,34.525183450999606,408461.5848617968						 						-96.54139966604343,34.38756475051837,424651.4202591779						</coordinates>
					</LineString>
				</Placemark>
				<Placemark>
					<TimeSpan>
						<begin>2014-03-01</begin>
						<end></end>
					</TimeSpan>
					<styleUrl>branch_style7</styleUrl>
					<LineString>
						<tessellate>1</tessellate>
						<altitudeMode>relativeToGround</altitudeMode>
						<coordinates>						-96.54139966604343,34.38756475051837,424651.4202591779						 						-96.60861973356242,34.24994639263694,440310.44138123514						</coordinates>
					</LineString>
				</Placemark>
				<Placemark>
					<TimeSpan>
						<begin>2014-03-05</begin>
						<end></end>
					</TimeSpan>
					<styleUrl>branch_style7</styleUrl>
					<LineString>
						<tessellate>1</tessellate>
						<altitudeMode>relativeToGround</altitudeMode>
						<coordinates>						-96.60861973356242,34.24994639263694,440310.44138123514						 						-96.67599138628289,34.112328381066405,455438.6482279683						</coordinates>
					</LineString>
				</Placemark>
				<Placemark>
					<TimeSpan>
						<begin>2014-03-08</begin>
						<end></end>
					</TimeSpan>
					<styleUrl>branch_style7</styleUrl>
					<LineString>
						<tessellate>1</tessellate>
						<altitudeMode>relativeToGround</altitudeMode>
						<coordinates>						-96.67599138628289,34.112328381066405,455438.6482279683						 						-96.74351384230921,33.974710719593396,470036.04079937766						</coordinates>
					</LineString>
				</Placemark>
				<Placemark>
					<TimeSpan>
						<begin>2014-03-11</begin>
						<end></end>
					</TimeSpan>
					<styleUrl>branch_style7</styleUrl>
					<LineString>
						<tessellate>1</tessellate>
						<altitudeMode>relativeToGround</altitudeMode>
						<coordinates>						-96.74351384230921,33.974710719593396,470036.04079937766						 						-96.81118631632346,33.83709341208305,484102.6190954629						</coordinates>
					</LineString>
				</Placemark>
				<Placemark>
					<TimeSpan>
						<begin>2014-03-15</begin>
						<end></end>
					</TimeSpan>
					<styleUrl>branch_style7</styleUrl>
					<LineString>
						<tessellate>1</tessellate>
						<altitudeMode>relativeToGround</altitudeMode>
						<coordinates>						-96.81118631632346,33.83709341208305,484102.6190954629						 						-96.87900801962604,33.69947646248204,497638.3831162242						</coordinates>
					</LineString>
				</Placemark>
				<Placemark>
					<TimeSpan>
						<begin>2014-03-18</begin>
						<end></end>
					</TimeSpan>
					<styleUrl>branch_style7</styleUrl>
					<LineString>
						<tessellate>1</tessellate>
						<altitudeMode>relativeToGround</altitudeMode>
						<coordinates>						-96.87900801962604,33.69947646248204,497638.3831162242						 						-96.9469781601769,33.5618598748219,510643.33286166145						</coordinates>
					</LineString>
				</Placemark>
				<Placemark>
					<TimeSpan>
						<begin>2014-03-21</begin>
						<end></end>
					</TimeSpan>
					<styleUrl>branch_style7</styleUrl>
					<LineString>
						<tessellate>1</tessellate>
						<altitudeMode>relativeToGround</altitudeMode>
						<coordinates>						-96.9469781601769,33.5618598748219,510643.33286166145						 						-97.01509594263732,33.42424365322236,523117.4683317748						</coordinates>
					</LineString>
				</Placemark>
				<Placemark>
					<TimeSpan>
						<begin>2014-03-24</begin>
						<end></end>
					</TimeSpan>
					<styleUrl>branch_style7</styleUrl>
					<LineString>
						<tessellate>1</tessellate>
						<altitudeMode>relativeToGround</altitudeMode>
						<coordinates>						-97.01509594263732,33.42424365322236,523117.4683317748						 						-97.08336056841202,33.28662780189503,535060.7895265642						</coordinates>
					</LineString>
				</Placemark>
				<Placemark>
					<TimeSpan>
						<begin>2014-03-28</begin>
						<end></end>
					</TimeSpan>
					<styleUrl>branch_style7</styleUrl>
					<LineString>
						<tessellate>1</tessellate>
						<altitudeMode>relativeToGround</altitudeMode>
						<coordinates>						-97.08336056841202,33.28662780189503,535060.7895265642						 						-97.1517712356918,33.14901232514719,546473.2964460297						</coordinates>
					</LineString>
				</Placemark>
				<Placemark>
					<TimeSpan>
						<begin>2014-03-31</begin>
						<end></end>
					</TimeSpan>
					<styleUrl>branch_style7</styleUrl>
					<LineString>
						<tessellate>1</tessellate>
						<altitudeMode>relativeToGround</altitudeMode>
						<coordinates>						-97.1517712356918,33.14901232514719,546473.2964460297						 						-97.22032713949685,33.0113972273858,557354.9890901711						</coordinates>
					</LineString>
				</Placemark>
				<Placemark>
					<TimeSpan>
						<begin>2014-04-03</begin>
						<end></end>
					</TimeSpan>
					<styleUrl>branch_style7</styleUrl>
					<LineString>
						<tessellate>1</tessellate>
						<altitudeMode>relativeToGround</altitudeMode>
						<coordinates>						-97.22032713949685,33.0113972273858,557354.9890901711						 						-97.28902747172047,32.87378251312178,567705.8674589886						</coordinates>
					</LineString>
				</Placemark>
				<Placemark>
					<TimeSpan>
						<begin>2014-04-07</begin>
						<end></end>
					</TimeSpan>
					<styleUrl>branch_style7</styleUrl>
					<LineString>
						<tessellate>1</tessellate>
						<altitudeMode>relativeToGround</altitudeMode>
						<coordinates>						-97.28902747172047,32.87378251312178,567705.8674589886						 						-97.3578714211737,32.73616818697456,577525.9315524821						</coordinates>
					</LineString>
				</Placemark>
				<Placemark>
					<TimeSpan>
						<begin>2014-04-10</begin>
						<end></end>
					</TimeSpan>
					<styleUrl>branch_style7</styleUrl>
					<LineString>
						<tessellate>1</tessellate>
						<altitudeMode>relativeToGround</altitudeMode>
						<coordinates>						-97.3578714211737,32.73616818697456,577525.9315524821						 						-97.42685817362998,32.598554253676795,586815.1813706516						</coordinates>
					</LineString>
				</Placemark>
				<Placemark>
					<TimeSpan>
						<begin>2014-04-13</begin>
						<end></end>
					</TimeSpan>
					<styleUrl>branch_style7</styleUrl>
					<LineString>
						<tessellate>1</tessellate>
						<altitudeMode>relativeToGround</altitudeMode>
						<coordinates>						-97.42685817362998,32.598554253676795,586815.1813706516						 						-97.49598691187127,32.460940718079485,595573.616913497						</coordinates>
					</LineString>
				</Placemark>
				<Placemark>
					<TimeSpan>
						<begin>2014-04-16</begin>
						<end></end>
					</TimeSpan>
					<styleUrl>branch_style7</styleUrl>
					<LineString>
						<tessellate>1</tessellate>
						<altitudeMode>relativeToGround</altitudeMode>
						<coordinates>						-97.49598691187127,32.460940718079485,595573.616913497						 						-97.56525681573441,32.32332758515733,603801.2381810185						</coordinates>
					</LineString>
				</Placemark>
				<Placemark>
					<TimeSpan>
						<begin>2014-04-20</begin>
						<end></end>
					</TimeSpan>
					<styleUrl>branch_style7</styleUrl>
					<LineString>
						<tessellate>1</tessellate>
						<altitudeMode>relativeToGround</altitudeMode>
						<coordinates>						-97.56525681573441,32.32332758515733,603801.2381810185						 						-97.63466706215824,32.185714860014436,611498.0451732163						</coordinates>
					</LineString>
				</Placemark>
				<Placemark>
					<TimeSpan>
						<begin>2014-04-23</begin>
						<end></end>
					</TimeSpan>
					<styleUrl>branch_style7</styleUrl>
					<LineString>
						<tessellate>1</tessellate>
						<altitudeMode>relativeToGround</altitudeMode>
						<coordinates>						-97.63466706215824,32.185714860014436,611498.0451732163						 						-97.70421682523195,32.048102547890394,618664.0378900899						</coordinates>
					</LineString>
				</Placemark>
				<Placemark>
					<TimeSpan>
						<begin>2014-04-26</begin>
						<end></end>
					</TimeSpan>
					<styleUrl>branch_style7</styleUrl>
					<LineString>
						<tessellate>1</tessellate>
						<altitudeMode>relativeToGround</altitudeMode>
						<coordinates>						-97.70421682523195,32.048102547890394,618664.0378900899						 						-97.77390527624377,31.910490654166736,625299.2163316396						</coordinates>
					</LineString>
				</Placemark>
				<Placemark>
					<TimeSpan>
						<begin>2014-04-29</begin>
						<end></end>
					</TimeSpan>
					<styleUrl>branch_style7</styleUrl>
					<LineString>
						<tessellate>1</tessellate>
						<altitudeMode>relativeToGround</altitudeMode>
						<coordinates>						-97.77390527624377,31.910490654166736,625299.2163316396						 						-97.84373158373111,31.772879184373775,631403.5804978652						</coordinates>
					</LineString>
				</Placemark>
				<Placemark>
					<TimeSpan>
						<begin>2014-05-03</begin>
						<end></end>
					</TimeSpan>
					<styleUrl>branch_style7</styleUrl>
					<LineString>
						<tessellate>1</tessellate>
						<altitudeMode>relativeToGround</altitudeMode>
						<coordinates>						-97.84373158373111,31.772879184373775,631403.5804978652						 						-97.91369491353151,31.63526814419801,636977.1303887669						</coordinates>
					</LineString>
				</Placemark>
				<Placemark>
					<TimeSpan>
						<begin>2014-05-06</begin>
						<end></end>
					</TimeSpan>
					<styleUrl>branch_style7</styleUrl>
					<LineString>
						<tessellate>1</tessellate>
						<altitudeMode>relativeToGround</altitudeMode>
						<coordinates>						-97.91369491353151,31.63526814419801,636977.1303887669						 						-97.98379442883454,31.49765753948987,642019.8660043445						</coordinates>
					</LineString>
				</Placemark>
				<Placemark>
					<TimeSpan>
						<begin>2014-05-09</begin>
						<end></end>
					</TimeSpan>
					<styleUrl>branch_style7</styleUrl>
					<LineString>
						<tessellate>1</tessellate>
						<altitudeMode>relativeToGround</altitudeMode>
						<coordinates>						-97.98379442883454,31.49765753948987,642019.8660043445						 						-98.05402929023522,31.360047376272057,646531.7873445983						</coordinates>
					</LineString>
				</Placemark>
				<Placemark>
					<TimeSpan>
						<begin>2014-05-13</begin>
						<end></end>
					</TimeSpan>
					<styleUrl>branch_style7</styleUrl>
					<LineString>
						<tessellate>1</tessellate>
						<altitudeMode>relativeToGround</altitudeMode>
						<coordinates>						-98.05402929023522,31.360047376272057,646531.7873445983						 						-98.12439865578864,31.222437660748557,650512.8944095281						</coordinates>
					</LineString>
				</Placemark>
				<Placemark>
					<TimeSpan>
						<begin>2014-05-16</begin>
						<end></end>
					</TimeSpan>
					<styleUrl>branch_style7</styleUrl>
					<LineString>
						<tessellate>1</tessellate>
						<altitudeMode>relativeToGround</altitudeMode>
						<coordinates>						-98.12439865578864,31.222437660748557,650512.8944095281						 						-98.19490168106567,31.08482839931412,653963.1871991339						</coordinates>
					</LineString>
				</Placemark>
				<Placemark>
					<TimeSpan>
						<begin>2014-05-19</begin>
						<end></end>
					</TimeSpan>
					<styleUrl>branch_style7</styleUrl>
					<LineString>
						<tessellate>1</tessellate>
						<altitudeMode>relativeToGround</altitudeMode>
						<coordinates>						-98.19490168106567,31.08482839931412,653963.1871991339						 						-98.26553751921062,30.947219598564498,656882.665713416						</coordinates>
					</LineString>
				</Placemark>
				<Placemark>
					<TimeSpan>
						<begin>2014-05-22</begin>
						<end></end>
					</TimeSpan>
					<styleUrl>branch_style7</styleUrl>
					<LineString>
						<tessellate>1</tessellate>
						<altitudeMode>relativeToGround</altitudeMode>
						<coordinates>						-98.26553751921062,30.947219598564498,656882.665713416						 						-98.33630532100032,30.809611265307495,659271.3299523739						</coordinates>
					</LineString>
				</Placemark>
				<Placemark>
					<TimeSpan>
						<begin>2014-05-26</begin>
						<end></end>
					</TimeSpan>
					<styleUrl>branch_style7</styleUrl>
					<LineString>
						<tessellate>1</tessellate>
						<altitudeMode>relativeToGround</altitudeMode>
						<coordinates>						-98.33630532100032,30.809611265307495,659271.3299523739						 						-98.4072042349049,30.672003406574714,661129.1799160077						</coordinates>
					</LineString>
				</Placemark>
				<Placemark>
					<TimeSpan>
						<begin>2014-05-29</begin>
						<end></end>
					</TimeSpan>
					<styleUrl>branch_style7</styleUrl>
					<LineString>
						<tessellate>1</tessellate>
						<altitudeMode>relativeToGround</altitudeMode>
						<coordinates>						-98.4072042349049,30.672003406574714,661129.1799160077						 						-98.47823340715088,30.534396029634276,662456.2156043176						</coordinates>
					</LineString>
				</Placemark>
				<Placemark>
					<TimeSpan>
						<begin>2014-06-01</begin>
						<end></end>
					</TimeSpan>
					<styleUrl>branch_style7</styleUrl>
					<LineString>
						<tessellate>1</tessellate>
						<altitudeMode>relativeToGround</altitudeMode>
						<coordinates>						-98.47823340715088,30.534396029634276,662456.2156043176						 						-98.54939198178586,30.396789142004504,663252.4370173035						</coordinates>
					</LineString>
				</Placemark>
				<Placemark>
					<TimeSpan>
						<begin>2014-06-05</begin>
						<end></end>
					</TimeSpan>
					<styleUrl>branch_style7</styleUrl>
					<LineString>
						<tessellate>1</tessellate>
						<altitudeMode>relativeToGround</altitudeMode>
						<coordinates>						-98.54939198178586,30.396789142004504,663252.4370173035						 						-98.62067910074616,30.259182751468654,663517.8441549655						</coordinates>
					</LineString>
				</Placemark>
				<Placemark>
					<TimeSpan>
						<begin>2014-06-08</begin>
						<end></end>
					</TimeSpan>
					<styleUrl>branch_style7</styleUrl>
					<LineString>
						<tessellate>1</tessellate>
						<altitudeMode>relativeToGround</altitudeMode>
						<coordinates>						-98.62067910074616,30.259182751468654,663517.8441549655						 						-98.69209390392653,30.121576866090845,663252.4370173035						</coordinates>
					</LineString>
				</Placemark>
				<Placemark>
					<TimeSpan>
						<begin>2014-06-11</begin>
						<end></end>
					</TimeSpan>
					<styleUrl>branch_style7</styleUrl>
					<LineString>
						<tessellate>1</tessellate>
						<altitudeMode>relativeToGround</altitudeMode>
						<coordinates>						-98.69209390392653,30.121576866090845,663252.4370173035						 						-98.76363552925301,29.983971494233348,662456.2156043175						</coordinates>
					</LineString>
				</Placemark>
				<Placemark>
					<TimeSpan>
						<begin>2014-06-14</begin>
						<end></end>
					</TimeSpan>
					<styleUrl>branch_style7</styleUrl>
					<LineString>
						<tessellate>1</tessellate>
						<altitudeMode>relativeToGround</altitudeMode>
						<coordinates>						-98.76363552925301,29.983971494233348,662456.2156043175						 						-98.8353031127587,29.846366644575173,661129.1799160076						</coordinates>
					</LineString>
				</Placemark>
				<Placemark>
					<TimeSpan>
						<begin>2014-06-18</begin>
						<end></end>
					</TimeSpan>
					<styleUrl>branch_style7</styleUrl>
					<LineString>
						<tessellate>1</tessellate>
						<altitudeMode>relativeToGround</altitudeMode>
						<coordinates>						-98.8353031127587,29.846366644575173,661129.1799160076						 						-98.90709578866301,29.70876232613244,659271.3299523736						</coordinates>
					</LineString>
				</Placemark>
				<Placemark>
					<TimeSpan>
						<begin>2014-06-21</begin>
						<end></end>
					</TimeSpan>
					<styleUrl>branch_style7</styleUrl>
					<LineString>
						<tessellate>1</tessellate>
						<altitudeMode>relativeToGround</altitudeMode>
						<coordinates>						-98.90709578866301,29.70876232613244,659271.3299523736						 						-98.97901268945495,29.571158548280334,656882.6657134157						</coordinates>
					</LineString>
				</Placemark>
				<Placemark>
					<TimeSpan>
						<begin>2014-06-24</begin>
						<end></end>
					</TimeSpan>
					<styleUrl>branch_style7</styleUrl>
					<LineString>
						<tessellate>1</tessellate>
						<altitudeMode>relativeToGround</altitudeMode>
						<coordinates>						-98.97901268945495,29.571158548280334,656882.6657134157						 						-99.05105294598039,29.43355532077714,653963.1871991339						</coordinates>
					</LineString>
				</Placemark>
				<Placemark>
					<TimeSpan>
						<begin>2014-06-28</begin>
						<end></end>
					</TimeSpan>
					<styleUrl>branch_style7</styleUrl>
					<LineString>
						<tessellate>1</tessellate>
						<altitudeMode>relativeToGround</altitudeMode>
						<coordinates>						-99.05105294598039,29.43355532077714,653963.1871991339						 						-99.123215687534,29.295952653790394,650512.894409528						</coordinates>
					</LineString>
				</Placemark>
				<Placemark>
					<TimeSpan>
						<begin>2014-07-01</begin>
						<end></end>
					</TimeSpan>
					<styleUrl>branch_style7</styleUrl>
					<LineString>
						<tessellate>1</tessellate>
						<altitudeMode>relativeToGround</altitudeMode>
						<coordinates>						-99.123215687534,29.295952653790394,650512.894409528						 						-99.19550004195676,29.15835055792553,646531.7873445984						</coordinates>
					</LineString>
				</Placemark>
				<Placemark>
					<TimeSpan>
						<begin>2014-07-04</begin>
						<end></end>
					</TimeSpan>
					<styleUrl>branch_style7</styleUrl>
					<LineString>
						<tessellate>1</tessellate>
						<altitudeMode>relativeToGround</altitudeMode>
						<coordinates>						-99.19550004195676,29.15835055792553,646531.7873445984						 						-99.26790513573897,29.020749044257226,642019.8660043447						</coordinates>
					</LineString>
				</Placemark>
				<Placemark>
					<TimeSpan>
						<begin>2014-07-07</begin>
						<end></end>
					</TimeSpan>
					<styleUrl>branch_style7</styleUrl>
					<LineString>
						<tessellate>1</tessellate>
						<altitudeMode>relativeToGround</altitudeMode>
						<coordinates>						-99.26790513573897,29.020749044257226,642019.8660043447						 						-99.34043009413001,28.88314812436379,636977.1303887669						</coordinates>
					</LineString>
				</Placemark>
				<Placemark>
					<TimeSpan>
						<begin>2014-07-11</begin>
						<end></end>
					</TimeSpan>
					<styleUrl>branch_style7</styleUrl>
					<LineString>
						<tessellate>1</tessellate>
						<altitudeMode>relativeToGround</altitudeMode>
						<coordinates>						-99.34043009413001,28.88314812436379,636977.1303887669						 						-99.41307404125577,28.74554781036502,631403.5804978652						</coordinates>
					</LineString>
				</Placemark>
				<Placemark>
					<TimeSpan>
						<begin>2014-07-14</begin>
						<end></end>
					</TimeSpan>
					<styleUrl>branch_style7</styleUrl>
					<LineString>
						<tessellate>1</tessellate>
						<altitudeMode>relativeToGround</altitudeMode>
						<coordinates>						-99.41307404125577,28.74554781036502,631403.5804978652						 						-99.4858361002438,28.607948114963975,625299.2163316394						</coordinates>
					</LineString>
				</Placemark>
				<Placemark>
					<TimeSpan>
						<begin>2014-07-17</begin>
						<end></end>
					</TimeSpan>
					<styleUrl>branch_style7</styleUrl>
					<LineString>
						<tessellate>1</tessellate>
						<altitudeMode>relativeToGround</altitudeMode>
						<coordinates>						-99.4858361002438,28.607948114963975,625299.2163316394						 						-99.5587153933585,28.47034905149306,618664.0378900899						</coordinates>
					</LineString>
				</Placemark>
				<Placemark>
					<TimeSpan>
						<begin>2014-07-20</begin>
						<end></end>
					</TimeSpan>
					<styleUrl>branch_style7</styleUrl>
					<LineString>
						<tessellate>1</tessellate>
						<altitudeMode>relativeToGround</altitudeMode>
						<coordinates>						-99.5587153933585,28.47034905149306,618664.0378900899						 						-99.63171104214676,28.332750633965198,611498.0451732161						</coordinates>
					</LineString>
				</Placemark>
				<Placemark>
					<TimeSpan>
						<begin>2014-07-24</begin>
						<end></end>
					</TimeSpan>
					<styleUrl>branch_style7</styleUrl>
					<LineString>
						<tessellate>1</tessellate>
						<altitudeMode>relativeToGround</altitudeMode>
						<coordinates>						-99.63171104214676,28.332750633965198,611498.0451732161						 						-99.70482216759588,28.19515287713061,603801.2381810185						</coordinates>
					</LineString>
				</Placemark>
				<Placemark>
					<TimeSpan>
						<begin>2014-07-27</begin>
						<end></end>
					</TimeSpan>
					<styleUrl>branch_style7</styleUrl>
					<LineString>
						<tessellate>1</tessellate>
						<altitudeMode>relativeToGround</altitudeMode>
						<coordinates>						-99.70482216759588,28.19515287713061,603801.2381810185						 						-99.77804789030529,28.057555796540168,595573.616913497						</coordinates>
					</LineString>
				</Placemark>
				<Placemark>
					<TimeSpan>
						<begin>2014-07-30</begin>
						<end></end>
					</TimeSpan>
					<styleUrl>branch_style7</styleUrl>
					<LineString>
						<tessellate>1</tessellate>
						<altitudeMode>relativeToGround</altitudeMode>
						<coordinates>						-99.77804789030529,28.057555796540168,595573.616913497						 						-99.85138733067446,27.91995940861612,586815.1813706513						</coordinates>
					</LineString>
				</Placemark>
				<Placemark>
					<TimeSpan>
						<begin>2014-08-03</begin>
						<end></end>
					</TimeSpan>
					<styleUrl>branch_style7</styleUrl>
					<LineString>
						<tessellate>1</tessellate>
						<altitudeMode>relativeToGround</altitudeMode>
						<coordinates>						-99.85138733067446,27.91995940861612,586815.1813706513						 						-99.92483960910907,27.78236373073146,577525.9315524818						</coordinates>
					</LineString>
				</Placemark>
				<Placemark>
					<TimeSpan>
						<begin>2014-08-06</begin>
						<end></end>
					</TimeSpan>
					<styleUrl>branch_style7</styleUrl>
					<LineString>
						<tessellate>1</tessellate>
						<altitudeMode>relativeToGround</altitudeMode>
						<coordinates>						-99.92483960910907,27.78236373073146,577525.9315524818						 						-99.99840384624866,27.6447687812992,567705.8674589882						</coordinates>
					</LineString>
				</Placemark>
				<Placemark>
					<TimeSpan>
						<begin>2014-08-09</begin>
						<end></end>
					</TimeSpan>
					<styleUrl>branch_style7</styleUrl>
					<LineString>
						<tessellate>1</tessellate>
						<altitudeMode>relativeToGround</altitudeMode>
						<coordinates>						-99.99840384624866,27.6447687812992,567705.8674589882						 						-100.07207916321872,27.507174579873144,557354.9890901707						</coordinates>
					</LineString>
				</Placemark>
				<Placemark>
					<TimeSpan>
						<begin>2014-08-12</begin>
						<end></end>
					</TimeSpan>
					<styleUrl>branch_style7</styleUrl>
					<LineString>
						<tessellate>1</tessellate>
						<altitudeMode>relativeToGround</altitudeMode>
[truncated: 270,947 more chars]
